# Supplementary material for: Cooperative NHC/Photoredox Catalyzed Ring‐Opening of Aryl Cyclopropanes to 1‐Aroyloxylated‐3‐Acylated Alkanes
Source: PubMed Central journal article supplement — Angew Chem Int Ed Engl. 2021 Oct 25;60(48):25252–7. doi: 10.1002/anie.202110304 (PMC9298441; doi:10.1002/anie.202110304), 2021-10-25

Supporting Information

**Cooperative NHC/Photoredox Catalyzed Ring-Opening of Aryl  
Cyclopropanes to 1-Aroyloxy-3-Acylated Alkanes**

*Zhijun Zuo, Constantin G. Daniliuc, and Armido Studer\**

anie\_202110304\_sm\_miscellaneous\_information.pdf

## Supporting Information

### Table of Contents:

|                                                                       |            |
|-----------------------------------------------------------------------|------------|
| <b>A. General information:</b> .....                                  | <b>S2</b>  |
| <b>B. Preparation of substrates:</b> .....                            | <b>S3</b>  |
| <b>C. Results:</b> .....                                              | <b>S9</b>  |
| <b>D. Large-scale preparation of 3a and its derivatization:</b> ..... | <b>S28</b> |
| <b>E. Mechanistic studies:</b> .....                                  | <b>S31</b> |
| <b>F. X-ray data for 3s:</b> .....                                    | <b>S35</b> |
| <b>G. References:</b> .....                                           | <b>S43</b> |
| <b>H. NMR spectrum:</b> .....                                         | <b>S44</b> |

## A. General information:

All reactions involving air- or moisture-sensitive reagents or intermediates were carried out in pre-heated glassware using standard Schlenk techniques. All commercially available reagents were purchased from Sigma-Aldrich, Alfa Aesar, TCI Chemicals, Acros Organics or ABCR in the highest purity grade and used without further purification. DCE (99.8%, extra dry, AcroSeal) was used as received from Acros Organics.

Thin layer chromatography (TLC) was performed on Merck silica gel 60 F-254 plates and visualized by fluorescence quenching under UV light.

Column chromatography was performed on Merck or Fluka silica gel 60 (40-63  $\mu\text{m}$ ).

Melting points were measured on a Büchi M560 and are uncorrected.

$^1\text{H}$  NMR and  $^{13}\text{C}$  NMR spectra were recorded on a Bruker DPX 300, a Bruker AV 400 at 300 K, a Varian INOVA 500 or a Varian 600 UNITY plus spectrometer at 299 K. Spectra were calibrated relative to solvent's residual proton and carbon chemical shift:  $\text{CHCl}_3$  ( $\delta = 7.27$  ppm for  $^1\text{H}$  NMR and  $\delta = 77.0$  ppm for  $^{13}\text{C}$  NMR). Data are reported as follows: chemical shift, multiplicity (s = singlet, d = doublet, t = triplet, q = quartet, brs = broad singlet, m = multiplet), coupling constants (Hz) and integration.

Infrared spectra (IR) were measured on a Digilab 3100 FT-IR Excalibur Series spectrometer and the position of the absorption bands is given in wave numbers  $\nu$  ( $\text{cm}^{-1}$ ).

HRMS ESI (m/z) spectra were recorded on a Bruker MicroTof or an Orbitrap LTQ XL (Nanospray) of Thermo Scientific.

Chiral HPLC analysis was performed on a Hewlett Packard HP 1100 Series HPLC System using AD-H (0.46\*25 cm, 5  $\mu\text{m}$  silica-gel, Daicel<sup>TM</sup>) and IC (0.46\*25 cm, 5  $\mu\text{m}$  silica-gel, Daicel<sup>TM</sup>) chiral columns eluting with a mixture of cyclohexane and isopropyl alcohol.

## B. Preparation of substrates:

### Substrates Preparation:

#### acyl fluorides:

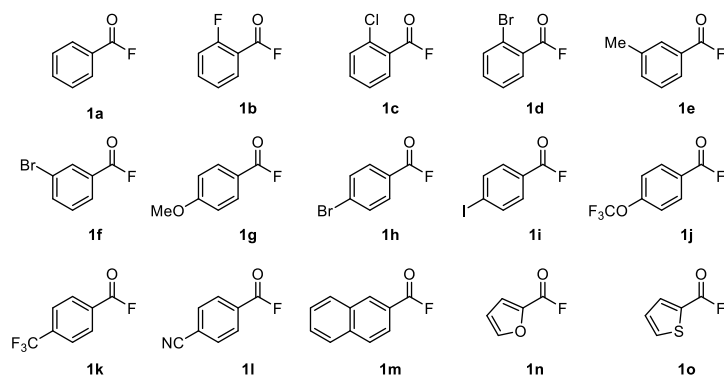

#### aryl cyclopropanes:

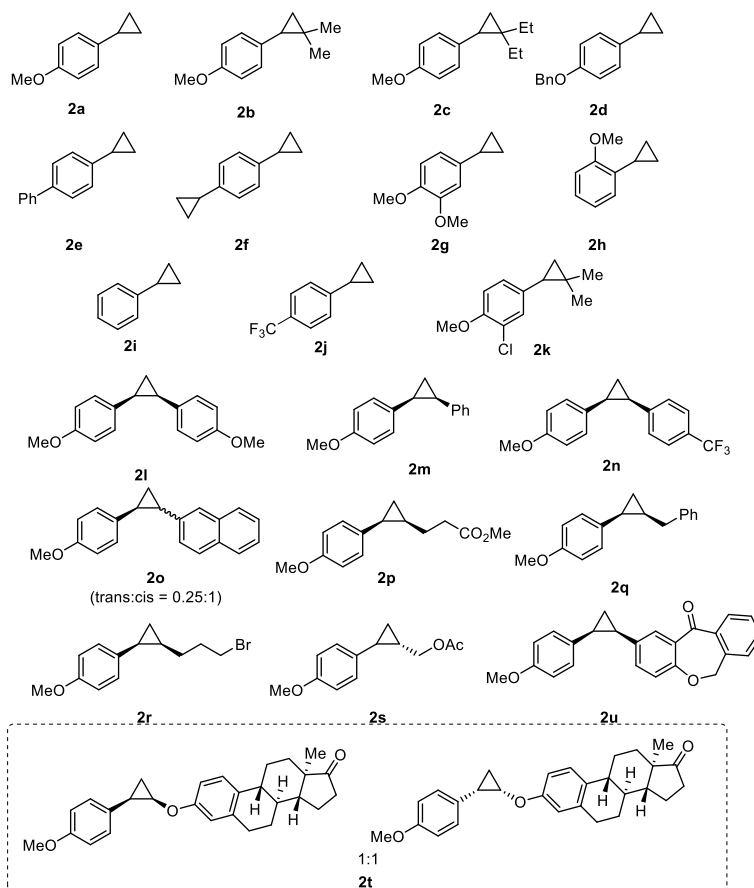

### General procedure for preparation of acyl fluorides:

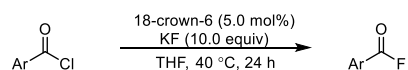

To a 100-mL Schlenk tube with a magnetic stir bar, were successively added an acyl chloride (1.0 equiv.), 18-crown-6 (5.0 mol %), KF (10.0 equiv.) and THF (0.2 M). After the reaction was stirred at 40 °C for 24 hours, the insoluble inorganic solid was filtered, and the volatiles were removed using a

rotary evaporator. The crude product was purified by bulb-to-bulb distillation to afford the corresponding acyl fluorides.

All acyl fluorides are known compounds and spectroscopic data are in accordance with those described in literature.<sup>[1]</sup>

### Preparation of cyclopropanes:

#### General procedure A:<sup>[2]</sup>

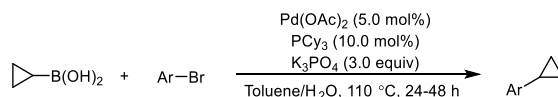

In a 50 mL Schlenk tube with magnetic stirring bar were added the corresponding aryl bromide (3.0 mmol, 1 equiv.), tricyclohexylphosphine (84.0 mg, 0.30 mmol, 0.1 equiv.), palladium acetate (33.7 mg, 0.15 mol, 0.05 equiv.), tripotassium phosphate (1.9 g, 9.0 mmol, 3.0 equiv.) and cyclopropylboronic acid (387.0 mg, 4.5 mmol, 1.5 equiv.). Then, toluene (10 mL) and 0.5 mL of water were added, and the tube was closed. The reaction mixture was shaken briefly and set under inert atmosphere by bubbling nitrogen gas through the vial for 5 minutes. Afterwards, the tube was placed into an oil bath and stirred at 110 °C for 24-48 h. Upon completion, the reaction mixture was poured into a separatory funnel, diluted with ethyl acetate and washed with 15 mL water twice. The organic layer was dried with Na<sub>2</sub>SO<sub>4</sub>, concentrated *in vacuo* and purified by column chromatography to give the title compound. Compounds **2a**, **2d-j** were prepared following the General Procedure A.

#### General procedure B:<sup>[3]</sup>

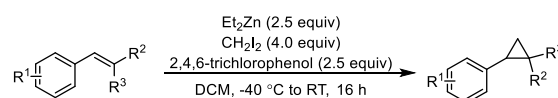

In a 100 mL oven-dried round-bottom flask with a stir bar, was added 2,4,6-trichlorophenol (1.18 g, 6.0 mmol, 2.5 equiv.) under nitrogen atmosphere. DCM (60 mL, 0.1 M) was added into the flask and the reaction mixture was cooled to -40 °C. ZnEt<sub>2</sub> (1.0 M, 6.0 mL, 6.0 mmol, 2.5 equiv.) was added slowly into the flask by syringe and the reaction mixture was stirred at this temperature for 15 min. CH<sub>2</sub>I<sub>2</sub> (2.57 g, 9.6 mmol, 4.0 equiv.) was added slowly by syringe and the reaction mixture was stirred at this temperature for another 15 min. Next, the corresponding solution of alkene (2.4 mmol, 1.0 equiv.) in DCM (10 mL) was added by syringe and the reaction mixture was allowed to warm to room temperature and stirred for 16 h. After the reaction reached completion, the reaction mixture was

quenched with sat.  $\text{NH}_4\text{Cl}$  (30 mL) and extracted with DCM (100 mL) for 3 times. The combined organic layers were washed with aq.  $\text{NaOH}$  (1.0 M, 30 mL) and brine (20 mL), dried over  $\text{Na}_2\text{SO}_4$  and filtered. After the volatile materials were removed under reduced pressure, the crude residue was purified by column chromatography to give the title compound. Compounds **2b**, **2c**, **2k**, **2s** were prepared following the General Procedure B.

#### General procedure C:

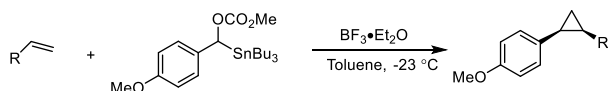

To a 50 mL oven-dried round-bottom flask equipped with a stir bar was added a solution of (4-methoxyphenyl)(tributylstannyl)methyl methyl carbonate (972 mg, 2.0 mmol, 1.0 equiv.) and the corresponding alkene (2.2 mmol, 1.1 equiv.) in toluene (10 mL) under nitrogen atmosphere at room temperature. The reaction vessel was cooled to  $-23\text{ }^\circ\text{C}$ .  $\text{BF}_3\cdot\text{OEt}_2$  (312 mg, 2.2 mmol, 1.1 equiv.) was added by syringe and the mixture was stirred at this temperature for 2 h. After the reaction reached completion according to the TLC analysis, the reaction mixture was quenched with sat.  $\text{NaHCO}_3$  (10 mL) and extracted with EtOAc (30 mL) for 3 times. The combined organic layers were washed with brine (20 mL), dried over  $\text{Na}_2\text{SO}_4$  and filtered. After the volatile materials were removed under reduced pressure, the crude residue was purified by column chromatography to afford the desired compound. Compounds **2l-r**, **2t-u** were prepared following the General Procedure C.

The spectroscopic data of all known cyclopropanes are in accordance with those described in literature.<sup>[3-4]</sup>

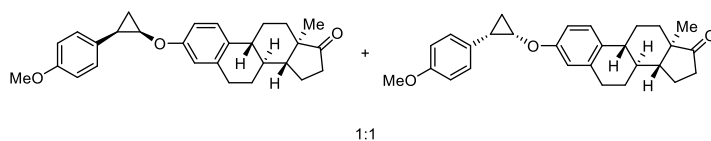

**(8S,9R,13R,14R)-3-(2-(4-Methoxyphenyl)cyclopropoxy)-13-methyl-6,7,8,9,11,12,13,14,15,16-decahydro-17H-cyclopenta[a]phenanthren-17-one** +

**(8S,9R,13R,14R)-3-((1S,2S)-2-(4-methoxyphenyl)cyclopropoxy)-13-methyl-6,7,8,9,11,12,13,14,15,16-decahydro-17H-cyclopenta[a]phenanthren-17-one (2t)**

Following procedure C to afford a white solid (668.1 mg, 73% yield).

MP: 54-55  $^\circ\text{C}$ .

$^1\text{H}$  NMR (300 MHz,  $\text{CDCl}_3$ ):  $\delta$  7.20 – 7.14 (m, 3H), 6.86 – 6.75 (m, 3H), 6.71 (dd,  $J = 4.9, 2.8$  Hz, 1H),

3.92 (td,  $J = 6.5, 3.7$  Hz, 1H), 3.79 (s, 3H), 2.96 – 2.77 (m, 2H), 2.59 – 2.34 (m, 2H), 2.30 – 1.93 (m, 7H), 1.55 – 1.34 (m, 6H), 1.14 (dd,  $J = 6.9, 3.1$  Hz, 1H), 0.92 (s, 3H).

$^{13}\text{C}$  NMR (76 MHz,  $\text{CDCl}_3$ ):  $\delta$  221.1, 157.9, 156.7, 137.5, 132.4, 129.2, 128.9, 126.1, 115.4, 113.4, 112.7, 55.6, 55.2, 50.4, 48.0, 44.0, 38.3, 35.9, 31.6, 29.7, 26.6, 25.9, 22.2, 21.6, 13.9, 12.8.

FTIR (neat):  $\nu$  ( $\text{cm}^{-1}$ ) 3053, 2935, 1736, 1515, 1265, 1246, 732.

HRMS (ESI-TOF)  $m/z$ :  $[\text{M}+\text{Na}^+]$  Calcd for  $\text{C}_{28}\text{H}_{32}\text{NaO}_3$  439.2249; found: 439.2238.

### Synthesis of enantioenriched cyclopropane (S,S)-2s<sup>[5]</sup>

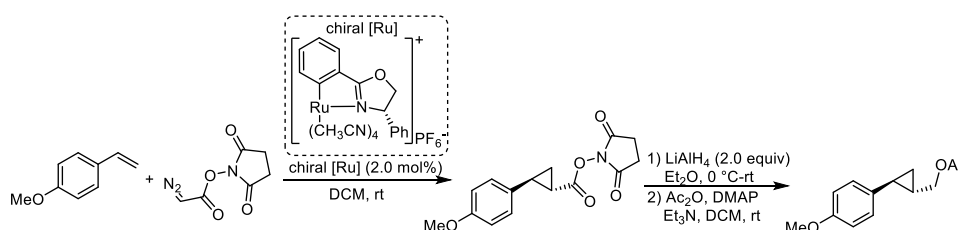

a) To an oven-dried 100 mL round-bottom flask equipped with a stir bar, succinimidyl diazocetate (183.0 mg, 1.0 mmol), 1-methoxy-4-vinylbenzene (114.6  $\mu\text{L}$ , 5.0 mmol), chiral Ru(II)-Pheox catalyst (12.6 mg, 0.02 mmol) and  $\text{CH}_2\text{Cl}_2$  (10.0 mL) were added at room temperature. After that we checked the TLC in less than 1 min, and we noticed the disappearance of the diazo compound. The residue was purified by column chromatography on silica gel (eluting with pentane/ethyl acetate = 3/1) to afford the white solid (263.0 mg, 91% yield).

b) To the solution of succinimidyl cyclopropyl carboxylate derivatives (231.1 mg, 0.8 mmol) in  $\text{Et}_2\text{O}$  (10.0 mL) was added lithium aluminium hydride (60.8 mg, 1.6 mmol) at 0 °C. After stirring for 2 h at same temperature, the reaction solution was quenched with water (0.5 mL), filtered, and evaporated under reduced pressure. The crude alcohol was used without further purification.

c) A solution of crude alcohol in  $\text{CH}_2\text{Cl}_2$  (10.0 mL) was treated with  $\text{Ac}_2\text{O}$  (244.8 mg, 3.0 equiv.),  $\text{Et}_3\text{N}$  (242.4 mg, 3.0 equiv.), and 4-DMAP (10.0 mg, 0.1 equiv.) at 0 °C. The mixture was allowed to warm up to room temperature overnight. The volatile materials of the reaction mixture were removed under reduced pressure, the crude residue was purified by column chromatography (pentane/ethyl acetate = 10:1) to afford ((1*S*,2*S*)-2-(4-methoxyphenyl)cyclopropyl)methyl acetate as colorless oil (136.0 mg, 77% yield over 2 steps, 90% ee). HPLC Analysis: Chiralpak AD-H (Cyclohexane/*i*PrOH = 99/1, 1.0 mL/min, 25 °C).

Racemic sample:

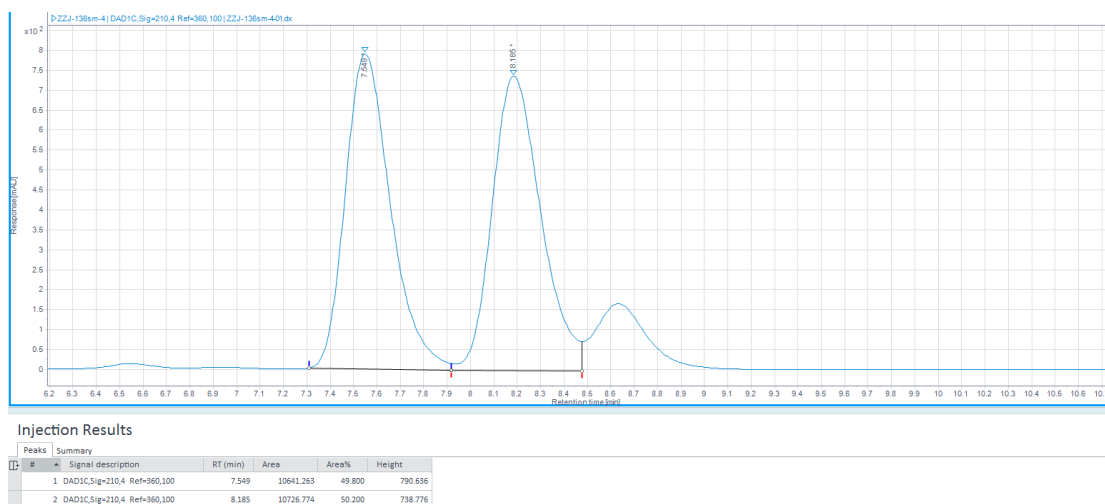

Chiral sample:

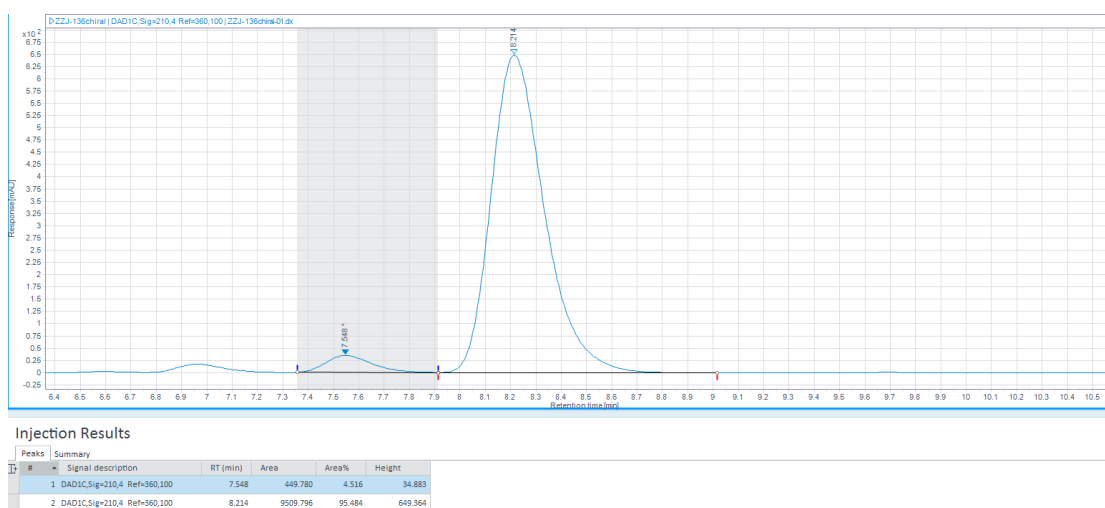

### Synthesis of enantioenriched cyclopropane (R,R)-21<sup>4</sup>

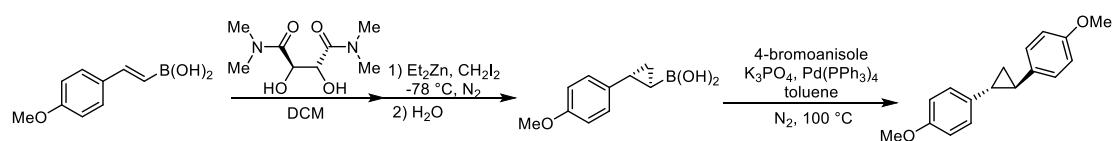

a) To an oven-dried 100mL round-bottom flask equipped with a stir bar, (*E*)-(4-methoxystyryl)boronic acid (0.86 g, 5 mmol, 1.0 equiv.), (+)-*N,N,N',N'*-Tetramethyl-*L*-tartaric acid diamide (1.05 g, 5 mmol, 1.0 equiv.) and dry DCM (20 mL) were added at room temperature. The reaction mixture was stirred for 2 h and then cooled to -78 °C. In a separate oven-dried 100 mL flask, Et<sub>2</sub>Zn (1.0 M, 15 mL, 15 mmol, 3.0 equiv.) was dissolved in dry DCM (20 mL), cooled to -78 °C and treated dropwise with CH<sub>2</sub>I<sub>2</sub> (1.0 mL, 12 mmol, 4.8 equiv.), then stirred vigorously for 10 min to generate the carbenoid



(ineffective stirring due to precipitation of zinc salt or  $\text{CH}_2\text{I}_2$  did not affect the reaction). The pre-chilled  $-78\text{ }^\circ\text{C}$  solution was then quickly added *via* syringe over 2 min. The mixture was stirred at  $-78\text{ }^\circ\text{C}$  for 8 h. 20 mL of saturated aqueous  $\text{NH}_4\text{Cl}$  solution was carefully added to quench the reaction. After addition of  $\text{NH}_4\text{Cl}$ , the mixture was stirred at  $-78\text{ }^\circ\text{C}$  for 5 min, taken out of the cooling bath and warmed to ambient temperature. After phase separation, 1M  $\text{HCl}$  was added just to dissolve precipitate in the aqueous phase (pH was 5-6 at this point). The aqueous phase was extracted with 50 mL of DCM three times. The combined organic phases were dried with  $\text{MgSO}_4$ , filtered and concentrated and pumped to afford crude ((*1R,2R*)-2-(4-methoxyphenyl)cyclopropyl)boronic acid (directly used for the next step).

b) To an oven-dried 50 mL round-bottom flask equipped with a stir bar, crude ((*1R,2R*)-2-(4-methoxyphenyl)cyclopropyl)boronic acid, 4-bromoanisole (864 mg, 4.5 mmol, 0.9 equiv.),  $\text{K}_3\text{PO}_4$  (3.2 g, 15 mmol, 3.3 equiv.),  $\text{Pd}(\text{PPh}_3)_4$  (156 mg, 0.03 equiv.) and toluene (20 mL) were added under nitrogen atmosphere. The reaction mixture was stirred at  $100\text{ }^\circ\text{C}$  for 16 h. Once the reaction was judged to be complete by TLC analysis, the reaction mixture was filtered to remove the solids and the volatile materials of the reaction mixture were removed under reduced pressure, the crude residue was purified by column chromatography (pentane:EA = 40:1) to (*1R,2R*)-1,2-bis(4-methoxyphenyl)cyclopropane as a white solid (381 mg, 30% yield over two steps, ee 78%). HPLC Analysis: Chiralpak AD-H (Cyclohexane/*i*PrOH = 98/2, 1.0 mL/min,  $25\text{ }^\circ\text{C}$ ).

Racemic sample:

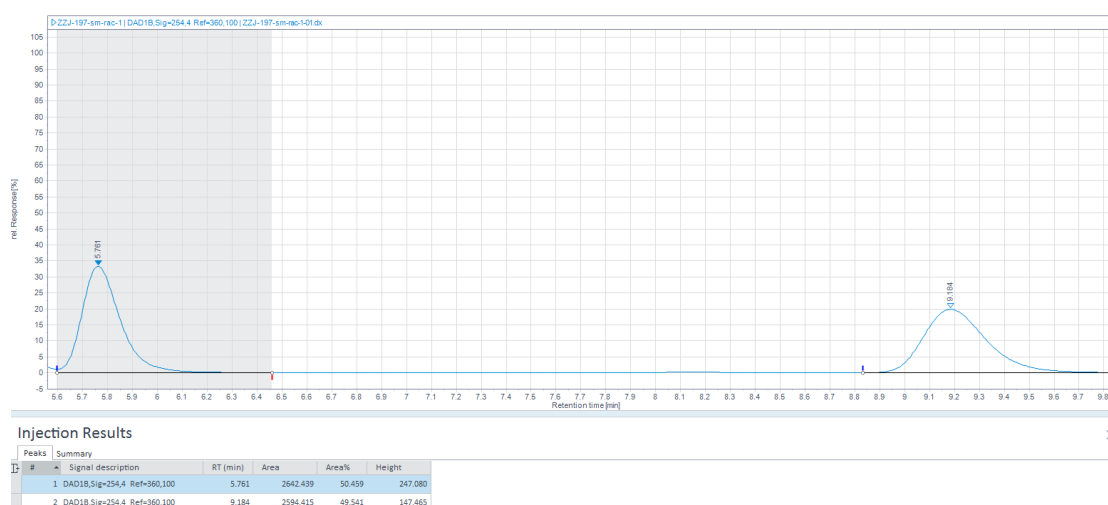

Chiral sample:

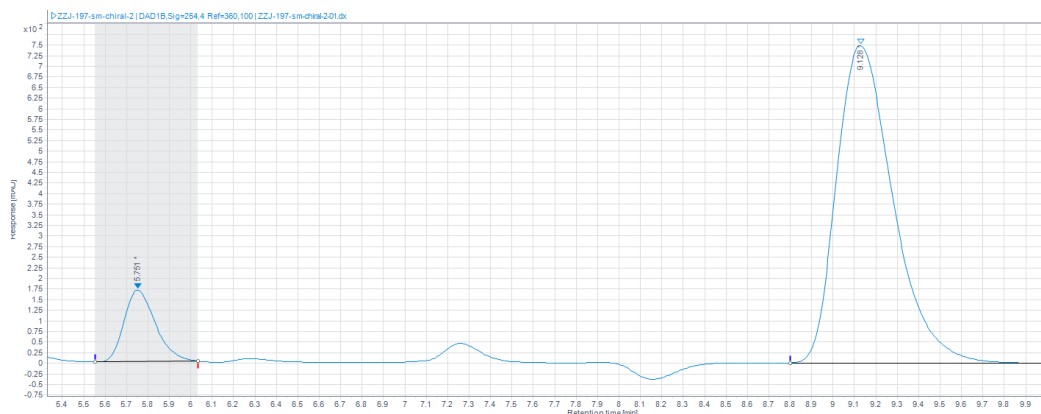

#### Injection Results

| # | Signal description          | RT (min) | Area      | Area%  | Height  |
|---|-----------------------------|----------|-----------|--------|---------|
| 1 | DAD18,Sig=254,4 Ref=360,100 | 5.751    | 1721.429  | 11.164 | 169.167 |
| 2 | DAD18,Sig=254,4 Ref=360,100 | 9.128    | 13698.444 | 88.836 | 748.666 |

### C. Results:

#### General procedure D for the reactions with acyl fluorides:

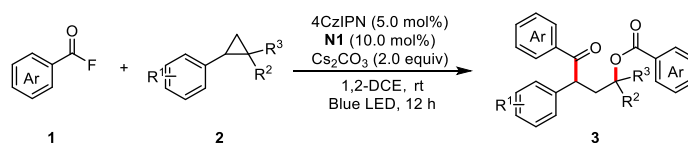

To an oven-dried 10 mL Schlenk tube equipped with a stir bar, an acyl fluoride **1** (0.50 mmol, 2.5 equiv.), an aryl cyclopropane **2** (0.20 mmol, 1.0 equiv.), photocatalyst 4CzIPN (7.9 mg, 5.0 mol%), **N1** (6.3 mg, 10.0 mol%) and Cs<sub>2</sub>CO<sub>3</sub> (130.4 mg, 2.0 equiv.) were added. Then, the reaction tube was evacuated and backfilled with argon for three times. Subsequently, anhydrous DCE (2.0 mL, 0.1 M) was added. The resulting mixture was irradiated with blue LED at room temperature for 12 h. After solvent evaporation, the residue was purified by silica gel chromatography to afford the desired product **3**.

#### General procedure E for reactions with aryl anhydrides:

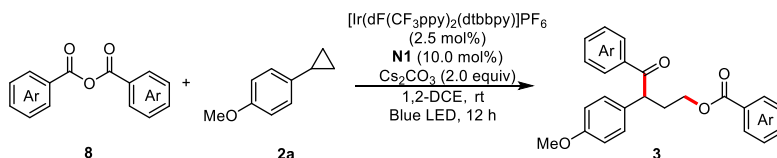

To an oven-dried 10 mL Schlenk tube equipped with a stir bar, an aryl anhydride **8** (0.20 mmol, 1.0 equiv.), the aryl cyclopropane **2a** (29.6 mg, 0.20 mmol, 1.0 equiv.), photocatalyst [Ir(dF(CF<sub>3</sub>)ppy)<sub>2</sub>(dtbbpy)]PF<sub>6</sub> (5.6 mg, 2.5 mol%), **N1** (6.3 mg, 10.0 mol%) and Cs<sub>2</sub>CO<sub>3</sub> (130.4 mg, 2.0 equiv.) were added. Then, the reaction tube was evacuated and backfilled with argon for three times. Subsequently, anhydrous DCE (2.0 mL, 0.1 M) was added. The resulting mixture was irradiated under

blue LEDs at room temperature for 12 h. After solvent evaporation, the residue was purified by silica gel chromatography to afford the desired product **3**.

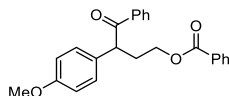

### **3-(4-Methoxyphenyl)-4-oxo-4-phenylbutyl benzoate (3a)**

Performed with general procedure D and purified by flash silica column chromatography (pentane/ethyl acetate = 20:1)

Colorless oil (60.6 mg, 81% yield)

$^1\text{H}$  NMR (500 MHz,  $\text{CDCl}_3$ ):  $\delta$  7.98 (ddt,  $J = 16.3, 7.1, 1.4$  Hz, 4H), 7.59 – 7.53 (m, 1H), 7.50 – 7.43 (m, 3H), 7.41 – 7.35 (m, 2H), 7.29 – 7.21 (m, 2H), 6.85 – 6.79 (m, 2H), 4.76 (t,  $J = 7.3$  Hz, 1H), 4.36 (dt,  $J = 11.6, 5.9$  Hz, 1H), 4.29 (ddd,  $J = 11.2, 7.8, 5.5$  Hz, 1H), 3.75 (s, 3H), 2.70 – 2.60 (m, 1H), 2.30 (ddt,  $J = 13.9, 7.8, 5.8$  Hz, 1H).

$^{13}\text{C}$  NMR (126 MHz,  $\text{CDCl}_3$ ):  $\delta$  199.1, 166.4, 158.9, 136.5, 132.9, 130.5, 130.2, 129.6, 129.3, 128.8, 128.5, 128.4, 114.6, 63.0, 55.2, 49.5, 32.7.

FTIR (neat):  $\nu$  ( $\text{cm}^{-1}$ ) 3066, 2837, 1714, 1680, 1511, 1449, 1266, 1248, 1110, 711.

HRMS (ESI-TOF)  $m/z$ :  $[\text{M}+\text{Na}^+]$  Calcd for  $\text{C}_{24}\text{H}_{22}\text{NaO}_4$  397.1415; found: 397.1405.

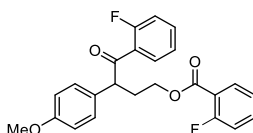

### **4-(2-Fluorophenyl)-3-(4-methoxyphenyl)-4-oxobutyl 2-fluorobenzoate (3b)**

Performed with general procedure D and purified by flash silica column chromatography (pentane/ethyl acetate = 20:1)

Colorless oil (41.8 mg, 51% yield)

$^1\text{H}$  NMR (500 MHz,  $\text{CDCl}_3$ ):  $\delta$  7.91 (td,  $J = 7.5, 1.9$  Hz, 1H), 7.74 (td,  $J = 7.5, 1.9$  Hz, 1H), 7.56 – 7.50 (m, 1H), 7.42 (ddd,  $J = 8.0, 5.9, 5.0, 1.3$  Hz, 1H), 7.22 – 7.12 (m, 5H), 7.03 (ddd,  $J = 11.3, 8.3, 1.1$  Hz, 1H), 6.81 (dd,  $J = 8.1, 1.3$  Hz, 2H), 4.77 (dd,  $J = 8.3, 6.4$  Hz, 1H), 4.41 (dt,  $J = 11.3, 5.7$  Hz, 1H), 4.21 (ddd,  $J = 11.3, 8.1, 5.2$  Hz, 1H), 3.75 (d,  $J = 0.8$  Hz, 3H), 2.71 – 2.61 (m, 1H), 2.28 – 2.19 (m, 1H).

$^{13}\text{C}$  NMR (126 MHz,  $\text{CDCl}_3$ )  $\{^{19}\text{F}\}$ :  $\delta$  198.3, 164.4, 161.9, 160.9, 158.9, 134.4, 134.2, 132.2, 131.1, 129.7, 129.4, 125.9, 124.4, 123.9, 118.8, 116.9, 116.6, 114.3, 63.1, 55.2, 53.2, 32.1.

$^{19}\text{F}$  NMR (282 MHz,  $\text{CDCl}_3$ ):  $\delta$  -109.18 (d,  $J = 4.1$  Hz), -109.65 (d,  $J = 4.5$  Hz).

FTIR (neat):  $\nu$  ( $\text{cm}^{-1}$ ) 2904, 1717, 1685, 1610, 1511, 1452, 1249, 755.

HRMS (ESI-TOF)  $m/z$ :  $[\text{M}+\text{Na}^+]$  Calcd for  $\text{C}_{24}\text{H}_{20}\text{F}_2\text{NaO}_4$  433.1227, found: 433.1216.

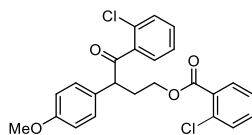

#### 4-(2-Chlorophenyl)-3-(4-methoxyphenyl)-4-oxobutyl 2-chlorobenzoate (3c)

Performed with general procedure D and purified by flash silica column chromatography (pentane/ethyl acetate = 20:1)

Colorless oil (67.2 mg, 76% yield)

$^1\text{H}$  NMR (300 MHz,  $\text{CDCl}_3$ ):  $\delta$  7.73 – 7.67 (m, 1H), 7.39 – 7.33 (m, 2H), 7.28 – 7.14 (m, 4H), 7.06 – 7.00 (m, 3H), 6.75 – 6.69 (m, 2H), 4.56 (dd,  $J = 8.4, 6.3$  Hz, 1H), 4.34 (dt,  $J = 11.6, 5.9$  Hz, 1H), 4.19 (ddd,  $J = 11.1, 7.7, 5.3$  Hz, 1H), 3.68 (s, 3H), 2.73 – 2.47 (m, 1H), 2.23 (ddt,  $J = 14.3, 8.4, 5.8$  Hz, 1H).

$^{13}\text{C}$  NMR (76 MHz,  $\text{CDCl}_3$ ):  $\delta$  202.6, 165.7, 159.1, 139.4, 133.6, 132.6, 131.5, 131.2, 131.1, 130.4, 130.2, 129.8, 128.9, 128.5, 126.6, 126.5, 114.5, 63.4, 55.2, 53.7, 31.2.

FTIR (neat):  $\nu$  ( $\text{cm}^{-1}$ ) 2962, 2837, 1728, 1700, 1510, 1434, 1246, 746.

HRMS (ESI-TOF)  $m/z$ :  $[\text{M}+\text{Na}^+]$  Calcd for  $\text{C}_{24}\text{H}_{20}\text{Cl}_2\text{NaO}_4$  465.0636, found: 465.0629.

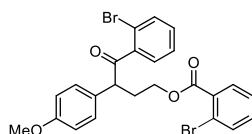

#### 4-(2-Bromophenyl)-3-(4-methoxyphenyl)-4-oxobutyl 2-bromobenzoate (3d)

Performed with general procedure D and purified by flash silica column chromatography (pentane/ethyl acetate = 20:1)

Colorless oil (75.5 mg, 71% yield)

$^1\text{H}$  NMR (300 MHz,  $\text{CDCl}_3$ ):  $\delta$  7.81 – 7.73 (m, 1H), 7.73 – 7.64 (m, 1H), 7.56 – 7.48 (m, 1H), 7.41 – 7.33 (m, 2H), 7.23 – 7.10 (m, 4H), 7.02 – 6.96 (m, 1H), 6.85 – 6.78 (m, 2H), 4.62 (dd,  $J = 8.5, 6.3$  Hz, 1H), 4.45 (dt,  $J = 11.5, 5.9$  Hz, 1H), 4.28 (ddd,  $J = 11.2, 7.8, 5.4$  Hz, 1H), 3.78 (s, 3H), 2.73 (ddt,  $J = 13.9, 7.6, 5.9$  Hz, 1H), 2.35 (ddt,  $J = 14.4, 8.6, 5.8$  Hz, 1H).

$^{13}\text{C}$  NMR (76 MHz,  $\text{CDCl}_3$ ):  $\delta$  203.2, 166.1, 159.2, 141.5, 134.4, 133.3, 132.6, 132.3, 131.4, 131.1, 129.9, 128.8, 128.3, 127.2, 127.0, 121.6, 118.6, 114.5, 63.5, 55.2, 53.7, 31.0.

FTIR (neat):  $\nu$  ( $\text{cm}^{-1}$ ) 3059, 2839, 1728, 1701, 1511, 1465, 1248, 732.

HRMS (ESI-TOF)  $m/z$ :  $[M+Na^+]$  Calcd for  $C_{24}H_{20}Br_2NaO_4$  552.9626, found: 552.9622.

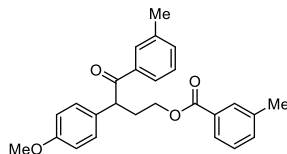

### 3-(4-Methoxyphenyl)-4-oxo-4-(*m*-tolyl)butyl 3-methylbenzoate (3e)

Performed with general procedure D and purified by flash silica column chromatography (pentane/ethyl acetate = 20:1)

Colorless oil (54.7 mg, 81% yield)

$^1\text{H}$  NMR (500 MHz,  $\text{CDCl}_3$ ):  $\delta$  7.82 – 7.73 (m, 4H), 7.40 – 7.27 (m, 4H), 7.26 – 7.22 (m, 2H), 6.86 – 6.80 (m, 2H), 4.74 (t,  $J = 7.3$  Hz, 1H), 4.38 – 4.23 (m, 2H), 3.75 (s, 3H), 2.75 – 2.56 (m, 1H), 2.40 (s, 3H), 2.35 (s, 3H), 2.31 – 2.24 (m, 1H).

$^{13}\text{C}$  NMR (126 MHz,  $\text{CDCl}_3$ ):  $\delta$  199.4, 166.6, 158.8, 138.3, 138.1, 136.6, 133.7, 133.7, 130.7, 130.2, 130.1, 129.3, 129.3, 128.4, 128.2, 126.7, 125.9, 114.5, 63.0, 55.2, 49.5, 32.7, 21.3, 21.2.

FTIR (neat):  $\nu$  ( $\text{cm}^{-1}$ ) 2958, 1715, 1678, 1510, 1462, 1276, 1197, 744.

HRMS (ESI-TOF)  $m/z$ :  $[M+Na^+]$  Calcd for  $C_{26}H_{26}NaO_4$  425.1728, found: 425.1717.

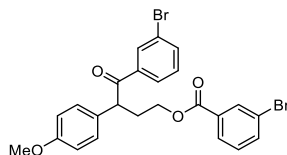

### 4-(3-Bromophenyl)-3-(4-methoxyphenyl)-4-oxobutyl 3-bromobenzoate (3f)

Performed with general procedure D and purified by flash silica column chromatography (pentane/ethyl acetate = 20:1)

Colorless oil (72.4 mg, 68% yield)

$^1\text{H}$  NMR (300 MHz,  $\text{CDCl}_3$ ):  $\delta$  8.09 (dt,  $J = 3.4, 1.8$  Hz, 2H), 7.88 (ddt,  $J = 14.3, 7.8, 1.4$  Hz, 2H), 7.71 – 7.57 (m, 2H), 7.39 – 7.20 (m, 4H), 6.89 – 6.77 (m, 2H), 4.65 (t,  $J = 7.2$  Hz, 1H), 4.34 (tdd,  $J = 11.2, 9.6, 5.7$  Hz, 2H), 3.76 (s, 3H), 2.72 – 2.61 (m, 1H), 2.37 – 2.20 (m, 1H).

$^{13}\text{C}$  NMR (76 MHz,  $\text{CDCl}_3$ ):  $\delta$  197.6, 165.1, 159.0, 138.1, 135.9, 135.8, 132.5, 132.0, 131.8, 130.1, 129.9, 129.8, 129.3, 128.1, 127.2, 122.9, 122.5, 114.8, 63.5, 55.2, 49.9, 32.6.

FTIR (neat):  $\nu$  ( $\text{cm}^{-1}$ ) 2837, 1719, 1683, 1510, 1247, 745.

HRMS (ESI-TOF)  $m/z$ :  $[M+Na^+]$  Calcd for  $C_{24}H_{20}Br_2NaO_4$  552.9626, found: 552.9623.

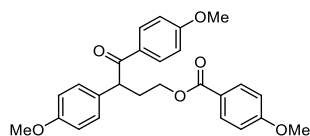

### 3,4-Bis(4-methoxyphenyl)-4-oxobutyl 4-methoxybenzoate (3g)

Performed with general procedure D and purified by flash silica column chromatography (pentane/ethyl acetate = 5:1)

Colorless oil (68.6 mg, 79% yield)

$^1\text{H NMR}$  (300 MHz,  $\text{CDCl}_3$ ):  $\delta$  7.52 – 7.38 (m, 4H), 7.29 – 7.23 (m, 1H), 7.20 – 7.12 (m, 3H), 7.02 (ddd,  $J = 8.2, 2.7, 1.0$  Hz, 1H), 6.94 (ddd,  $J = 8.2, 2.7, 0.9$  Hz, 1H), 6.79 – 6.72 (m, 2H), 4.64 (t,  $J = 7.3$  Hz, 1H), 4.33 – 4.14 (m, 2H), 3.77 (s, 3H), 3.71 (s, 3H), 3.67 (s, 3H), 2.63 – 2.50 (m, 1H), 2.23 – 2.16 (m, 1H).

$^{13}\text{C NMR}$  (76 MHz,  $\text{CDCl}_3$ ):  $\delta$  198.9, 166.3, 159.7, 159.6, 158.8, 137.9, 131.5, 130.5, 129.5, 129.4, 129.3, 121.9, 121.3, 119.4, 114.6, 114.1, 113.1, 63.2, 55.4, 55.3, 55.2, 49.6, 32.7.

FTIR (neat):  $\nu$  ( $\text{cm}^{-1}$ ) 2963, 1715, 1679, 1449, 1269, 1111, 710.

HRMS (ESI-TOF)  $m/z$ :  $[\text{M}+\text{Na}^+]$  Calcd for  $\text{C}_{26}\text{H}_{26}\text{NaO}_6$  457.1627, found: 457.1618.

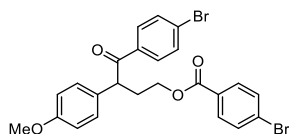

### 4-(4-Bromophenyl)-3-(4-methoxyphenyl)-4-oxobutyl 4-bromobenzoate (3h)

Performed with general procedure D and purified by flash silica column chromatography (pentane/ethyl acetate = 20:1)

Colorless oil (72.4 mg, 68% yield)

$^1\text{H NMR}$  (300 MHz,  $\text{CDCl}_3$ ):  $\delta$  7.76 – 7.63 (m, 4H), 7.49 – 7.32 (m, 4H), 7.14 – 7.03 (m, 2H), 6.77 – 6.70 (m, 2H), 4.53 (t,  $J = 7.2$  Hz, 1H), 4.28 – 4.11 (m, 2H), 3.65 (s, 3H), 2.62 – 2.44 (m, 1H), 2.29 – 2.10 (m, 1H).

$^{13}\text{C NMR}$  (76 MHz,  $\text{CDCl}_3$ )  $\delta$  197.9, 165.7, 158.9, 135.1, 131.9, 131.7, 131.1, 130.3, 130.1, 129.2, 129.0, 128.2, 128.1, 114.8, 63.3, 55.2, 49.8, 32.5.

FTIR (neat):  $\nu$  ( $\text{cm}^{-1}$ ) 2908, 1717, 1680, 1585, 1397, 1267, 1173, 755.

HRMS (ESI-TOF)  $m/z$ :  $[\text{M}+\text{Na}^+]$  Calcd for  $\text{C}_{24}\text{H}_{20}\text{Br}_2\text{NaO}_4$  552.9626, found: 552.9622.

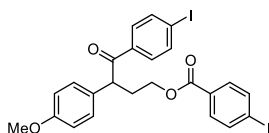

### 4-(4-Iodophenyl)-3-(4-methoxyphenyl)-4-oxobutyl 4-iodobenzoate (3i)

Performed with general procedure D and purified by flash silica column chromatography (pentane/ethyl acetate = 20:1)

Colorless oil (73.9 mg, 59% yield)

$^1\text{H}$  NMR (300 MHz,  $\text{CDCl}_3$ ):  $\delta$  7.75 – 7.49 (m, 8H), 7.12 – 7.05 (m, 2H), 6.78 – 6.69 (m, 2H), 4.52 (t,  $J$  = 7.2 Hz, 1H), 4.28 – 4.12 (m, 2H), 3.66 (s, 3H), 2.60 – 2.45 (m, 1H), 2.27 – 2.09 (m, 1H).

$^{13}\text{C}$  NMR (76 MHz,  $\text{CDCl}_3$ ):  $\delta$  198.2, 165.9, 158.9, 137.9, 137.7, 135.6, 130.9, 130.1, 130.1, 129.6, 129.2, 114.7, 101.0, 100.8, 63.3, 55.2, 49.7, 32.5.

FTIR (neat):  $\nu$  ( $\text{cm}^{-1}$ ) 2906, 1716, 1680, 1580, 1392, 1264, 1007, 817.

HRMS (ESI-TOF)  $m/z$ :  $[\text{M}+\text{Na}^+]$  Calcd for  $\text{C}_{24}\text{H}_{20}\text{I}_2\text{NaO}_4$  648.9348, found: 648.9345.

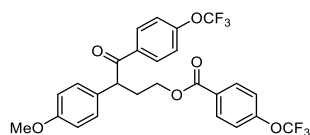

### 3-(4-Methoxyphenyl)-4-oxo-4-(4-(trifluoromethoxy)phenyl)butyl 4-(trifluoromethoxy)benzoate (3j)

Performed with general procedure D and purified by flash silica column chromatography (pentane/ethyl acetate = 20:1)

Colorless oil (74.8 mg, 69% yield)

$^1\text{H}$  NMR (300 MHz,  $\text{CDCl}_3$ ):  $\delta$  8.12 – 7.88 (m, 4H), 7.36 – 7.12 (m, 6H), 6.97 – 6.73 (m, 2H), 4.67 (t,  $J$  = 7.2 Hz, 1H), 4.43 – 4.27 (m, 2H), 3.76 (s, 3H), 2.75 – 2.60 (m, 1H), 2.35 – 2.22 (m, 1H).

$^{13}\text{C}$  NMR (76 MHz,  $\text{CDCl}_3$ )  $\{^{19}\text{F}\}$ :  $\delta$  197.3, 165.2, 159.0, 152.7, 152.4, 134.5, 131.5, 130.8, 130.1, 129.2, 128.5, 122.0, 120.2, 118.6, 114.8, 63.4, 55.2, 49.9, 32.6.

$^{19}\text{F}$  NMR (282 MHz,  $\text{CDCl}_3$ ):  $\delta$  -57.65, -57.67.

FTIR (neat):  $\nu$  ( $\text{cm}^{-1}$ ) 2839, 1720, 1684, 1608, 1511, 1247, 1109, 738.

HRMS (ESI-TOF)  $m/z$ :  $[\text{M}+\text{Na}^+]$  Calcd for  $\text{C}_{26}\text{H}_{20}\text{F}_6\text{NaO}_6$  565.1061, found: 565.1052.

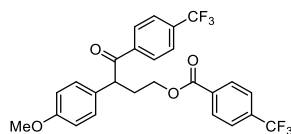

### 3-(4-Methoxyphenyl)-4-oxo-4-(4-(trifluoromethyl)phenyl)butyl 4-(trifluoromethyl)benzoate (3k)

Performed with general procedure D and purified by flash silica column chromatography

(pentane/ethyl acetate = 20:1)

Colorless oil (67.3 mg, 66% yield)

$^1\text{H NMR}$  (300 MHz,  $\text{CDCl}_3$ ):  $\delta$  8.04 – 7.88 (m, 4H), 7.57 (dd,  $J = 19.1, 8.2$  Hz, 4H), 7.16 – 7.05 (m, 2H), 6.79 – 6.69 (m, 2H), 4.60 (q,  $J = 7.6$  Hz, 1H), 4.38 – 4.19 (m, 2H), 3.66 (s, 3H), 2.68 – 2.46 (m, 1H), 2.32 – 2.16 (m, 1H).

$^{13}\text{C NMR}$  (76 MHz,  $\text{CDCl}_3$ )  $\{^{19}\text{F}\}$ :  $\delta$  197.8, 165.2, 159.1, 139.1, 134.7, 134.4, 133.9, 133.3, 129.9, 129.7, 129.3, 129.0, 125.6, 125.4, 121.7, 114.9, 63.6, 55.2, 50.2, 32.5.

$^{19}\text{F NMR}$  (282 MHz,  $\text{CDCl}_3$ ):  $\delta$  -63.15, -63.24.

FTIR (neat):  $\nu$  ( $\text{cm}^{-1}$ ) 3044, 2961, 1722, 1686, 1511, 1323, 1122, 775.

HRMS (ESI-TOF)  $m/z$ :  $[\text{M}+\text{Na}^+]$  Calcd for  $\text{C}_{20}\text{H}_{26}\text{F}_6\text{NaO}_4$  533.1163, found: 533.1155.

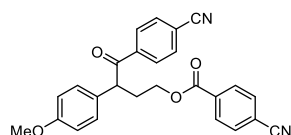

#### 4-(4-Cyanophenyl)-3-(4-methoxyphenyl)-4-oxobutyl 4-cyanobenzoate (3l)

Performed with general procedure D and purified by flash silica column chromatography (pentane/ethyl acetate = 5:1)

Colorless oil (45.0 mg, 53% yield)

$^1\text{H NMR}$  (300 MHz,  $\text{CDCl}_3$ ):  $\delta$  8.01 – 7.87 (m, 4H), 7.68 – 7.57 (m, 4H), 7.12 – 7.03 (m, 2H), 6.79 – 6.71 (m, 2H), 4.53 (t,  $J = 7.2$  Hz, 1H), 4.37 – 4.21 (m, 2H), 3.67 (s, 3H), 2.56 (dt,  $J = 13.6, 7.0$  Hz, 1H), 2.22 (dt,  $J = 13.9, 7.1$  Hz, 1H).

$^{13}\text{C NMR}$  (76 MHz,  $\text{CDCl}_3$ ):  $\delta$  197.4, 164.8, 159.2, 139.4, 133.8, 132.4, 132.2, 130.0, 129.3, 129.2, 129.1, 117.9, 117.8, 116.5, 116.2, 114.9, 63.8, 55.3, 50.4, 32.3.

FTIR (neat):  $\nu$  ( $\text{cm}^{-1}$ ) 2837, 2232, 1721, 1686, 1511, 1325, 1249, 1108, 767.

HRMS (ESI-TOF)  $m/z$ :  $[\text{M}+\text{Na}^+]$  Calcd for  $\text{C}_{26}\text{H}_{20}\text{N}_2\text{NaO}_4$  447.1320, found: 447.1314.

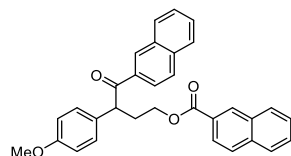

#### 3-(4-Methoxyphenyl)-4-(naphthalen-2-yl)-4-oxobutyl 2-naphthoate (3m)

Performed with general procedure D and purified by flash silica column chromatography (pentane/ethyl acetate = 20:1)



Colorless oil (70.2 mg, 74% yield)

$^1\text{H}$  NMR (300 MHz,  $\text{CDCl}_3$ ):  $\delta$  8.60 – 8.47 (m, 2H), 8.05 (dt,  $J$  = 8.6, 2.1 Hz, 2H), 7.93 – 7.79 (m, 6H), 7.63 – 7.46 (m, 4H), 7.40 – 7.32 (m, 2H), 6.89 – 6.80 (m, 2H), 4.97 (t,  $J$  = 7.2 Hz, 1H), 4.52 – 4.38 (m, 2H), 3.73 (s, 3H), 2.87 – 2.72 (m, 1H), 2.49 – 2.41 (m, 1H).

$^{13}\text{C}$  NMR (76 MHz,  $\text{CDCl}_3$ ):  $\delta$  199.1, 166.6, 158.9, 135.5, 135.5, 133.9, 132.5, 132.4, 131.1, 130.8, 130.5, 129.6, 129.4, 128.5, 128.4, 128.3, 128.1, 127.8, 127.7, 127.5, 126.7, 126.6, 125.2, 124.5, 114.7, 63.4, 55.2, 49.7, 32.9.

FTIR (neat):  $\nu$  ( $\text{cm}^{-1}$ ) 3058, 2936, 1712, 1675, 1510, 1465, 1249, 779.

HRMS (ESI-TOF)  $m/z$ :  $[\text{M}+\text{Na}^+]$  Calcd for  $\text{C}_{32}\text{H}_{26}\text{NaO}_4$  497.1728, found: 497.1721.

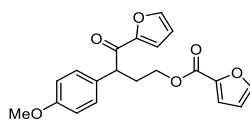

#### **4-(Furan-2-yl)-3-(4-methoxyphenyl)-4-oxobutyl furan-2-carboxylate (3n)**

Performed with general procedure D and purified by flash silica column chromatography (pentane/ethyl acetate = 10:1)

Colorless oil (31.9 mg, 45% yield)

$^1\text{H}$  NMR (500 MHz,  $\text{CDCl}_3$ ):  $\delta$  7.60 – 7.49 (m, 2H), 7.29 – 7.24 (m, 2H), 7.18 – 7.10 (m, 2H), 6.84 – 6.81 (m, 2H), 6.52 – 6.43 (m, 2H), 4.52 (q,  $J$  = 7.8 Hz, 1H), 4.35 – 4.18 (m, 2H), 3.77 (s, 3H), 2.66 – 2.58 (m, 1H), 2.30 – 2.22 (m, 1H).

$^{13}\text{C}$  NMR (126 MHz,  $\text{CDCl}_3$ ):  $\delta$  188.1, 158.9, 158.6, 152.2, 146.4, 146.3, 144.6, 130.0, 129.4, 117.9, 117.8, 114.4, 112.3, 111.8, 62.9, 55.2, 49.5, 31.6.

FTIR (neat):  $\nu$  ( $\text{cm}^{-1}$ ) 2837, 1718, 1671, 1511, 1465, 1295, 1115, 734.

HRMS (ESI-TOF)  $m/z$ :  $[\text{M}+\text{Na}^+]$  Calcd for  $\text{C}_{20}\text{H}_{18}\text{NaO}_6$  377.1001, found: 377.0994.

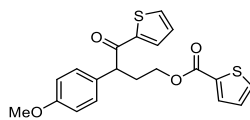

#### **3-(4-Methoxyphenyl)-4-oxo-4-(thiophen-2-yl)butyl thiophene-2-carboxylate (3o)**

Performed with general procedure D and purified by flash silica column chromatography (pentane/ethyl acetate = 10:1)

Yellow oil (47.1 mg, 61% yield)

<sup>1</sup>H NMR (300 MHz, CDCl<sub>3</sub>): δ 7.66 (ddd, *J* = 16.9, 3.8, 1.2 Hz, 2H), 7.48 (dt, *J* = 5.0, 1.0 Hz, 2H), 7.19 (d, *J* = 8.7 Hz, 2H), 7.00 (ddd, *J* = 18.1, 5.0, 3.8 Hz, 2H), 6.82 – 6.69 (m, 2H), 4.48 (t, *J* = 7.4 Hz, 1H), 4.31 – 4.07 (m, 2H), 3.68 (s, 3H), 2.66 – 2.44 (m, 1H), 2.29 – 2.24 (m, 1H).

<sup>13</sup>C NMR (76 MHz, CDCl<sub>3</sub>): δ 192.0, 162.0, 159.0, 143.7, 133.8, 133.7, 133.5, 132.5, 132.4, 130.5, 129.3, 128.1, 127.8, 114.5, 62.9, 55.2, 50.9, 32.4.

FTIR (neat): ν (cm<sup>-1</sup>) 2997, 2836, 1703, 1656, 1510, 1414, 1247, 1099, 721.

HRMS (ESI-TOF) *m/z*: [M+Na<sup>+</sup>] Calcd for C<sub>20</sub>H<sub>18</sub>NaO<sub>4</sub>S<sub>2</sub> 409.0544, found: 409.0538.

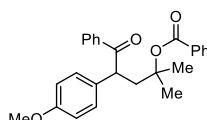

#### 4-(4-Methoxyphenyl)-2-methyl-5-oxo-5-phenylpentan-2-yl benzoate (3p)

Purified by flash silica column chromatography (pentane/ethyl acetate = 20:1)

Colorless oil (68.3 mg, 85% yield)

<sup>1</sup>H NMR (300 MHz, CDCl<sub>3</sub>): δ 7.90 – 7.84 (m, 2H), 7.81 – 7.72 (m, 2H), 7.45 – 7.32 (m, 2H), 7.27 (td, *J* = 7.6, 3.3 Hz, 4H), 7.17 – 7.09 (m, 2H), 6.74 – 6.65 (m, 2H), 4.82 (dd, *J* = 8.1, 4.1 Hz, 1H), 3.62 (s, 3H), 2.96 (dd, *J* = 14.6, 8.0 Hz, 1H), 2.29 (dd, *J* = 14.6, 4.1 Hz, 1H), 1.56 (s, 3H), 1.47 (s, 3H).

<sup>13</sup>C NMR (76 MHz, CDCl<sub>3</sub>): δ 199.4, 165.7, 158.6, 136.7, 132.9, 132.5, 132.0, 131.7, 129.4, 129.3, 128.7, 128.6, 128.1, 114.5, 82.7, 55.2, 47.9, 44.9, 26.7, 26.6.

FTIR (neat): ν (cm<sup>-1</sup>) 3035, 1709, 1685, 1511, 1421, 1292, 1114, 833.

HRMS (ESI-TOF) *m/z*: [M+Na<sup>+</sup>] Calcd for C<sub>26</sub>H<sub>26</sub>NaO<sub>4</sub> 425.1728, found: 425.1719.

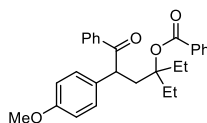

#### 3-Ethyl-5-(4-methoxyphenyl)-6-oxo-6-phenylhexan-3-yl benzoate (3q)

Performed with general procedure D and purified by flash silica column chromatography (pentane/ethyl acetate = 20:1)

Colorless oil (49.1 mg, 57% yield)

<sup>1</sup>H NMR (300 MHz, CDCl<sub>3</sub>): δ 7.87 – 7.73 (m, 4H), 7.45 – 7.34 (m, 3H), 7.27 (dd, *J* = 7.1, 1.3 Hz, 3H), 7.13 (d, *J* = 8.7 Hz, 2H), 6.67 (d, *J* = 8.7 Hz, 2H), 4.75 (dd, *J* = 7.8, 4.3 Hz, 1H), 3.61 (s, 3H), 2.99 (dd, *J* = 14.3, 6.6 Hz, 1H), 2.36 (dd, *J* = 14.9, 4.3 Hz, 1H), 2.04 – 1.81 (m, 4H), 0.82 (t, *J* = 7.5, 3H), 0.78 (t, *J* = 7.5, 3H)

$^{13}\text{C}$  NMR (76 MHz,  $\text{CDCl}_3$ ):  $\delta$  199.2, 165.4, 158.5, 136.7, 132.8, 132.4, 131.9, 131.6, 129.4, 129.3, 128.7, 128.5, 128.1, 114.4, 88.4, 55.2, 47.4, 38.4, 27.9, 27.8, 8.0, 7.8.

FTIR (neat):  $\nu$  ( $\text{cm}^{-1}$ ) 2960, 1713, 1679, 1511, 1428, 1269, 1113, 711.

HRMS (ESI-TOF)  $m/z$ :  $[\text{M}+\text{Na}^+]$  Calcd for  $\text{C}_{28}\text{H}_{30}\text{NaO}_4$  453.2042, found: 453.2035.

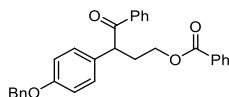

### 3-(4-(Benzyloxy)phenyl)-4-oxo-4-phenylbutyl benzoate (3r)

Performed with general procedure D and purified by flash silica column chromatography (pentane/ethyl acetate = 10:1)

White solid (71.1 mg, 79% yield)

MP: 127-128 °C

$^1\text{H}$  NMR (300 MHz,  $\text{CDCl}_3$ ):  $\delta$  8.05 – 7.89 (m, 4H), 7.64 – 7.33 (m, 11H), 7.33 – 7.22 (m, 2H), 7.02 – 6.89 (m, 2H), 5.01 (s, 2H), 4.78 (t,  $J = 7.3$  Hz, 1H), 4.51 – 4.24 (m, 2H), 2.69 – 2.65 (m, 1H), 2.36 – 2.29 (m, 1H).

$^{13}\text{C}$  NMR (76 MHz,  $\text{CDCl}_3$ ):  $\delta$  199.1, 166.5, 158.2, 136.9, 136.5, 132.9, 130.8, 130.2, 129.6, 129.4, 128.8, 128.6, 128.5, 128.4, 128.0, 127.5, 115.5, 70.0, 63.1, 49.5, 32.7.

FTIR (neat):  $\nu$  ( $\text{cm}^{-1}$ ) 3055, 2920, 1737, 1612, 1515, 1496, 1245, 732.

HRMS (ESI-TOF)  $m/z$ :  $[\text{M}+\text{Na}^+]$  Calcd for  $\text{C}_{30}\text{H}_{26}\text{NaO}_4$  473.1728, found: 473.1719.

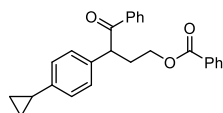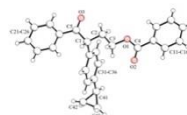

CCDC: 2094400

### 3-(4-Cyclopropylphenyl)-4-oxo-4-phenylbutyl benzoate (3s)

Performed with general procedure D and purified by flash silica column chromatography (pentane/ethyl acetate = 30:1)

White solid (49.2 mg, 64% yield)

MP: 108-109 °C

$^1\text{H}$  NMR (300 MHz,  $\text{CDCl}_3$ ):  $\delta$  7.88 (ddd,  $J = 8.6, 6.1, 1.4$  Hz, 4H), 7.49 – 7.26 (m, 6H), 7.12 (d,  $J = 6.2$  Hz, 2H), 6.99 – 6.86 (m, 2H), 4.67 (t,  $J = 7.3$  Hz, 1H), 4.35 – 4.16 (m, 2H), 2.69 – 2.45 (m, 1H), 2.21 (ddt,  $J = 13.8, 7.8, 5.8$  Hz, 1H), 1.72 (td,  $J = 8.4, 4.2$  Hz, 1H), 0.83 (ddd,  $J = 8.6, 4.2, 1.5$  Hz, 2H), 0.57 – 0.51 (m, 2H).

$^{13}\text{C}$  NMR (76 MHz,  $\text{CDCl}_3$ ):  $\delta$  198.9, 166.5, 143.2, 136.5, 135.5, 132.9, 132.9, 130.2, 129.6, 128.8, 128.5, 128.4, 128.2, 126.4, 63.1, 50.0, 32.7, 15.0, 9.3, 9.2.

FTIR (neat):  $\nu$  ( $\text{cm}^{-1}$ ) 2837, 1721, 1686, 1511, 1375, 1249, 1108, 767.

HRMS (ESI-TOF)  $m/z$ :  $[\text{M}+\text{Na}^+]$  Calcd for  $\text{C}_{26}\text{H}_{24}\text{NaO}_3$  407.1623, found: 407.1618.

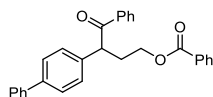

### 3-([1,1'-Biphenyl]-4-yl)-4-oxo-4-phenylbutyl benzoate (3t)

Performed with general procedure D and purified by flash silica column chromatography (pentane/ethyl acetate = 30:1)

White solid (57.2 mg, 68% yield)

MP: 113-114 °C.

$^1\text{H}$  NMR (599 MHz,  $\text{CDCl}_3$ ):  $\delta$  8.03 – 7.93 (m, 4H), 7.56 – 7.47 (m, 6H), 7.44 – 7.36 (m, 8H), 7.36 – 7.28 (m, 1H), 4.84 (t,  $J$  = 7.2 Hz, 1H), 4.42 – 4.28 (m, 2H), 2.78 – 2.65 (m, 1H), 2.45 – 2.30 (m, 1H).

$^{13}\text{C}$  NMR (151 MHz,  $\text{CDCl}_3$ ):  $\delta$  198.8, 166.4, 140.5, 140.3, 137.6, 136.4, 133.1, 132.9, 130.2, 129.5, 128.8, 128.7, 128.6, 128.5, 128.4, 127.9, 127.3, 126.9, 63.1, 50.1, 32.8.

FTIR (neat):  $\nu$  ( $\text{cm}^{-1}$ ) 3061, 3026, 2928, 1715, 1680, 1486, 1449, 1270, 1113, 710.

HRMS (ESI-TOF)  $m/z$ :  $[\text{M}+\text{Na}^+]$  Calcd for  $\text{C}_{29}\text{H}_{24}\text{NaO}_3$  443.1623, found: 443.1616.

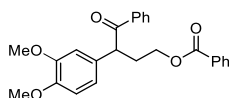

### 3-(3,4-Dimethoxyphenyl)-4-oxo-4-phenylbutyl benzoate (3u)

Performed with general procedure D and purified by flash silica column chromatography (pentane/ethyl acetate = 10:1)

Colorless oil (49.3 mg, 61% yield)

$^1\text{H}$  NMR (300 MHz,  $\text{CDCl}_3$ ):  $\delta$  7.97 – 7.82 (m, 4H), 7.50 – 7.29 (m, 6H), 6.82 – 6.59 (m, 3H), 4.65 (t,  $J$  = 7.3 Hz, 1H), 4.31 – 4.16 (m, 2H), 3.76 (s, 3H), 3.75 (s, 3H), 2.61 – 2.54 (m, 1H), 2.40 – 2.04 (m, 1H).

$^{13}\text{C}$  NMR (76 MHz,  $\text{CDCl}_3$ ):  $\delta$  199.1, 166.4, 149.5, 148.4, 136.5, 132.9, 132.9, 129.7, 129.6, 129.5, 128.7, 128.5, 128.4, 120.9, 111.6, 110.8, 63.0, 55.9, 55.8, 50.0, 32.7.

FTIR (neat):  $\nu$  ( $\text{cm}^{-1}$ ) 2935, 1715, 1679, 1515, 1450, 1262, 1155, 712.

HRMS (ESI-TOF)  $m/z$ :  $[M+Na^+]$  Calcd for  $C_{25}H_{24}NaO_5$  427.1521, found: 427.1512.

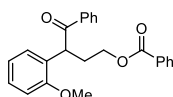

### 3-(2-Methoxyphenyl)-4-oxo-4-phenylbutyl benzoate (3v)

Performed with general procedure D and purified by flash silica column chromatography (pentane/ethyl acetate = 10:1)

Colorless oil (53.9 mg, 72% yield)

$^1H$  NMR (500 MHz,  $CDCl_3$ ):  $\delta$  8.07 – 7.91 (m, 4H), 7.61 – 7.53 (m, 1H), 7.49 – 7.41 (m, 3H), 7.38 – 7.33 (m, 2H), 7.22 – 7.12 (m, 2H), 6.87 (ddd,  $J$  = 8.4, 5.9, 1.2 Hz, 2H), 5.32 (dd,  $J$  = 7.8, 6.4 Hz, 1H), 4.36 – 4.24 (m, 2H), 3.81 (s, 3H), 2.71 – 2.62 (m, 1H), 2.29 – 2.21 (m, 1H).

$^{13}C$  NMR (126 MHz,  $CDCl_3$ ):  $\delta$  199.7, 166.5, 156.1, 136.4, 132.8, 132.7, 130.4, 129.5, 128.6, 128.5, 128.4, 128.3, 128.2, 127.4, 121.2, 110.9, 63.2, 55.5, 42.3, 31.8.

FTIR (neat):  $\nu$  ( $cm^{-1}$ ) 3066, 2837, 1721, 1682, 1603, 1511, 1249, 1176, 711.

HRMS (ESI-TOF)  $m/z$ :  $[M+Na^+]$  Calcd for  $C_{24}H_{22}NaO_4$  397.1415; found: 397.1409.

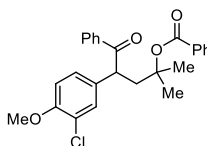

### 4-(3-Chloro-4-methoxyphenyl)-2-methyl-5-oxo-5-phenylpentan-2-yl benzoate (3y)

Performed with general procedure D and purified by flash silica column chromatography (pentane/ethyl acetate = 20:1)

Colorless oil (51.6 mg, 59% yield)

$^1H$  NMR (300 MHz,  $CDCl_3$ ):  $\delta$  8.01 – 7.89 (m, 2H), 7.89 – 7.79 (m, 2H), 7.61 – 7.46 (m, 2H), 7.46 – 7.33 (m, 5H), 7.17 (dd,  $J$  = 8.5, 2.3 Hz, 1H), 6.78 (d,  $J$  = 8.6 Hz, 1H), 4.88 (dd,  $J$  = 7.7, 4.5 Hz, 1H), 3.80 (s, 3H), 2.98 (dd,  $J$  = 14.7, 7.8 Hz, 1H), 2.44 (dd,  $J$  = 14.7, 4.5 Hz, 1H), 1.66 (s, 3H), 1.57 (s, 3H).

$^{13}C$  NMR (76 MHz,  $CDCl_3$ ):  $\delta$  198.9, 165.6, 154.0, 136.3, 133.1, 132.9, 132.6, 131.5, 130.2, 129.9, 129.4, 128.7, 128.5, 127.5, 122.8, 112.5, 82.5, 56.1, 47.5, 44.6, 26.8, 26.6.

FTIR (neat):  $\nu$  ( $cm^{-1}$ ) 3062, 2975, 1709, 1682, 1501, 1283, 1111, 771.

HRMS (ESI-TOF)  $m/z$ :  $[M+Na^+]$  Calcd for  $C_{26}H_{25}ClNaO_4$  459.1339, found: 459.1330.

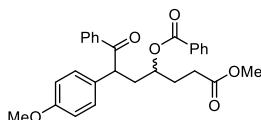

### 7-Methoxy-2-(4-methoxyphenyl)-1,7-dioxo-1-phenylheptan-4-yl benzoate (3z)

Performed with general procedure D and purified by flash silica column chromatography (pentane/ethyl acetate = 5:1) as inseparable mixture of diastereoisomers (dr = 1.1:1)

Yellow oil (50.7 mg, 55% yield)

$^1\text{H}$  NMR (300 MHz,  $\text{CDCl}_3$ ): (mixture of diastereoisomers)  $\delta$  8.03 – 7.82 (m, 4H), 7.61 – 7.53 (m, 1H), 7.47 – 7.30 (m, 5H), 7.23 – 7.15 (m, 2H), 6.87 – 6.78 (m, 1H), 6.79 – 6.71 (m, 1H), 5.26 – 5.07 (m, 1H), 4.67 (dt,  $J = 8.5, 5.8$  Hz, 1H), [3.76 (s) + 3.69 (s), 3H] + [3.61 (s) + 3.58 (s), 3H], 2.72 – 2.55 (m, 1H), 2.47 – 2.33 (m, 2H), 2.26 – 1.99 (m, 3H).

$^{13}\text{C}$  NMR (76 MHz,  $\text{CDCl}_3$ ): (mixture of diastereoisomers)  $\delta$  199.1, 198.9, 173.4, 173.3, 166.1, 166.0, 158.8, 158.7, 136.5, 136.2, 133.0, 132.9, 132.8, 130.9, 130.4, 130.0, 129.9, 129.6, 129.5, 129.4, 129.1, 128.7, 128.5, 128.4, 128.4, 128.3, 128.2, 114.6, 114.5, 72.8, 72.0, 55.2, 55.1, 51.7, 51.6, 49.2, 49.1, 38.5, 38.2, 30.0, 29.9, 29.8.

FTIR (neat):  $\nu$  ( $\text{cm}^{-1}$ ) 2983, 1737, 1681, 1448, 1373, 1233, 1044, 711.

HRMS (ESI-TOF)  $m/z$ :  $[\text{M}+\text{Na}^+]$  Calcd for  $\text{C}_{28}\text{H}_{28}\text{NaO}_6$  483.1783, found: 483.1778.

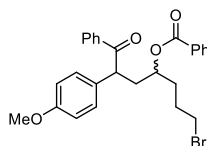

### 7-Bromo-2-(4-methoxyphenyl)-1-oxo-1-phenylheptan-4-yl benzoate (3aa)

Performed with general procedure D and purified by flash silica column chromatography (pentane/ethyl acetate = 20:1) as inseparable mixture of diastereoisomers (dr = 1.3:1)

Colorless oil (56.5 mg, 57% yield)

$^1\text{H}$  NMR (300 MHz,  $\text{CDCl}_3$ ): (mixture of diastereoisomers)  $\delta$  7.99 – 7.74 (m, 4H), 7.53 – 7.17 (m, 6H), 7.15 – 7.04 (m, 2H), 6.75 – 6.62 (m, 2H), 5.18 – 4.95 (m, 1H), 4.62 – 4.56 (m, 1H), [3.66 (s) + 3.59 (s), 3H], 3.36 – 3.24 (m, 2H), 2.64 – 2.44 (m, 1H), 2.22 – 2.02 (m, 1H), 1.91 – 1.62 (m, 4H).

$^{13}\text{C}$  NMR (76 MHz,  $\text{CDCl}_3$ ): (mixture of diastereoisomers)  $\delta$  199.2, 199.0, 166.2, 166.1, 158.9, 158.7, 136.5, 136.2, 133.1, 132.9, 132.8, 131.1, 130.4, 130.2, 130.1, 129.6, 129.5, 129.4, 129.1, 128.7, 128.5, 128.4, 128.4, 128.3, 114.6, 114.5, 72.7, 72.1, 55.2, 55.1, 49.3, 49.2, 38.6, 38.3, 33.6, 33.5, 33.4, 33.3, 28.4, 28.3.

FTIR (neat):  $\nu$  ( $\text{cm}^{-1}$ ) 2837, 1712, 1678, 1510, 1269, 1178, 711.

HRMS (ESI-TOF)  $m/z$ :  $[\text{M}+\text{Na}^+]$  Calcd for  $\text{C}_{27}\text{H}_{27}\text{BrNaO}_4$  517.0990, found: 517.0984.

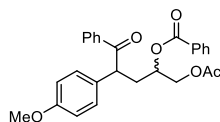

### 1-Acetoxy-4-(4-methoxyphenyl)-5-oxo-5-phenylpentan-2-yl benzoate (3ab)

Performed with general procedure D and purified by flash silica column chromatography (pentane/ethyl acetate = 10:1) as inseparable mixture of diastereoisomers (dr = 1.4:1)

Yellow oil (36.6 mg, 41% yield)

$^1\text{H}$  NMR (300 MHz,  $\text{CDCl}_3$ ): (mixture of diastereoisomers)  $\delta$  7.95 – 7.78 (m, 5H), 7.34 – 7.28 (m, 5H), 7.11 (d,  $J$  = 8.4 Hz, 2H), 6.76 – 6.67 (m, 2H), 5.33 – 5.08 (m, 1H), 4.62 (dt,  $J$  = 14.1, 7.7 Hz, 1H), 4.26 – 4.08 (m, 2H), 3.68 – 3.60 (m, 3H), 2.57 (dd,  $J$  = 13.0, 5.9 Hz, 1H), 2.23 – 2.08 (m, 1H), 1.96 – 1.91 (m, 3H).

$^{13}\text{C}$  NMR (151 MHz,  $\text{CDCl}_3$ ): (mixture of diastereoisomers)  $\delta$  198.9, 198.7, 170.7, 170.6, 165.9, 165.8, 158.9, 158.8, 136.3, 136.1, 133.1, 133.0, 132.9, 132.8, 130.7, 130.0, 129.9, 129.8, 129.7, 129.6, 129.5, 129.5, 129.4, 129.1, 128.7, 128.7, 128.6, 128.6, 128.5, 128.4, 128.4, 128.4, 128.3, 128.3, 128.2, 114.7, 114.6, 114.6, 114.5, 71.0, 70.3, 65.3, 65.1, 55.2, 55.1, 49.1, 48.9, 35.0, 34.9, 20.8, 20.7.

FTIR (neat):  $\nu$  ( $\text{cm}^{-1}$ ) 2837, 1741, 1717, 1660, 1510, 1449, 1248, 1109, 712.

HRMS (ESI-TOF)  $m/z$ :  $[\text{M}+\text{Na}^+]$  Calcd for  $\text{C}_{27}\text{H}_{26}\text{NaO}_6$  469.1627, found: 469.1620.

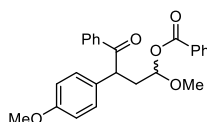

### 4-(4-Methoxyphenyl)-2-methyl-5-oxo-5-phenylpentan-2-yl benzoate (3ac)

Performed with general procedure D and purified by flash silica column chromatography (pentane/ethyl acetate = 10:1) as inseparable mixture of diastereoisomers (dr = 1.2:1)

Colorless oil (42.9 mg, 53% yield)

$^1\text{H}$  NMR (300 MHz,  $\text{CDCl}_3$ ): (mixture of diastereoisomers)  $\delta$  8.03 – 7.76 (m, 4H), 7.57 – 7.24 (m, 6H), 7.16 – 7.08 (m, 2H), 6.89 – 6.62 (m, 2H), [5.95 (t,  $J$  = 5.3 Hz, minor diastereoisomers) + 5.76 (dd,  $J$  = 7.0, 4.0 Hz, major diastereoisomers) 1H], 4.75 (dt,  $J$  = 7.7, 6.1 Hz, 1H), 3.66 (s, 3H), [3.37 (s) + 3.32 (s) 3H], 2.85 – 2.50 (m, 1H), 2.38 – 2.20 (m, 1H).

$^{13}\text{C}$  NMR (126 MHz,  $\text{CD}_2\text{Cl}_2+\text{CDCl}_3$ ): (mixture of diastereoisomers)  $\delta$  198.8, 198.7, 165.9, 158.9, 136.4, 133.2, 133.1, 132.8, 132.7, 130.9, 130.3, 130.0, 129.9, 129.7, 129.6, 129.4, 129.3, 128.7, 128.6, 128.5, 128.4, 128.4, 128.3, 128.3, 114.4, 114.3, 99.1, 98.5, 56.7, 56.6, 48.3, 47.7, 47.6, 46.8, 38.3, 37.8.

FTIR (neat):  $\nu$  (cm<sup>-1</sup>) 3063, 2938, 1717, 1680, 1510, 1449, 1248, 1176, 711.

HRMS (ESI-TOF)  $m/z$ : [M+Na<sup>+</sup>] Calcd for C<sub>25</sub>H<sub>24</sub>NaO<sub>5</sub> 427.1521, found: 427.1509.

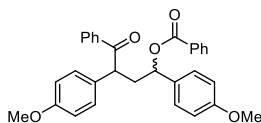

### 1,3-Bis(4-methoxyphenyl)-4-oxo-4-phenylbutyl benzoate (3ad)

Performed with general procedure D and purified by flash silica column chromatography (pentane/ethyl acetate = 10:1) as inseparable mixture of diastereoisomers (1.3:1 dr)

Colorless oil (63.4 mg, 66% yield)

<sup>1</sup>H NMR (300 MHz, CDCl<sub>3</sub>): (mixture of diastereoisomers)  $\delta$  8.09 – 7.93 (m, 2H), 7.87 (ddt,  $J$  = 11.3, 7.1, 1.4 Hz, 2H), 7.60 – 7.50 (m, 1H), 7.49 – 7.30 (m, 7H), 7.23 – 7.17 (m, 2H), 6.95 – 6.78 (m, 4H), 5.97 – 5.73 (m, 1H), 4.80 – 4.40 (m, 1H), [3.83 (s) + 3.79 (s), 3H], [3.77 (s) + 3.74 (s), 3H], 3.08 – 2.77 (m, 1H), 2.68 – 2.33 (m, 1H).

<sup>13</sup>C NMR (76 MHz, CDCl<sub>3</sub>): (mixture of diastereoisomers)  $\delta$  199.1, 198.9, 165.7, 165.6, 159.5, 159.4, 158.8, 158.7, 136.4, 132.9, 132.9, 132.8, 132.7, 132.2, 130.5, 130.5, 130.4, 130.3, 129.6, 129.6, 129.4, 128.7, 128.5, 128.3, 128.2, 128.1, 127.8, 114.6, 114.5, 114.0, 113.9, 74.9, 74.5, 55.3, 55.2, 55.1, 55.0, 49.4, 49.1, 40.6, 40.0.

FTIR (neat):  $\nu$  (cm<sup>-1</sup>) 3061, 2837, 1715, 1679, 1510, 1449, 1245, 711.

HRMS (ESI-TOF)  $m/z$ : [M+Na<sup>+</sup>] Calcd for C<sub>31</sub>H<sub>28</sub>NaO<sub>5</sub> 503.1834, found: 503.1830.

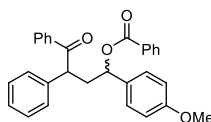

### 1-(4-Methoxyphenyl)-4-oxo-3,4-diphenylbutyl benzoate (3ae)

Performed with general procedure D and purified by flash silica column chromatography (pentane/ethyl acetate = 20:1) as inseparable diastereoisomeric (1.3:1 dr) and regioisomeric (3:1 rr) mixture.

Colorless oil (53.2 mg, 59% yield)

<sup>1</sup>H NMR (300 MHz, CDCl<sub>3</sub>): (mixture of diastereoisomers and regioisomer)  $\delta$  8.23 – 7.63 (m, 5H), 7.59 – 7.30 (m, 10H), 7.24 – 6.77 (m, 4H), 6.02 – 5.73 (m, 1H), 4.78 – 4.59 (m, 1H), [3.83 (s, major diastereoisomer) + 3.79 (s, minor diastereoisomer) + 3.77 (s, regioisomer) + 3.74 (s, regioisomer), 3H], 3.13 – 2.81 (m, 1H), 2.67 – 2.30 (m, 1H).



$^{13}\text{C}$  NMR (76 MHz,  $\text{CDCl}_3$ ): (mixture of diastereoisomers and regioisomer)  $\delta$  198.9, 198.8, 165.7, 165.6, 159.5, 159.4, 138.7, 136.4, 132.9, 132.8, 132.5, 132.2, 130.3, 129.7, 129.6, 129.4, 129.3, 129.2, 129.1, 128.7, 128.6, 128.5, 128.4, 128.3, 128.2, 128.1, 128.1, 127.8, 127.4, 127.3, 126.6, 114.5, 114.0, 113.9, 74.9, 74.6, 55.3, 55.2, 50.3, 49.9, 40.6, 40.2.

FTIR (neat):  $\nu$  ( $\text{cm}^{-1}$ ) 3062, 1715, 1679, 1513, 1448, 1247, 1175, 699.

HRMS (ESI-TOF)  $m/z$ :  $[\text{M}+\text{Na}^+]$  Calcd for  $\text{C}_{30}\text{H}_{26}\text{NaO}_4$  473.1729, found: 473.1723.

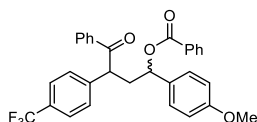

### 1-(4-Methoxyphenyl)-4-oxo-4-phenyl-3-(4-(trifluoromethyl)phenyl)butyl benzoate (3af)

Performed with general procedure D and purified by flash silica column chromatography (pentane/ethyl acetate = 20:1) as inseparable diastereoisomeric (1.2:1 dr) and regioisomeric (7:1 rr) mixture.

Yellow oil (63.2 mg, 61% yield)

$^1\text{H}$  NMR (300 MHz,  $\text{CDCl}_3$ ): (mixture of diastereoisomers and regioisomer)  $\delta$  7.94 – 7.74 (m, 4H), 7.49 – 7.17 (m, 12H), 6.89 – 6.71 (m, 2H), 5.97 – 5.71 (m, 1H), 4.68 (dt,  $J = 22.3, 7.0$  Hz, 1H), [3.72 (s, major diastereoisomer) + 3.68 (s, minor diastereoisomer) + 3.66 (s, regioisomer) + 3.62 (s, regioisomer), 3H], 3.07 – 2.71 (m, 1H), 2.62 – 2.27 (m, 1H).

$^{13}\text{C}$  NMR (76 MHz,  $\text{CDCl}_3$ )  $\{^{19}\text{F}\}$ : (mixture of diastereoisomers and regioisomer)  $\delta$  198.3, 198.2, 165.7, 165.6, 159.6, 159.5, 142.7, 135.9, 133.4, 133.3, 133.1, 133.0, 132.1, 131.8, 130.1, 130.0, 129.7, 129.6, 129.5, 128.8, 128.7, 128.6, 128.5, 128.5, 128.4, 128.3, 128.3, 128.0, 127.8, 126.1, 126.0, 125.9, 114.1, 114.0, 74.8, 74.4, 55.3, 55.2, 49.9, 40.5, 40.1.

$^{19}\text{F}$  NMR (282 MHz,  $\text{CDCl}_3$ ): (mixture of diastereoisomers)  $\delta$  -62.54, -62.56.

FTIR (neat):  $\nu$  ( $\text{cm}^{-1}$ ) 2963, 1717, 1681, 1514, 1450, 1327, 1247, 1109, 711.

HRMS (ESI-TOF)  $m/z$ :  $[\text{M}+\text{Na}^+]$  Calcd for  $\text{C}_{31}\text{H}_{25}\text{F}_3\text{NaO}_4$  541.1603, found: 541.1597.

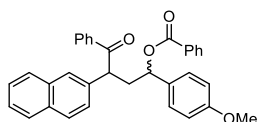

### 1-(4-Methoxyphenyl)-3-(naphthalen-2-yl)-4-oxo-4-phenylbutyl benzoate (3ag)

Performed with general procedure D and purified by flash silica column chromatography (pentane/ethyl acetate = 20:1) as inseparable diastereoisomeric (dr = 1.2:1) and regioisomeric (4:1 rr)

mixture.

Yellow oil (55.1 mg, 55% yield)

$^1\text{H}$  NMR (300 MHz,  $\text{CDCl}_3$ ): (mixture of diastereoisomers and regioisomer)  $\delta$  7.93 – 7.88 (m, 1H), 7.84 – 7.66 (m, 6H), 7.47 – 7.19 (m, 12H), 6.85 – 6.79 (m, 1H), 6.77 – 6.70 (m, 1H), 5.83 (ddd,  $J = 13.9, 8.6, 5.2$  Hz, 1H), 4.75 (dt,  $J = 23.5, 7.0$  Hz, 1H), [3.71 (s, major diastereoisomer) + 3.66 (s, minor diastereoisomer) + 3.65 (s, regioisomer) + 3.62 (s, regioisomer) 3H], 3.11 – 2.81 (m, 1H), 2.70 – 2.34 (m, 1H).

$^{13}\text{C}$  NMR (76 MHz,  $\text{CDCl}_3$ ): (mixture of diastereoisomers and regioisomer)  $\delta$  198.9, 198.7, 165.7, 165.6, 159.5, 159.4, 136.4, 136.2, 136.1, 133.7, 133.6, 133.0, 132.9, 132.6, 132.5, 132.5, 132.2, 130.3, 130.2, 129.7, 129.6, 129.6, 129.5, 129.4, 129.1, 129.0, 128.8, 128.7, 128.5, 128.4, 128.4, 128.3, 128.3, 128.2, 128.1, 127.9, 127.8, 127.7, 127.6, 127.4, 127.3, 126.3, 126.2, 126.1, 126.0, 126.0, 114.6, 114.0, 113.9, 75.0, 74.6, 55.3, 55.3, 50.4, 50.3, 40.6, 40.2.

FTIR (neat):  $\nu$  ( $\text{cm}^{-1}$ ) 3061, 2962, 1716, 1680, 1513, 1267, 711.

HRMS (ESI-TOF)  $m/z$ :  $[\text{M}+\text{Na}^+]$  Calcd for  $\text{C}_{34}\text{H}_{28}\text{NaO}_4$  523.1885, found: 523.1881.

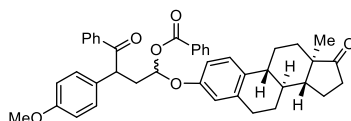

**3-(4-Methoxyphenyl)-1-(((8S,9R,13R,14R)-13-methyl-17-oxo-7,8,9,11,12,13,14,15,16,17-decahydro-6H-cyclopenta[a]phenanthren-3-yl)oxy)-4-oxo-4-phenylbutyl benzoate (3ah)**

Performed with general procedure D and purified by flash silica column chromatography (pentane/ethyl acetate = 5:1) as inseparable mixture of diastereoisomers (dr = 1:1)

Brown oil (66.8 mg, 52% yield)

$^1\text{H}$  NMR (300 MHz,  $\text{CDCl}_3$ ): (mixture of diastereoisomers)  $\delta$  8.04 (dt,  $J = 7.1, 1.4$  Hz, 1H), 7.92 – 7.85 (m, 2H), 7.68 – 7.46 (m, 1H), 7.49 – 7.26 (m, 4H), 7.18 – 7.05 (m, 4H), 6.84 – 6.45 (m, 5H), [5.72 (td,  $J = 5.2, 1.9$  Hz) + 5.50 (td,  $J = 5.2, 1.6$  Hz) 1H], 4.80 (q,  $J = 7.5$  Hz, 1H), [3.67 (s) + 3.66 (s), 3H], 2.76 (dq,  $J = 9.4, 4.3$  Hz, 3H), 2.41 – 1.88 (m, 9H), 1.49 – 1.37 (m, 5H), 0.82 (d,  $J = 7.4$  Hz, 3H).

$^{13}\text{C}$  NMR (76 MHz,  $\text{CDCl}_3$ ): (mixture of diastereoisomers)  $\delta$  221.2, 221.1, 221.0, 198.8, 198.7, 158.9, 154.4, 154.3, 138.1, 138.0, 138.0, 137.9, 136.3, 136.2, 134.9, 134.8, 133.7, 133.1, 133.0, 130.2, 130.1, 129.4, 129.3, 128.9, 128.8, 128.6, 128.5, 128.4, 126.5, 126.4, 117.3, 117.2, 115.3, 114.7, 114.6, 114.5, 112.9, 110.6, 107.7, 55.2, 50.4, 50.3, 48.1, 48.0, 48.0, 47.6, 47.5, 47.4, 44.1, 44.0, 43.9, 38.4, 38.2, 35.9, 31.6, 31.5, 29.6, 29.5, 29.5, 26.5, 26.4, 26.4, 25.9, 25.9, 25.8, 21.6, 21.6, 13.9, 13.8.

FTIR (neat):  $\nu$  ( $\text{cm}^{-1}$ ) 2931, 2837, 1722, 1680, 1511, 1448, 1246, 1176, 695.

HRMS (ESI-TOF)  $m/z$ :  $[M+\text{Na}^+]$  Calcd for  $\text{C}_{42}\text{H}_{42}\text{NaO}_6$  665.2879, found: 665.2879.

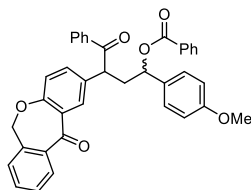

**1-(4-Methoxyphenyl)-4-oxo-3-(11-oxo-6,11-dihydrodibenzo[b,e]oxepin-2-yl)-4-phenylbutyl benzoate (3ai)**

Performed with general procedure D and purified by flash silica column chromatography (pentane/ethyl acetate = 10:1) as inseparable inseparable diastereoisomeric ( $dr = 1.1:1$ ) and regioisomeric (1.7:1  $rr$ ) mixture.

Yellow oil (66.8 mg, 61% yield)

$^1\text{H}$  NMR (300 MHz,  $\text{CDCl}_3$ ): (mixture of diastereoisomers and regioisomer)  $\delta$  8.39 – 7.86 (m, 6H), 7.61 – 7.31 (m, 12H), 7.07 – 6.77 (m, 3H), 6.01 – 5.79 (m, 1H), 5.16 (dd,  $J = 14.1, 7.7$  Hz, 2H), 4.89 – 4.55 (m, 1H), [3.83 (s, major diastereoisomer) + 3.78 (s, minor diastereoisomer) + 3.76 (s, regioisomer) + 3.74 (s, regioisomer) 3H], 3.14 – 2.79 (m, 1H), 2.69 – 2.39 (m, 1H).

$^{13}\text{C}$  NMR (76 MHz,  $\text{CDCl}_3$ ): (mixture of diastereoisomers and regioisomer)  $\delta$  198.9, 198.8, 198.7, 190.8, 190.7, 165.7, 165.6, 165.6, 161.1, 160.9, 160.6, 160.5, 159.5, 159.4, 158.9, 158.8, 140.5, 140.4, 140.3, 136.3, 136.1, 135.4, 135.4, 134.8, 134.7, 134.5, 134.1, 133.5, 133.1, 133.0, 132.9, 132.9, 132.8, 132.8, 132.7, 132.4, 132.3, 132.1, 131.9, 131.8, 130.6, 130.2, 130.1, 130.0, 129.9, 129.7, 129.7, 129.6, 129.6, 129.5, 129.5, 129.4, 129.3, 129.3, 129.2, 128.9, 128.8, 128.7, 128.7, 128.6, 128.5, 128.4, 128.4, 128.3, 128.2, 128.1, 127.9, 127.9, 127.8, 127.7, 125.5, 125.4, 125.2, 125.1, 121.8, 121.7, 121.2, 121.1, 114.7, 114.6, 114.1, 114.0, 74.8, 74.7, 74.6, 74.1, 73.6, 73.5, 73.5, 55.3, 55.2, 55.2, 49.4, 49.2, 49.0, 48.9, 40.5, 40.4, 40.2, 40.1.

FTIR (neat):  $\nu$  ( $\text{cm}^{-1}$ ) 2831, 1711, 1680, 1648, 1513, 1486, 1360, 1265, 1248, 1109, 711.

HRMS (ESI-TOF)  $m/z$ :  $[M+\text{Na}^+]$  Calcd for  $\text{C}_{38}\text{H}_{30}\text{NaO}_6$  605.1940, found: 605.1939.

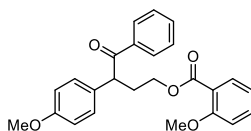

**3-(4-Methoxyphenyl)-4-oxo-4-phenylbutyl 2-methoxybenzoate (3aj)**

Performed with general procedure E and purified by flash silica column chromatography (pentane/ethyl acetate = 10:1)

Colorless oil (29.1 mg, 36% yield)

$^1\text{H}$  NMR (500 MHz,  $\text{CDCl}_3$ ):  $\delta$  7.99 – 7.93 (m, 2H), 7.74 (dd,  $J = 7.9, 1.7$  Hz, 1H), 7.50 – 7.45 (m, 2H), 7.38 (dd,  $J = 8.3, 7.1$  Hz, 2H), 7.27 – 7.20 (m, 2H), 6.99 (d,  $J = 7.9$  Hz, 2H), 6.87 – 6.82 (m, 2H), 4.81 (dd,  $J = 8.0, 6.5$  Hz, 1H), 4.33 (dt,  $J = 11.3, 5.7$  Hz, 1H), 4.25 – 4.22 (m, 1H), 3.90 (s, 3H), 3.76 (s, 3H), 2.73 – 2.53 (m, 1H), 2.35 – 2.21 (m, 1H).

$^{13}\text{C}$  NMR (126 MHz,  $\text{CDCl}_3$ ):  $\delta$  199.3, 166.3, 159.1, 158.8, 136.6, 133.5, 132.8, 131.6, 130.6, 129.4, 128.8, 128.5, 120.3, 120.2, 114.6, 112.0, 62.7, 55.9, 55.2, 49.3, 32.7.

FTIR (neat):  $\nu$  ( $\text{cm}^{-1}$ ) 2963, 2831, 1727, 1685, 1512, 1180, 757.

HRMS (ESI-TOF)  $m/z$ :  $[\text{M}+\text{Na}^+]$  Calcd for  $\text{C}_{25}\text{H}_{24}\text{NaO}_5$  427.1521, found: 427.1509.

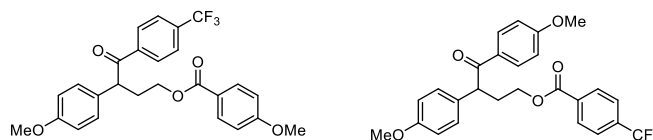

**3-(4-Methoxyphenyl)-4-oxo-4-(4-(trifluoromethyl)phenyl)butyl 4-methoxybenzoate or 3,4-bis(4-methoxyphenyl)-4-oxobutyl 4-(trifluoromethyl)benzoate (3ak)**

Performed with general procedure E and purified by flash silica column chromatography (pentane/ethyl acetate = 10:1) as inseparable mixture of regioisomer (1.8:1 rr).

Colorless oil (40.6 mg, 43% yield)

$^1\text{H}$  NMR (300 MHz,  $\text{CDCl}_3$ ): (mixture of regioisomer)  $\delta$  8.01 – 7.83 (m, 4H), 7.61 – 7.52 (m, 2H), 7.13 (t,  $J = 8.7$  Hz, 2H), 6.86 – 6.73 (m, 4H), 4.60 (q,  $J = 7.8$  Hz, 1H), 4.34 – 4.10 (m, 2H), [3.79 (s, major regioisomer) + 3.74 (s, minor regioisomer) + 3.67 (s, major regioisomer) + 3.66 (s, minor regioisomer), 6H], 2.61 – 2.54 (m, 1H), 2.25 – 2.51 (m, 1H).

$^{13}\text{C}$  NMR (151 MHz,  $\text{CDCl}_3$ )  $\{^{19}\text{F}\}$ : (mixture of regioisomer)  $\delta$  198.1, 197.4, 166.2, 165.2, 163.4, 163.3, 159.0, 158.8, 139.2, 134.4, 134.0, 133.4, 131.5, 131.0, 130.9, 129.9, 129.9, 129.8, 129.8, 129.3, 129.2, 129.0, 125.5, 125.3, 125.2, 123.6, 123.5, 122.5, 114.8, 114.6, 113.7, 113.6, 63.9, 62.5, 55.4, 55.4, 55.2, 55.2, 50.1, 49.3, 32.7, 33.6.

$^{19}\text{F}$  NMR (564 MHz,  $\text{CDCl}_3$ ): (mixture of regioisomer)  $\delta$  -63.13, -63.23.

FTIR (neat):  $\nu$  ( $\text{cm}^{-1}$ ) 2909, 1718, 1686, 1606, 1512, 1325, 1168, 771.

HRMS (ESI-TOF)  $m/z$ :  $[\text{M}+\text{Na}^+]$  Calcd for  $\text{C}_{26}\text{H}_{23}\text{F}_3\text{NaO}_5$  495.1395, found: 495.1387.

## Regioselectivities Determination of Unsymmetrical Diaryl Cyclopropanes

The regioselectivities of **3ae-3ag** was determinate by further derivatization (see below) and confirmed by comparison with the  $^1\text{H}$  NMR of related known compounds or similar structures.<sup>[6-7]</sup>

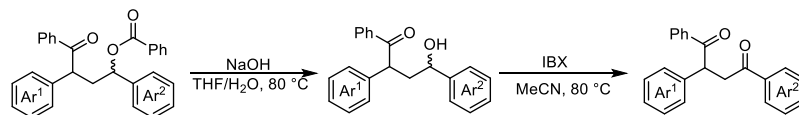

Major regioisomer of **3ae-s**

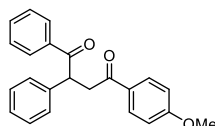

### 4-(4-Methoxyphenyl)-1,2-diphenylbutane-1,4-dione

$^1\text{H}$  NMR (300 MHz,  $\text{CDCl}_3$ ):  $\delta$  8.11 – 8.00 (m, 4H), 7.55 – 7.34 (m, 8H), 7.01 – 6.90 (m, 2H), 5.38 – 5.33 (m, 1H), 4.30 – 4.18 (m, 1H), 3.90 (s, 3H), 3.35 – 3.26 (m, 1H).

Major regioisomer of **3af-s**

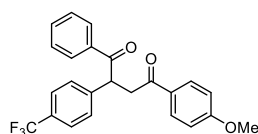

### 4-(4-Methoxyphenyl)-1-phenyl-2-(4-(trifluoromethyl)phenyl)butane-1,4-dione

$^1\text{H}$  NMR (300 MHz,  $\text{CDCl}_3$ ):  $\delta$  7.97 (ddt,  $J = 16.5, 6.9, 2.0$  Hz, 4H), 7.54 – 7.36 (m, 7H), 6.91 (dd,  $J = 9.1, 2.4$  Hz, 2H), 5.39 (dd,  $J = 9.8, 4.0$  Hz, 1H), 4.18 – 4.06 (m, 1H), 3.85 (s, 3H), 3.31 – 3.23 (m, 1H).

Major regioisomer of **3ag-s**

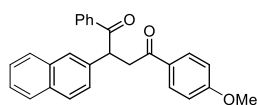

### 4-(4-methoxyphenyl)-2-(naphthalen-2-yl)-1-phenylbutane-1,4-dione

$^1\text{H}$  NMR (300 MHz,  $\text{CDCl}_3$ ):  $\delta$  8.04 – 7.98 (m, 2H), 7.92 – 7.89 (m, 2H), 7.72 (d,  $J = 5.3$  Hz, 3H), 7.44 – 7.30 (m, 7H), 6.85 (d,  $J = 8.9$  Hz, 2H), 5.41 (dd,  $J = 10.0, 3.7$  Hz, 1H), 4.19 (dd,  $J = 17.9, 10.1$  Hz, 1H), 3.79 (s, 3H), 3.28 (dd,  $J = 17.9, 3.8$  Hz, 1H).

## D. Large-scale preparation of **3a** and its derivatization:

### (a) Large-scale preparation of **3a**

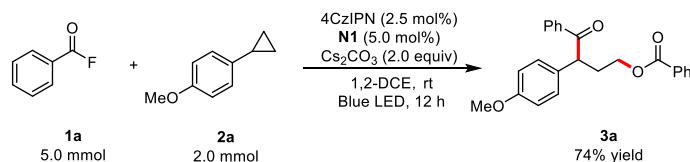

To an oven-dried 50 mL Schlenk tube equipped with a stir bar, acyl fluoride **1a** (620 mg, 5.0 mmol, 2.5 equiv.), aryl cyclopropane **2a** (370.5 mg, 2.0 mmol, 1.0 equiv.), photocatalyst 4CzIPN (39.5 mg, 2.5 mol%), **N1** (31.0 mg, 5.0 mol%) and  $\text{Cs}_2\text{CO}_3$  (1.3 g, 2.0 equiv.) were added. Then, the reaction tube was evacuated and backfilled with argon for two times. Subsequently, anhydrous DCE (10.0 mL, 0.2 M) was added. The resulting mixture was irradiated with blue LED at room temperature for 12 h. The residue was purified by silica gel chromatography to afford the desired product **3a** (554 mg, 74% yield).

### (b) Deprotection of **3a**

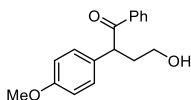

### 4-Hydroxy-2-(4-methoxyphenyl)-1-phenylbutan-1-one (**4a**)

The NaOH aq (1 mL, 1 M) solution was added to a solution of **3a** (37.4 mg, 0.10 mmol) in THF (1.0 mL). The reaction mixture was stirred at 80 °C for 6 h. After completion, the mixture was extracted with ethyl acetate (3 × 3 mL). The organic layer was dried by  $\text{Na}_2\text{SO}_4$ , after filtration and evaporated under reduced pressure. Then, the residue was purified by column chromatography on silica gel (pentane/ethyl acetate = 6:1) to afford the desired product **4a** as colorless oil (20.5 mg, 76% yield).

$^1\text{H NMR}$  (300 MHz,  $\text{CDCl}_3$ ):  $\delta$  7.94 – 7.86 (m, 2H), 7.45 – 7.35 (m, 1H), 7.31 (dd,  $J = 8.3, 6.6$  Hz, 2H), 7.18 – 7.09 (m, 2H), 6.83 – 6.68 (m, 2H), 4.74 (t,  $J = 7.2$  Hz, 1H), 3.68 (s, 3H), 3.64 – 3.45 (m, 2H), 2.33 (ddd,  $J = 14.5, 7.2, 5.2$  Hz, 1H), 1.99 (tdd,  $J = 7.4, 6.1, 4.9$  Hz, 1H).

$^{13}\text{C NMR}$  (76 MHz,  $\text{CDCl}_3$ ):  $\delta$  200.3, 158.7, 136.7, 132.9, 131.0, 129.4, 128.8, 128.5, 114.5, 60.5, 55.2, 49.1, 36.4.

FTIR (neat):  $\nu$  ( $\text{cm}^{-1}$ ) 2957, 2930, 1710, 1512, 1248, 1178.

HRMS (ESI-TOF)  $m/z$ :  $[\text{M}+\text{Na}^+]$  Calcd for  $\text{C}_{17}\text{H}_{18}\text{NaO}_3$  293.1154, found: 293.1148.

### (c) Reduction of **3a**

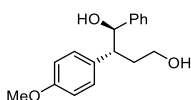

### 2-(4-Methoxyphenyl)-1-phenylbutane-1,4-diol (**4b**)

A solution of LiAlH<sub>4</sub> (19.0 mg, 0.50 mmol, 5.0 equiv.) in dry THF (3 mL) was stirred at 0 °C under N<sub>2</sub> atmosphere. Then, a solution of **3a** (37.4 mg, 0.10 mmol, 1.0 equiv.) in dry THF (2 mL) was added slowly. The reaction mixture was stirred at room temperature for 3 h and quenched with aqueous NaOH (2 mL, 2.5 M) solution. The mixture was extracted with ethyl acetate (3 × 3 mL). The organic layer was dried by Na<sub>2</sub>SO<sub>4</sub>, after filtration and evaporated under reduced pressure. The diastereoselectivity was determined by <sup>1</sup>H NMR on the crude product (>19:1 dr). Then, the residue was purified by column chromatography on silica gel (pentane/ethyl acetate = 2:1) to afford the desired product **4b** as colorless oil (26.4 mg, 97% yield). The relative configuration was confirmed by comparison with a related known compound.<sup>[8]</sup>

<sup>1</sup>H NMR (500 MHz, CDCl<sub>3</sub>): δ 7.38 – 7.24 (m, 5H), 7.20 – 7.12 (m, 2H), 6.92 – 6.86 (m, 2H), 4.72 (d, *J* = 8.1 Hz, 1H), 3.82 (s, 3H), 3.43 (ddd, *J* = 11.7, 6.9, 5.0 Hz, 1H), 3.32 (ddd, *J* = 10.6, 8.0, 6.3 Hz, 1H), 3.00 (ddd, *J* = 12.4, 8.1, 4.5 Hz, 1H), 1.81 – 1.62 (m, 2H).

<sup>13</sup>C NMR (76 MHz, CDCl<sub>3</sub>): δ 158.7, 142.4, 132.4, 129.7, 128.3, 127.8, 127.0, 114.2, 78.7, 60.9, 55.3, 49.9, 34.9.

FTIR (neat): ν (cm<sup>-1</sup>) 3057, 1512, 1420, 1265, 702.

HRMS (ESI-TOF) *m/z* [M+Na<sup>+</sup>] Calcd for C<sub>17</sub>H<sub>20</sub>NaO<sub>3</sub> 295.1310, found: 295.1302.

### (c) Acid-catalyzed cyclization of **4b**

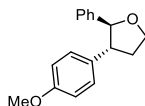

### 3-(4-Methoxyphenyl)-2-phenyltetrahydrofuran (**4c**)

To a stirred solution of diol **4b** (27.2 mg, 0.10 mmol) in 1.0 mL dry 1,2-dichloroethane in a 5.0 mL reaction tube, TfOH (10.0 mol%) was added under inert atmosphere. The reaction vial was capped and put into an oil bath pre heated at 40 °C for overnight. After completion, the mixture was concentrated under reduced pressure and a column chromatographic purification was performed using silica gel (pentane/ethyl acetate = 50:1) to afford the desired product **4c** as colorless oil (22.6 mg, 89% yield). The relative configuration was confirmed by comparison with a related known compound.<sup>[9-10]</sup>

<sup>1</sup>H NMR (300 MHz, CDCl<sub>3</sub>): δ 7.21 – 7.06 (m, 5H), 7.06 – 6.94 (m, 2H), 6.83 – 6.73 (m, 2H), 4.70 (d, *J* = 8.5 Hz, 1H), 4.17 (dd, *J* = 8.3, 5.8 Hz, 2H), 3.72 (s, 3H), 3.09 (dt, *J* = 9.6, 8.2 Hz, 1H), 2.42 – 2.30 (m, 1H), 2.23 – 2.10 (m, 1H).

$^{13}\text{C}$  NMR (76 MHz,  $\text{CDCl}_3$ ):  $\delta$  158.4, 141.8, 132.7, 128.7, 128.2, 127.4, 125.8, 113.9, 87.7, 68.5, 55.3, 53.5, 35.6.

FTIR (neat):  $\nu$  ( $\text{cm}^{-1}$ ) 2968, 1582, 1514, 1339, 1215, 701.

HRMS (ESI-TOF)  $m/z$ :  $[\text{M}+\text{Na}^+]$  Calcd for  $\text{C}_{17}\text{H}_{18}\text{NaO}_2$  277.1204, found: 277.1196.

### E. Mechanistic studies:

#### (a) Radical trapping experiment:

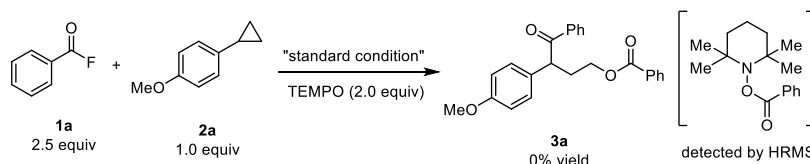

To an oven-dried 10 mL Schlenk tube equipped with a stir bar, acyl fluoride **1a** (62.1 mg, 0.50 mmol, 2.5 equiv), aryl cyclopropane **2a** (29.6 mg, 0.20 mmol, 1.0 equiv.), photocatalyst 4CzIPN (7.9 mg, 5.0 mol%), **N1** (6.2 mg, 10.0 mol%),  $\text{Cs}_2\text{CO}_3$  (130.4 mg, 2.0 equiv.) and (2,2,6,6-tetramethylpiperidin-1-yl)oxyl (TEMPO) (62.5 mg, 2.0 equiv.) were added. Then, the reaction tube was evacuated and backfilled with argon for two times. Subsequently, anhydrous DCE (2.0 mL, 0.1 M) was added. The resulting mixture was irradiated with blue LED at room temperature for 12 h. The mixture was analyzed by HRMS (see below).

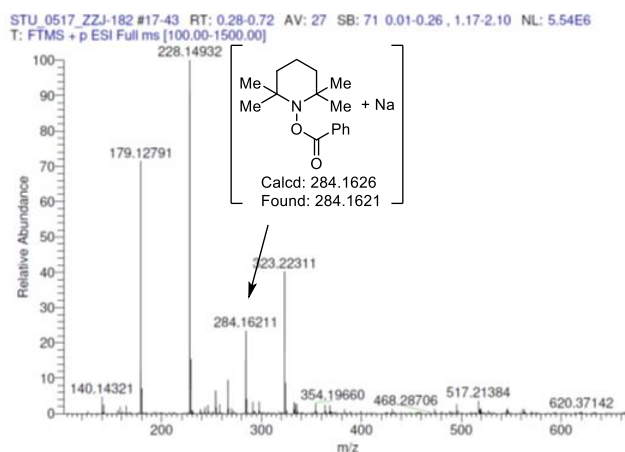

#### (b) The acyl azolium salt **5** as and Na-benzoate as competent substrates:

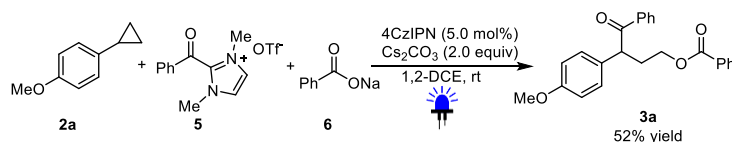

To an oven-dried 10 mL Schlenk tube equipped with a stir bar, aryl cyclopropane **2a** (29.6 mg, 0.20 mmol, 1.0 equiv.), acylazolium ion **5** (40.3 mg, 0.20 mmol, 1.0 equiv.), sodium benzoate **6** (28.8 mg, 0.20 mmol, 1.0 equiv.), photocatalyst 4CzIPN (7.9 mg, 5.0 mol%) and  $\text{Cs}_2\text{CO}_3$  (130.4 mg, 2.0 equiv.)



were added. Then, the reaction tube was evacuated and backfilled with argon for two times. Subsequently, anhydrous DCE (2.0 mL, 0.1 M) was added. The resulting mixture was irradiated with blue LEDs at room temperature for 12 h. The residue was purified by silica gel chromatography to afford the desired product **3a** in 52% yield.

**(c) The benzyl anion trapping experiment by acetone:**

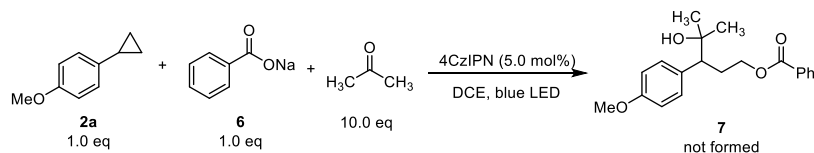

To an oven-dried 10 mL Schlenk tube equipped with a stir bar, aryl cyclopropane **2a** (29.6 mg, 0.20 mmol, 1.0 equiv.), sodium benzoate **6** (28.8 mg, 0.20 mmol, 1.0 equiv.), dry acetone (116 mg, 2.0 mmol, 10.0 equiv.) and photocatalyst 4CzIPN (7.9 mg, 5.0 mol%) were added. Then, the reaction tube was evacuated and backfilled with argon for two times. Subsequently, anhydrous DCE (2.0 mL, 0.1 M) was added. The resulting mixture was irradiated with blue LEDs at room temperature for 12 h. The alcohol **7** was not formed by HRMS measurement.

**(d) Experiments with enantiomerically enriched 2s:**

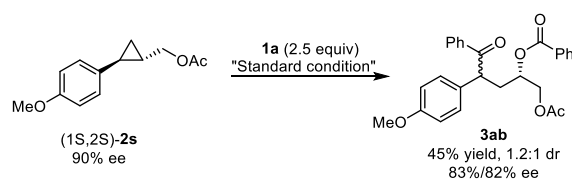

The reaction of **(1S,2S)-2s** with 90% ee was performed with general procedure D and purified by flash silica column chromatography (pentane/ethyl acetate = 10:1) to afford the product **3ab** in 45% yield with 83%/82% ee and 1.2:1 dr. HPLC Analysis: Chiralpak IC (Cyclohexane/iPrOH = 93/7, 1.0 mL/min, 25 °C).

Racemic sample:

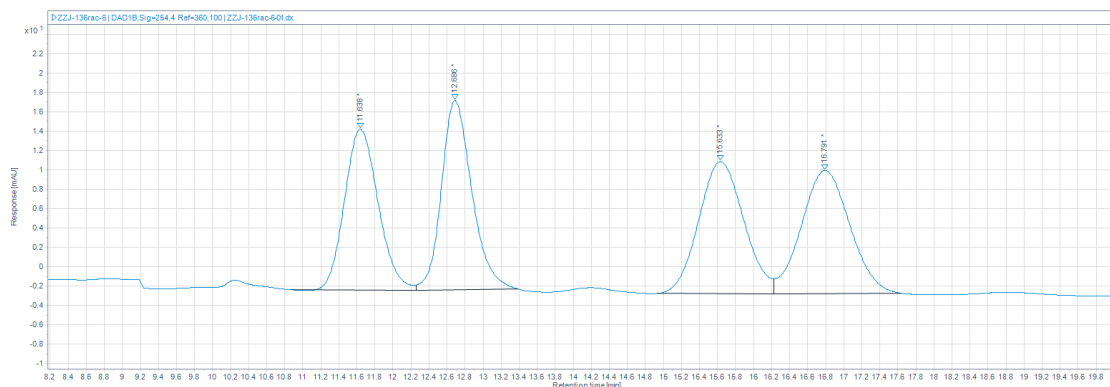

#### Injection Results

| Peak # | Signal description          | RT (min) | Area    | Area%  | Height |
|--------|-----------------------------|----------|---------|--------|--------|
| 1      | DAD18,Sig=254.4 Ref=360,100 | 11.638   | 431.266 | 23.432 | 16.611 |
| 2      | DAD18,Sig=254.4 Ref=360,100 | 12.686   | 459.182 | 24.949 | 19.533 |
| 3      | DAD18,Sig=254.4 Ref=360,100 | 15.633   | 474.442 | 25.778 | 18.628 |
| 4      | DAD18,Sig=254.4 Ref=360,100 | 16.791   | 475.602 | 25.841 | 12.721 |

Chiral sample:

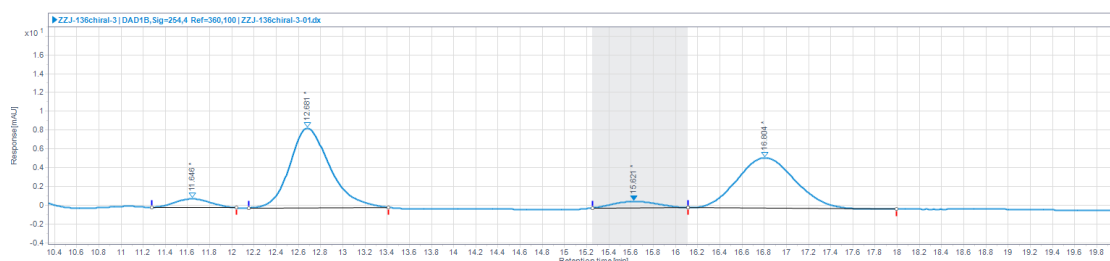

#### Injection Results

| Peak # | Signal description          | RT (min) | Area    | Area%  | Height |
|--------|-----------------------------|----------|---------|--------|--------|
| 1      | DAD18,Sig=254.4 Ref=360,100 | 11.646   | 20.541  | 4.582  | 0.925  |
| 2      | DAD18,Sig=254.4 Ref=360,100 | 12.681   | 213.369 | 47.601 | 8.467  |
| 3      | DAD18,Sig=254.4 Ref=360,100 | 15.621   | 18.735  | 4.180  | 0.679  |
| 4      | DAD18,Sig=254.4 Ref=360,100 | 16.804   | 195.601 | 43.637 | 5.374  |

#### (e) Experiments with enantiomerically enriched **2l**:

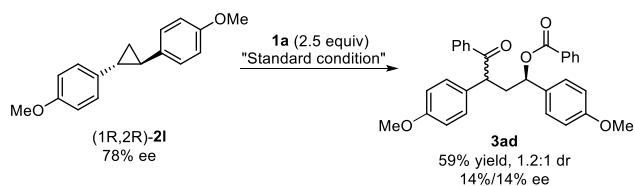

The reaction of **(1R,2R)-2l** with 78% ee was performed with general procedure D and purified by flash silica column chromatography (pentane/ethyl acetate = 10:1) to afford the product **3ad** in 59% yield with 14%/14% ee and 1.2:1 dr. HPLC Analysis: Chiralpak AD-H (Cyclohexane/iPrOH = 90/10, 1.0 mL/min, 25 °C).

Racemic sample:

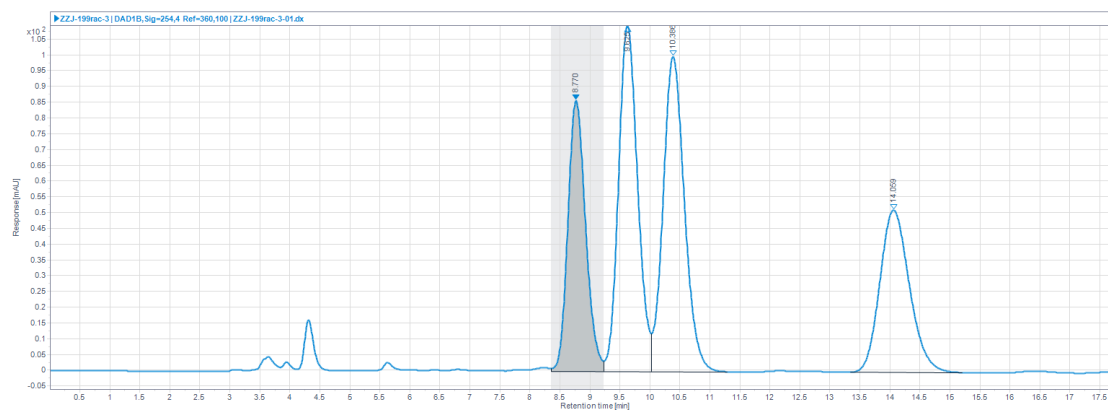

#### Injection Results

| Peaks | Summary                     |          |          |        |         |
|-------|-----------------------------|----------|----------|--------|---------|
| #     | Signal description          | RT (min) | Area     | Area%  | Height  |
| 1     | DAD18,Sig=254,4 Ref=360,100 | 8.770    | 1760.800 | 20.868 | 85.787  |
| 2     | DAD18,Sig=254,4 Ref=360,100 | 9.625    | 2434.452 | 28.852 | 109.788 |
| 3     | DAD18,Sig=254,4 Ref=360,100 | 10.386   | 2475.032 | 29.333 | 99.868  |
| 4     | DAD18,Sig=254,4 Ref=360,100 | 14.059   | 1767.530 | 20.948 | 51.510  |

Chiral sample:

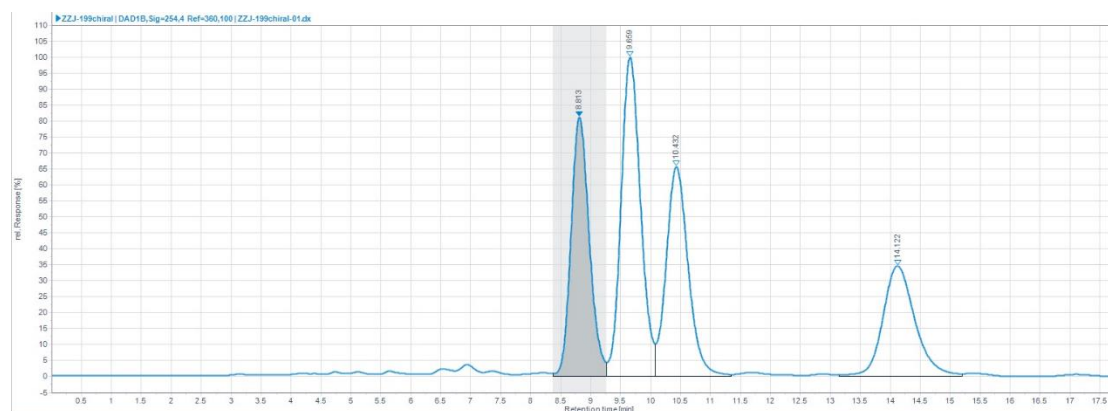

#### Injection Results

| Peaks | Summary                     |          |          |        |         |
|-------|-----------------------------|----------|----------|--------|---------|
| #     | Signal description          | RT (min) | Area     | Area%  | Height  |
| 1     | DAD18,Sig=254,4 Ref=360,100 | 8.813    | 4569.813 | 24.727 | 236.154 |
| 2     | DAD18,Sig=254,4 Ref=360,100 | 9.659    | 6012.796 | 32.535 | 266.637 |
| 3     | DAD18,Sig=254,4 Ref=360,100 | 10.432   | 4464.945 | 24.160 | 174.910 |
| 4     | DAD18,Sig=254,4 Ref=360,100 | 14.122   | 3433.502 | 18.578 | 92.384  |

To our hypothesis of the erosion of stereochemistry due to the rapid ring opening/closing process of the diaryl radical cation, we treated the enantiomerically enriched **2s** and **2l** with blue LED irradiation (see below). After one hour, the ee of **2s** would be retained but the diaryl cyclopropane **2l** would be racemization totally. These experimental results could support our assumption.

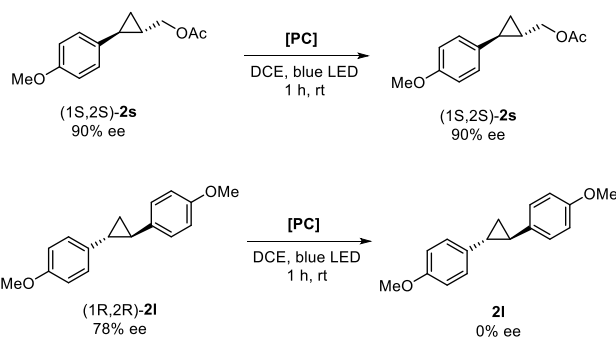

#### (f) Luminescence quenching experiments

Emission intensities were recorded using a Jasco FP-8300 spectrofluorometer. 4-CzIPN solutions were excited at 435 nm and the emission intensity was recorded at 590 nm. In a typical experiment, to a certain amount of a solution of 4-CzIPN in DCE (5 mL), the appropriate amount of quencher (1-cyclopropyl-4-methoxybenzene **2a**, acylazolium ion **5**) was added in a screw-top quartz cuvette, and the emission of the sample was recorded.

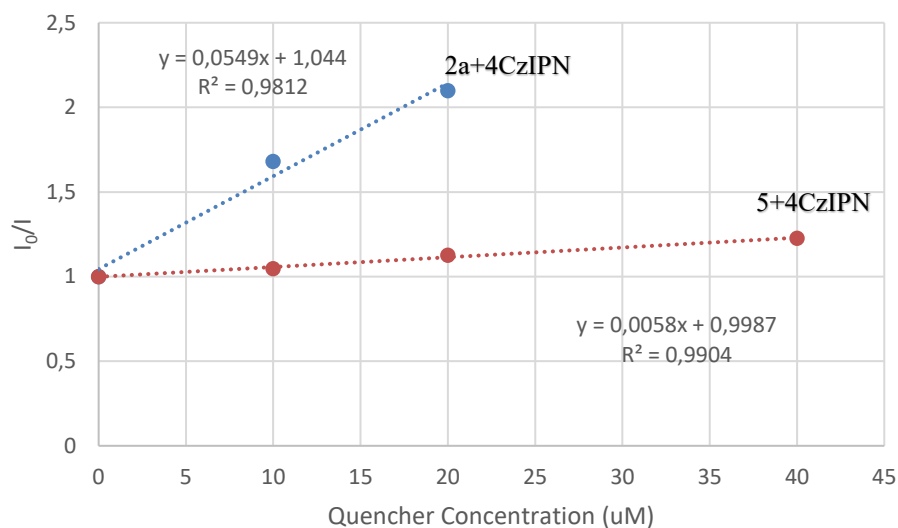

#### F. X-ray data for **3s**:

**X-Ray diffraction:** Data sets for compound **3s** were collected with a Bruker APEXII Kappa CCD diffractometer. Programs used: data collection: APEX3 V2019.1-0<sup>1</sup> (Bruker AXS Inc., 2019); cell refinement: SAINT V8.40A (Bruker AXS Inc., 2019); data reduction: SAINT V8.40A (Bruker AXS Inc., 2019); absorption correction, SADABS V2016/2 (Bruker AXS Inc., 2019); structure solution *SHELXT-2015*<sup>2</sup> (Sheldrick, G. M. *Acta Cryst.*, 2015, *A71*, 3-8); structure refinement *SHELXL-2015*<sup>3</sup> (Sheldrick, G. M. *Acta Cryst.*, 2015, *C71* (1), 3-8) and graphics, *XP*<sup>4</sup> (Version 5.1, Bruker AXS Inc., Madison, Wisconsin, USA, 1998). *R*-values are given for observed reflections, and *wR*<sup>2</sup> values are given for all reflections.

**X-ray crystal structure analysis of **3s**:** A colorless plate-like specimen of C<sub>26</sub>H<sub>24</sub>O<sub>3</sub>, approximate dimensions 0.050 mm x 0.140 mm x 0.140 mm, was used for the X-ray crystallographic analysis. The X-ray intensity data were measured on a Kappa CCD APEXII Bruker APEXII Diffractometer system equipped with a fine-focus sealed tube Cu sealed tube (CuK $\alpha$ ,  $\lambda$  = 1.54178 Å) and a graphite monochromator. A total of 1558 frames were collected. The total exposure time was 21.01 hours. The

frames were integrated with the Bruker SAINT software package using a wide-frame algorithm. The integration of the data using a triclinic unit cell yielded a total of 12124 reflections to a maximum  $\theta$  angle of  $66.68^\circ$  ( $0.84 \text{ \AA}$  resolution), of which 3457 were independent (average redundancy 3.507, completeness = 99.2%,  $R_{\text{int}} = 4.24\%$ ,  $R_{\text{sig}} = 3.80\%$ ) and 2728 (78.91%) were greater than  $2\sigma(F^2)$ . The final cell constants of  $a = 5.7053(2) \text{ \AA}$ ,  $b = 9.3059(4) \text{ \AA}$ ,  $c = 19.1323(7) \text{ \AA}$ ,  $\alpha = 89.576(2)^\circ$ ,  $\beta = 89.233(2)^\circ$ ,  $\gamma = 75.384(2)^\circ$ , volume =  $982.82(7) \text{ \AA}^3$ , are based upon the refinement of the XYZ-centroids of 2945 reflections above  $20 \sigma(I)$  with  $9.245^\circ < 2\theta < 132.9^\circ$ . Data were corrected for absorption effects using the Multi-Scan method (SADABS). The ratio of minimum to maximum apparent transmission was 0.906. The calculated minimum and maximum transmission coefficients (based on crystal size) are 0.9130 and 0.9680. The structure was solved and refined using the Bruker SHELXTL Software Package, using the space group  $P-1$ , with  $Z = 2$  for the formula unit,  $\text{C}_{26}\text{H}_{24}\text{O}_3$ . The final anisotropic full-matrix least-squares refinement on  $F^2$  with 281 variables converged at  $R1 = 3.97\%$ , for the observed data and  $wR2 = 10.31\%$  for all data. The goodness-of-fit was 1.051. The largest peak in the final difference electron density synthesis was  $0.170 \text{ e}/\text{\AA}^3$  and the largest hole was  $-0.255 \text{ e}/\text{\AA}^3$  with an RMS deviation of  $0.044 \text{ e}/\text{\AA}^3$ . On the basis of the final model, the calculated density was  $1.299 \text{ g}/\text{cm}^3$  and  $F(000)$ , 408  $e^-$ . CCDC Nr.: 2094400.

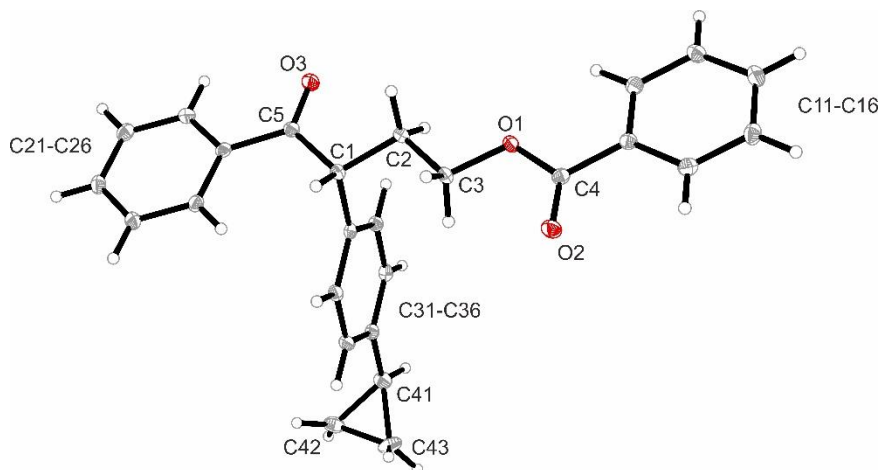

**Figure 1:** Crystal structure of compound **3s**. Thermal ellipsoids are shown at 30% probability.

**Table 1.** Sample and crystal data for **3s**.

| Identification code | <b>3s</b> |
|---------------------|-----------|
|---------------------|-----------|

|                               |                                                |                |
|-------------------------------|------------------------------------------------|----------------|
| <b>Chemical formula</b>       | C <sub>26</sub> H <sub>24</sub> O <sub>3</sub> |                |
| <b>Formula weight</b>         | 384.45 g/mol                                   |                |
| <b>Temperature</b>            | 103(2) K                                       |                |
| <b>Wavelength</b>             | 1.54178 Å                                      |                |
| <b>Crystal size</b>           | 0.050 x 0.140 x 0.140 mm                       |                |
| <b>Crystal habit</b>          | colorless plate                                |                |
| <b>Crystal system</b>         | triclinic                                      |                |
| <b>Space group</b>            | P -1                                           |                |
| <b>Unit cell dimensions</b>   | a = 5.7053(2) Å                                | α = 89.576(2)° |
|                               | b = 9.3059(4) Å                                | β = 89.233(2)° |
|                               | c = 19.1323(7) Å                               | γ = 75.384(2)° |
| <b>Volume</b>                 | 982.82(7) Å <sup>3</sup>                       |                |
| <b>Z</b>                      | 2                                              |                |
| <b>Density (calculated)</b>   | 1.299 g/cm <sup>3</sup>                        |                |
| <b>Absorption coefficient</b> | 0.664 mm <sup>-1</sup>                         |                |
| <b>F(000)</b>                 | 408                                            |                |

**Table 2. Data collection and structure refinement for 3s.**

|                                            |                                                             |
|--------------------------------------------|-------------------------------------------------------------|
| <b>Diffractometer</b>                      | Kappa CCD APEXII Bruker APEXII Diffractometer               |
| <b>Radiation source</b>                    | fine-focus sealed tube Cu sealed tube (CuKα, λ = 1.54178 Å) |
| <b>Theta range for data collection</b>     | 4.62 to 66.68°                                              |
| <b>Index ranges</b>                        | -6 ≤ h ≤ 6, -11 ≤ k ≤ 11, -22 ≤ l ≤ 22                      |
| <b>Reflections collected</b>               | 12124                                                       |
| <b>Independent reflections</b>             | 3457 [R(int) = 0.0424]                                      |
| <b>Coverage of independent reflections</b> | 99.2%                                                       |

|                                            |                                                                                  |                           |
|--------------------------------------------|----------------------------------------------------------------------------------|---------------------------|
| <b>Absorption correction</b>               | Multi-Scan                                                                       |                           |
| <b>Max. and min. transmission</b>          | 0.9680 and 0.9130                                                                |                           |
| <b>Structure solution technique</b>        | direct methods                                                                   |                           |
| <b>Structure solution program</b>          | SHELXT 2018/2 (Sheldrick, 2018)                                                  |                           |
| <b>Refinement method</b>                   | Full-matrix least-squares on $F^2$                                               |                           |
| <b>Refinement program</b>                  | SHELXL-2018/3 (Sheldrick, 2018)                                                  |                           |
| <b>Function minimized</b>                  | $\Sigma w(F_o^2 - F_c^2)^2$                                                      |                           |
| <b>Data / restraints / parameters</b>      | 3457 / 49 / 281                                                                  |                           |
| <b>Goodness-of-fit on <math>F^2</math></b> | 1.051                                                                            |                           |
| <b>Final R indices</b>                     | 2728 data; $I > 2\sigma(I)$                                                      | R1 = 0.0397, wR2 = 0.0964 |
|                                            | all data                                                                         | R1 = 0.0528, wR2 = 0.1031 |
| <b>Weighting scheme</b>                    | $w = 1/[\sigma^2(F_o^2) + (0.0531P)^2 + 0.1073P]$ where $P = (F_o^2 + 2F_c^2)/3$ |                           |
| <b>Largest diff. peak and hole</b>         | 0.170 and -0.255 $e\text{\AA}^{-3}$                                              |                           |
| <b>R.M.S. deviation from mean</b>          | 0.044 $e\text{\AA}^{-3}$                                                         |                           |

**Table 3. Bond lengths ( $\text{\AA}$ ) for 3s.**

|         |            |         |            |
|---------|------------|---------|------------|
| C1-C31  | 1.528(2)   | C1-C5   | 1.530(2)   |
| C1-C2   | 1.5372(19) | C1-H1   | 1.0        |
| C2-C3   | 1.514(2)   | C2-H2A  | 0.99       |
| C2-H2B  | 0.99       | C3-O1   | 1.4470(17) |
| C3-H3A  | 0.99       | C3-H3B  | 0.99       |
| C4-O2   | 1.2069(18) | C4-O1   | 1.3448(19) |
| C4-C11  | 1.490(2)   | C5-O3   | 1.2187(18) |
| C5-C21  | 1.502(2)   | C11-C12 | 1.388(2)   |
| C11-C16 | 1.393(2)   | C12-C13 | 1.388(2)   |
| C12-H12 | 0.95       | C13-C14 | 1.386(2)   |
| C13-H13 | 0.95       | C14-C15 | 1.389(2)   |

|           |           |           |           |
|-----------|-----------|-----------|-----------|
| C14-H14   | 0.95      | C15-C16   | 1.386(2)  |
| C15-H15   | 0.95      | C16-H16   | 0.95      |
| C21-C22   | 1.394(2)  | C21-C26   | 1.396(2)  |
| C22-C23   | 1.386(2)  | C22-H22   | 0.95      |
| C23-C24   | 1.388(2)  | C23-H23   | 0.95      |
| C24-C25   | 1.388(2)  | C24-H24   | 0.95      |
| C25-C26   | 1.385(2)  | C25-H25   | 0.95      |
| C26-H26   | 0.95      | C31-C36   | 1.392(2)  |
| C31-C32   | 1.393(2)  | C32-C33   | 1.386(2)  |
| C32-H32   | 0.95      | C33-C34   | 1.397(2)  |
| C33-H33   | 0.95      | C34-C35   | 1.397(2)  |
| C34-C41   | 1.486(2)  | C35-C36   | 1.387(2)  |
| C35-H35   | 0.95      | C36-H36   | 0.95      |
| C41-C42A  | 1.497(10) | C41-C43   | 1.506(5)  |
| C41-C42   | 1.516(5)  | C41-C43A  | 1.528(11) |
| C41-H41   | 1.0       | C41-H41A  | 1.0       |
| C42-C43   | 1.490(6)  | C42-H42A  | 0.99      |
| C42-H42B  | 0.99      | C43-H43A  | 0.99      |
| C43-H43B  | 0.99      | C42A-C43A | 1.471(11) |
| C42A-H42C | 0.99      | C42A-H42D | 0.99      |
| C43A-H43C | 0.99      | C43A-H43D | 0.99      |

---



**Table 4. Bond angles (°) for 3s.**

|             |            |             |            |
|-------------|------------|-------------|------------|
| C31-C1-C5   | 107.88(12) | C31-C1-C2   | 111.92(12) |
| C5-C1-C2    | 111.15(12) | C31-C1-H1   | 108.6      |
| C5-C1-H1    | 108.6      | C2-C1-H1    | 108.6      |
| C3-C2-C1    | 110.13(12) | C3-C2-H2A   | 109.6      |
| C1-C2-H2A   | 109.6      | C3-C2-H2B   | 109.6      |
| C1-C2-H2B   | 109.6      | H2A-C2-H2B  | 108.1      |
| O1-C3-C2    | 107.52(11) | O1-C3-H3A   | 110.2      |
| C2-C3-H3A   | 110.2      | O1-C3-H3B   | 110.2      |
| C2-C3-H3B   | 110.2      | H3A-C3-H3B  | 108.5      |
| O2-C4-O1    | 123.26(13) | O2-C4-C11   | 124.78(14) |
| O1-C4-C11   | 111.96(12) | O3-C5-C21   | 120.53(14) |
| O3-C5-C1    | 120.70(13) | C21-C5-C1   | 118.68(12) |
| C4-O1-C3    | 115.39(11) | C12-C11-C16 | 119.63(14) |
| C12-C11-C4  | 121.88(14) | C16-C11-C4  | 118.49(13) |
| C11-C12-C13 | 120.08(15) | C11-C12-H12 | 120.0      |
| C13-C12-H12 | 120.0      | C14-C13-C12 | 120.31(15) |
| C14-C13-H13 | 119.8      | C12-C13-H13 | 119.8      |
| C13-C14-C15 | 119.64(14) | C13-C14-H14 | 120.2      |
| C15-C14-H14 | 120.2      | C16-C15-C14 | 120.23(15) |
| C16-C15-H15 | 119.9      | C14-C15-H15 | 119.9      |
| C15-C16-C11 | 120.09(14) | C15-C16-H16 | 120.0      |
| C11-C16-H16 | 120.0      | C22-C21-C26 | 118.77(14) |
| C22-C21-C5  | 118.00(13) | C26-C21-C5  | 123.23(14) |
| C23-C22-C21 | 120.96(14) | C23-C22-H22 | 119.5      |
| C21-C22-H22 | 119.5      | C22-C23-C24 | 119.62(15) |
| C22-C23-H23 | 120.2      | C24-C23-H23 | 120.2      |

|                |            |               |            |
|----------------|------------|---------------|------------|
| C25-C24-C23    | 120.07(14) | C25-C24-H24   | 120.0      |
| C23-C24-H24    | 120.0      | C26-C25-C24   | 120.17(14) |
| C26-C25-H25    | 119.9      | C24-C25-H25   | 119.9      |
| C25-C26-C21    | 120.40(14) | C25-C26-H26   | 119.8      |
| C21-C26-H26    | 119.8      | C36-C31-C32   | 117.50(14) |
| C36-C31-C1     | 122.18(13) | C32-C31-C1    | 120.32(13) |
| C33-C32-C31    | 121.27(14) | C33-C32-H32   | 119.4      |
| C31-C32-H32    | 119.4      | C32-C33-C34   | 121.33(14) |
| C32-C33-H33    | 119.3      | C34-C33-H33   | 119.3      |
| C35-C34-C33    | 117.33(14) | C35-C34-C41   | 122.67(14) |
| C33-C34-C41    | 120.00(14) | C36-C35-C34   | 121.11(13) |
| C36-C35-H35    | 119.4      | C34-C35-H35   | 119.4      |
| C35-C36-C31    | 121.46(14) | C35-C36-H36   | 119.3      |
| C31-C36-H36    | 119.3      | C34-C41-C42A  | 123.8(5)   |
| C34-C41-C43    | 121.4(3)   | C34-C41-C42   | 118.2(3)   |
| C43-C41-C42    | 59.1(2)    | C34-C41-C43A  | 119.5(6)   |
| C42A-C41-C43A  | 58.2(5)    | C34-C41-H41   | 115.5      |
| C43-C41-H41    | 115.5      | C42-C41-H41   | 115.5      |
| C34-C41-H41A   | 114.6      | C42A-C41-H41A | 114.6      |
| C43A-C41-H41A  | 114.6      | C43-C42-C41   | 60.2(3)    |
| C43-C42-H42A   | 117.8      | C41-C42-H42A  | 117.8      |
| C43-C42-H42B   | 117.8      | C41-C42-H42B  | 117.8      |
| H42A-C42-H42B  | 114.9      | C42-C43-C41   | 60.8(3)    |
| C42-C43-H43A   | 117.7      | C41-C43-H43A  | 117.7      |
| C42-C43-H43B   | 117.7      | C41-C43-H43B  | 117.7      |
| H43A-C43-H43B  | 114.8      | C43A-C42A-C41 | 62.0(6)    |
| C43A-C42A-H42C | 117.6      | C41-C42A-H42C | 117.6      |

|                |       |               |         |
|----------------|-------|---------------|---------|
| C43A-C42A-H42D | 117.6 | C41-C42A-H42D | 117.6   |
| H42C-C42A-H42D | 114.7 | C42A-C43A-C41 | 59.8(5) |
| C42A-C43A-H43C | 117.8 | C41-C43A-H43C | 117.8   |
| C42A-C43A-H43D | 117.8 | C41-C43A-H43D | 117.8   |
| H43C-C43A-H43D | 114.9 |               |         |

**Table 5. Torsion angles (°) for 3s.**

|                 |             |                 |             |
|-----------------|-------------|-----------------|-------------|
| C31-C1-C2-C3    | -68.75(16)  | C5-C1-C2-C3     | 170.56(13)  |
| C1-C2-C3-O1     | 169.26(12)  | C31-C1-C5-O3    | -105.15(16) |
| C2-C1-C5-O3     | 17.9(2)     | C31-C1-C5-C21   | 71.49(16)   |
| C2-C1-C5-C21    | -165.46(12) | O2-C4-O1-C3     | -2.3(2)     |
| C11-C4-O1-C3    | 178.12(12)  | C2-C3-O1-C4     | -176.84(12) |
| O2-C4-C11-C12   | 177.08(15)  | O1-C4-C11-C12   | -3.4(2)     |
| O2-C4-C11-C16   | -3.7(2)     | O1-C4-C11-C16   | 175.90(13)  |
| C16-C11-C12-C13 | -1.6(2)     | C4-C11-C12-C13  | 177.69(14)  |
| C11-C12-C13-C14 | 1.1(2)      | C12-C13-C14-C15 | 0.2(2)      |
| C13-C14-C15-C16 | -1.0(2)     | C14-C15-C16-C11 | 0.5(2)      |
| C12-C11-C16-C15 | 0.8(2)      | C4-C11-C16-C15  | -178.49(14) |
| O3-C5-C21-C22   | 3.9(2)      | C1-C5-C21-C22   | -172.79(13) |
| O3-C5-C21-C26   | -176.41(15) | C1-C5-C21-C26   | 6.9(2)      |
| C26-C21-C22-C23 | -0.3(2)     | C5-C21-C22-C23  | 179.46(14)  |
| C21-C22-C23-C24 | -1.0(2)     | C22-C23-C24-C25 | 1.4(2)      |
| C23-C24-C25-C26 | -0.6(2)     | C24-C25-C26-C21 | -0.7(2)     |
| C22-C21-C26-C25 | 1.1(2)      | C5-C21-C26-C25  | -178.63(14) |
| C5-C1-C31-C36   | -119.40(15) | C2-C1-C31-C36   | 118.03(15)  |
| C5-C1-C31-C32   | 60.20(17)   | C2-C1-C31-C32   | -62.37(18)  |
| C36-C31-C32-C33 | 0.1(2)      | C1-C31-C32-C33  | -179.50(14) |

|                   |             |                   |            |
|-------------------|-------------|-------------------|------------|
| C31-C32-C33-C34   | 0.3(2)      | C32-C33-C34-C35   | -0.6(2)    |
| C32-C33-C34-C41   | 179.47(14)  | C33-C34-C35-C36   | 0.5(2)     |
| C41-C34-C35-C36   | -179.59(15) | C34-C35-C36-C31   | -0.1(2)    |
| C32-C31-C36-C35   | -0.2(2)     | C1-C31-C36-C35    | 179.38(14) |
| C35-C34-C41-C42A  | 27.3(11)    | C33-C34-C41-C42A  | -152.8(11) |
| C35-C34-C41-C43   | -22.0(6)    | C33-C34-C41-C43   | 157.9(5)   |
| C35-C34-C41-C42   | 47.1(4)     | C33-C34-C41-C42   | -133.0(4)  |
| C35-C34-C41-C43A  | -42.3(9)    | C33-C34-C41-C43A  | 137.6(8)   |
| C34-C41-C42-C43   | -111.6(3)   | C34-C41-C43-C42   | 106.3(4)   |
| C34-C41-C42A-C43A | -106.4(9)   | C34-C41-C43A-C42A | 113.6(7)   |

---

#### G. References:

- [1] Z. Wang, X. Wang, Y. Nishihara, *Chem. Commun.* **2018**, 54, 13969.
- [2] D. J. Wallace, C. Chen, *Tetrahedron Lett.* **2002**, 43, 6987.
- [3] S. Francoeur, J. Martel, N. Wilb, A. B. Charette, *Angew. Chem. Int. Ed.* **2020**, 59, 4539.
- [4] M. Sugawara, J. I. Yoshida, *J. Am. Chem. Soc.* **1997**, 119, 11986.
- [5] S. Chanthamath, K. Phomkeona, K. Shibatomi, S. Iwasa, *Chem. Commun.*, **2012**, 48, 7750.
- [6] A. E. Mattson, A. R. Bharadwaj, A. M. Zuhl, K. A. Scheidt, *J. Org. Chem.* **2006**, 71, 5715.
- [7] Z. Liu, X. Zhang, M. Virelli, G. Zanoni, E. A. Anderson, X. Bi, *iScience*, **2018**, 8, 54.
- [8] J. Y. L. Chung, D. Mancheno, P. G. Dormer, N. Variankaval, R. G. Ball, N. N. Tsou, *Org. Lett.* **2008**, 10, 3037.
- [9] P. Fries, M. K. Müller, J. Hartung, *Org. Biomol. Chem.* **2013**, 11, 2630.
- [10] M. C. Whisler, L. Vaillancourt, P. Beak, *Org. Lett.* **2000**, 2, 2655.

H. NMR spectrum:

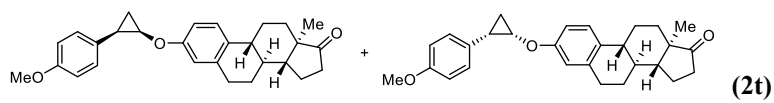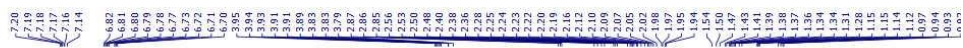

300 MHz in CDCl<sub>3</sub>

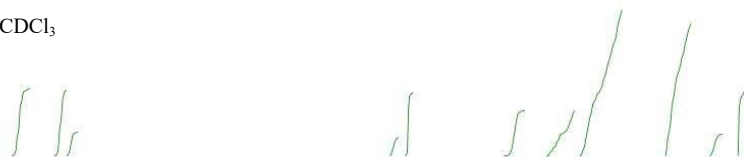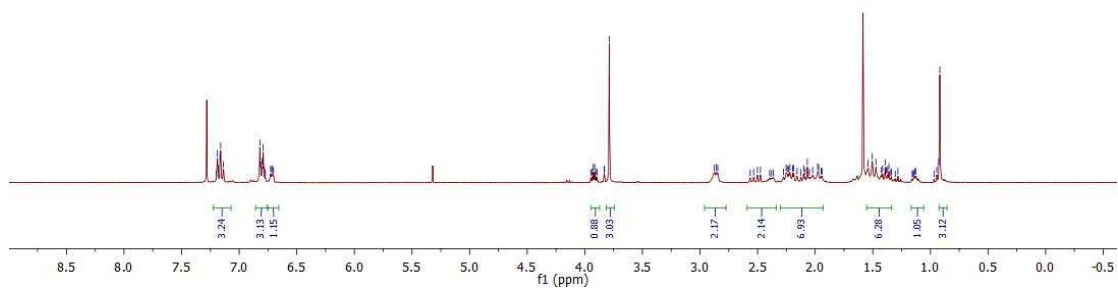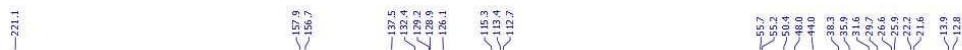

75 MHz in CDCl<sub>3</sub>

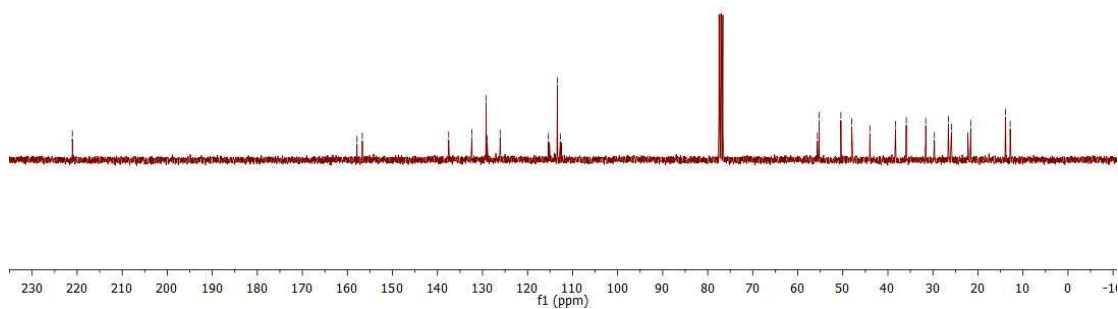

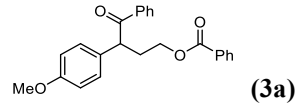

500 MHz in CDCl<sub>3</sub>

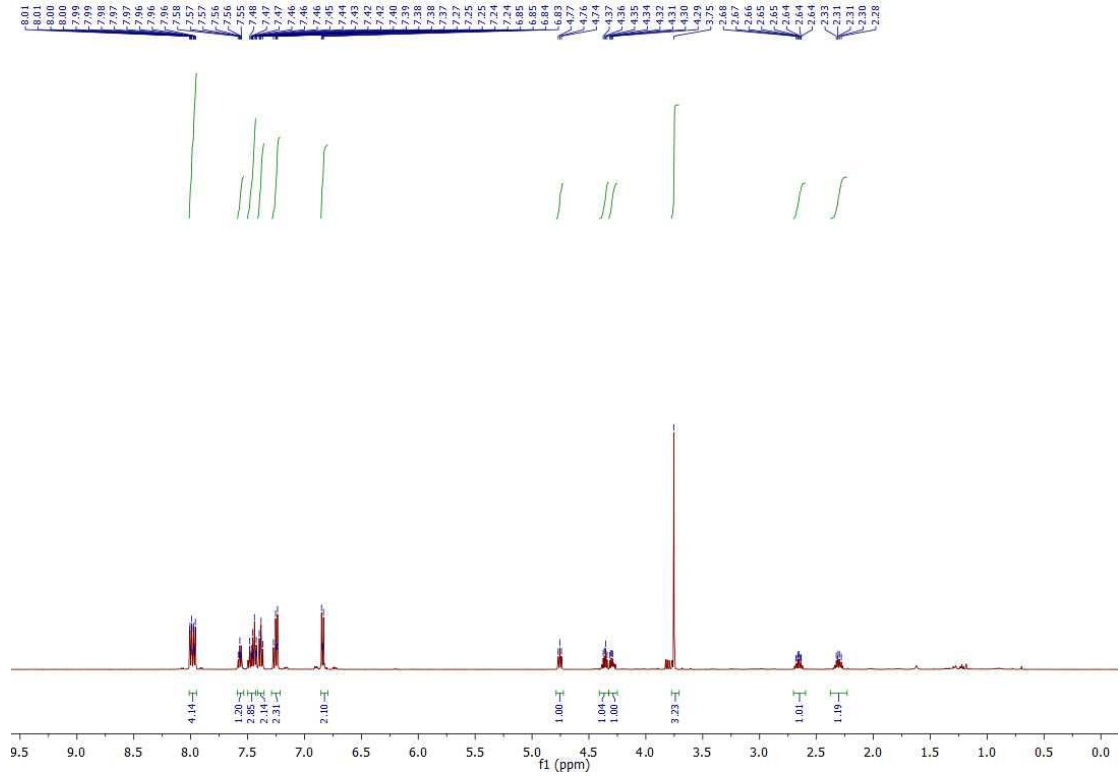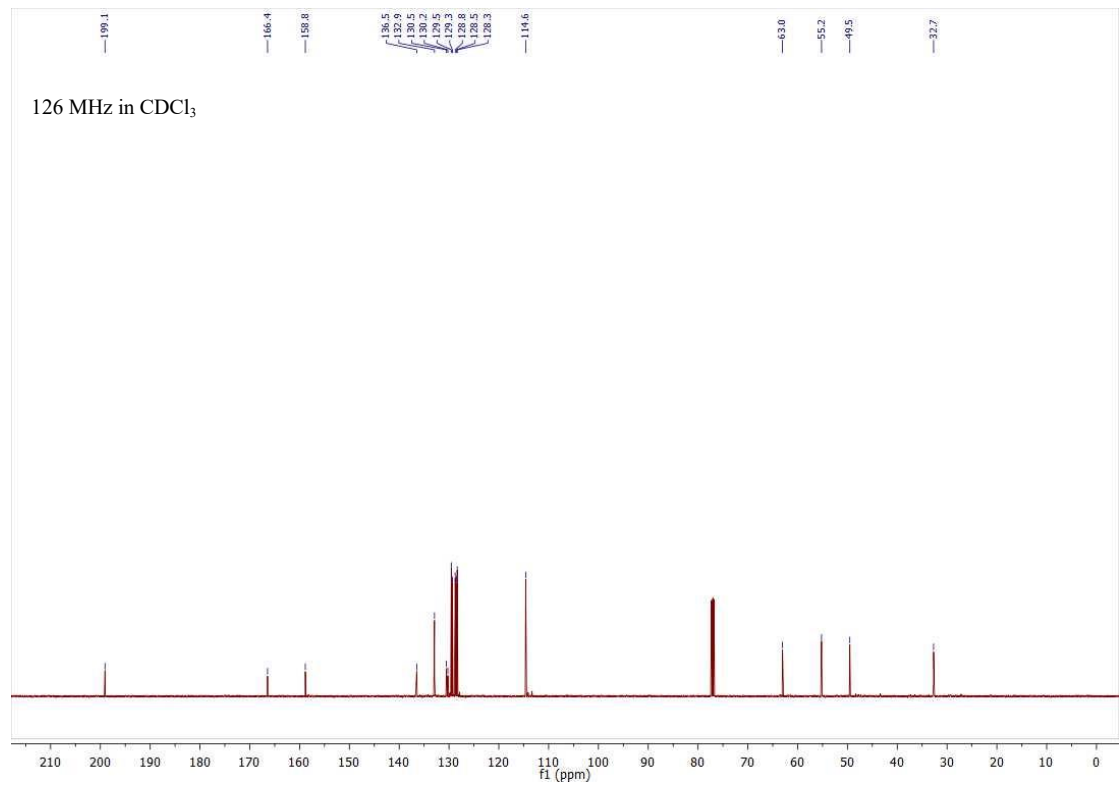

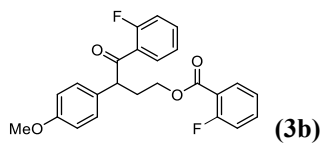

500 MHz in CDCl<sub>3</sub>

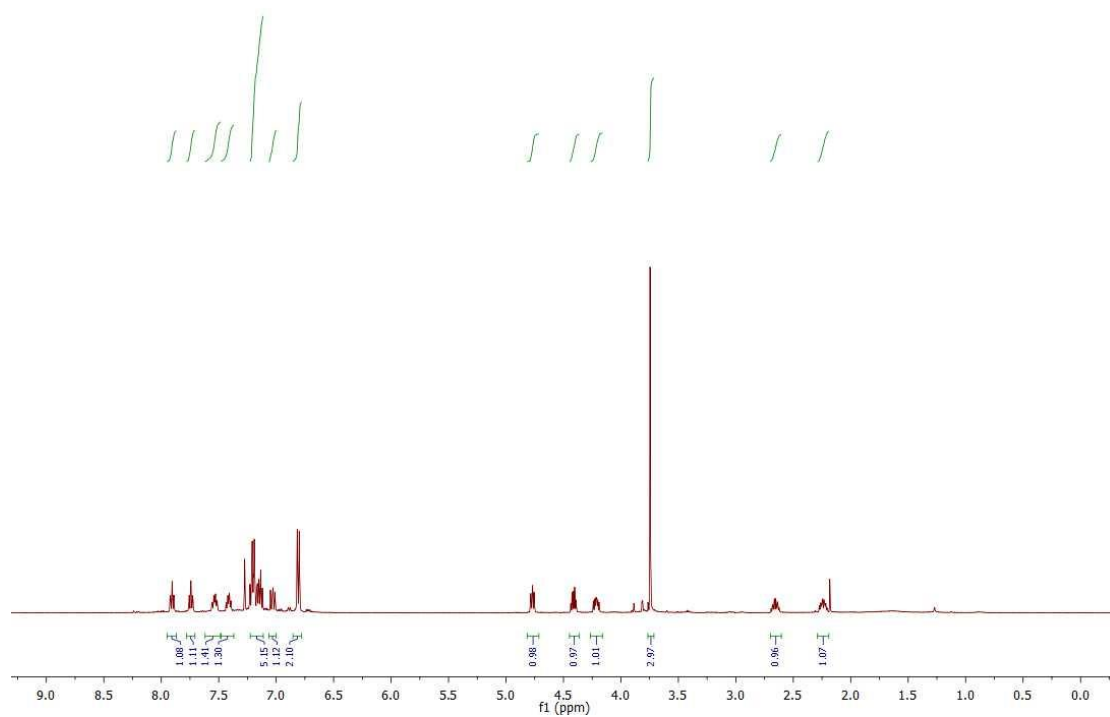

126 MHz in CDCl<sub>3</sub>

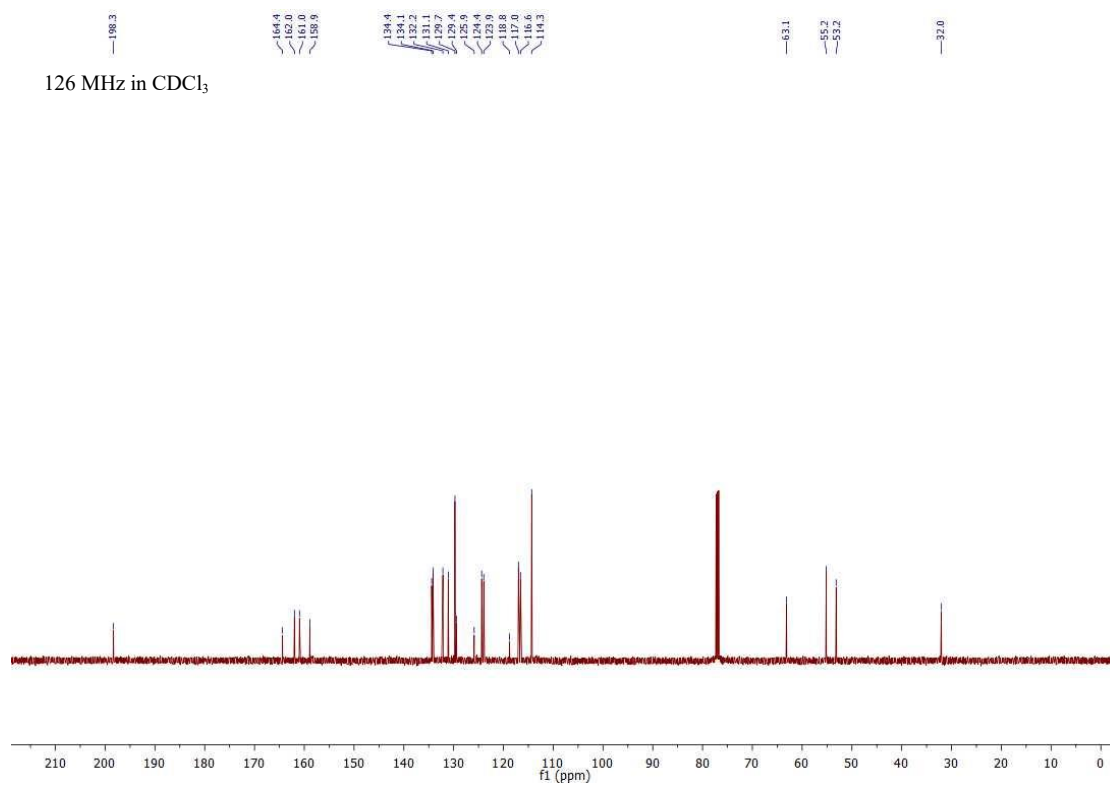

286 MHz in CDCl<sub>3</sub>

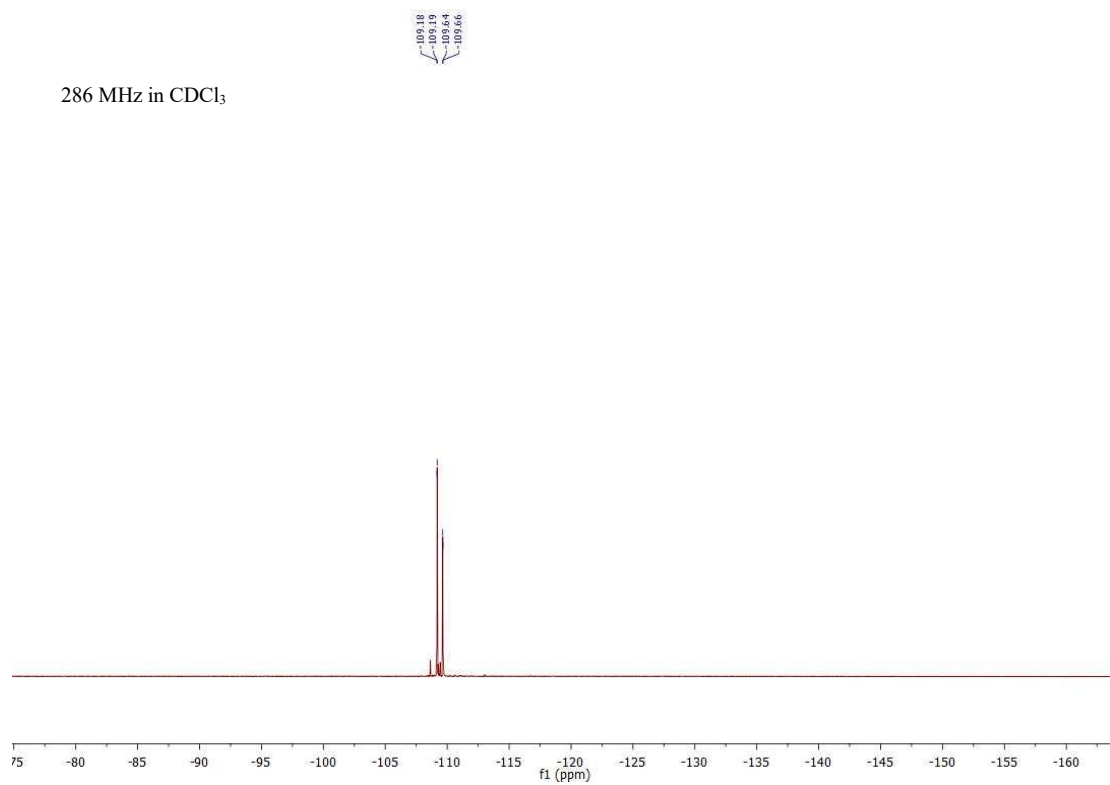



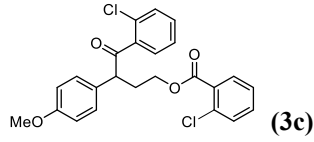

300 MHz in CDCl<sub>3</sub>

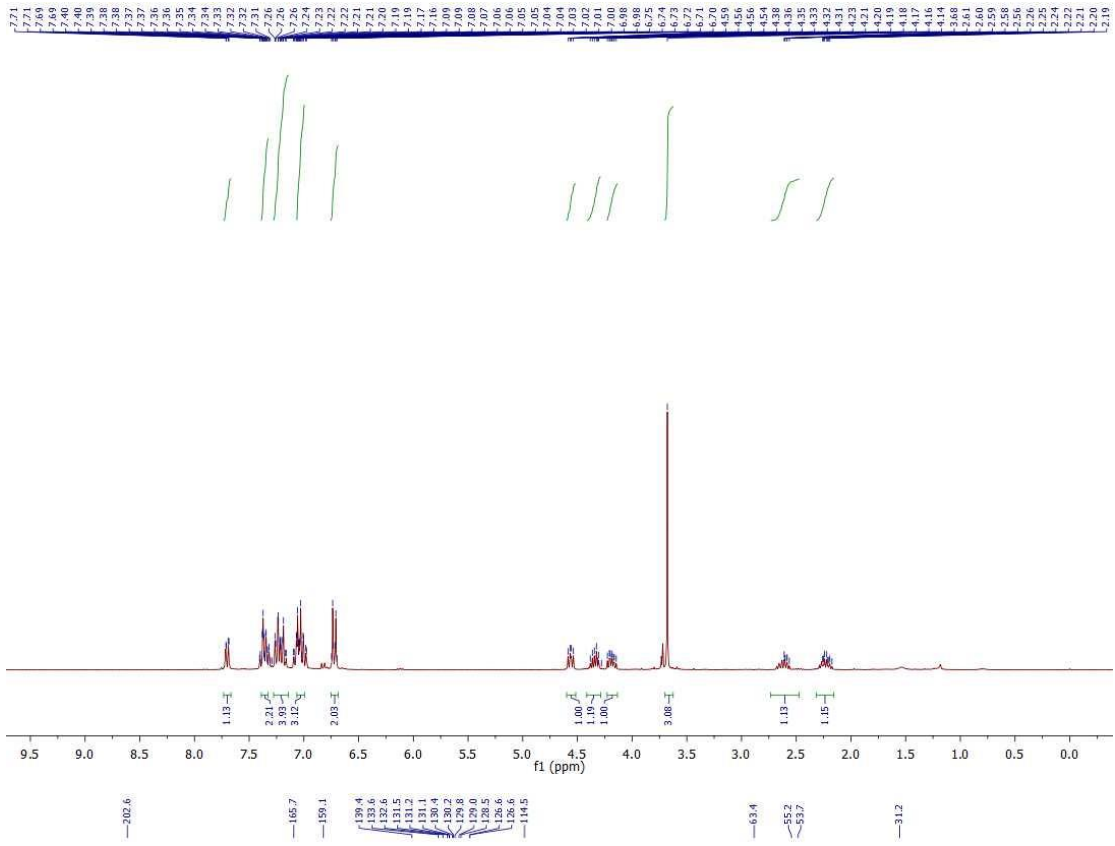

76 MHz in CDCl<sub>3</sub>

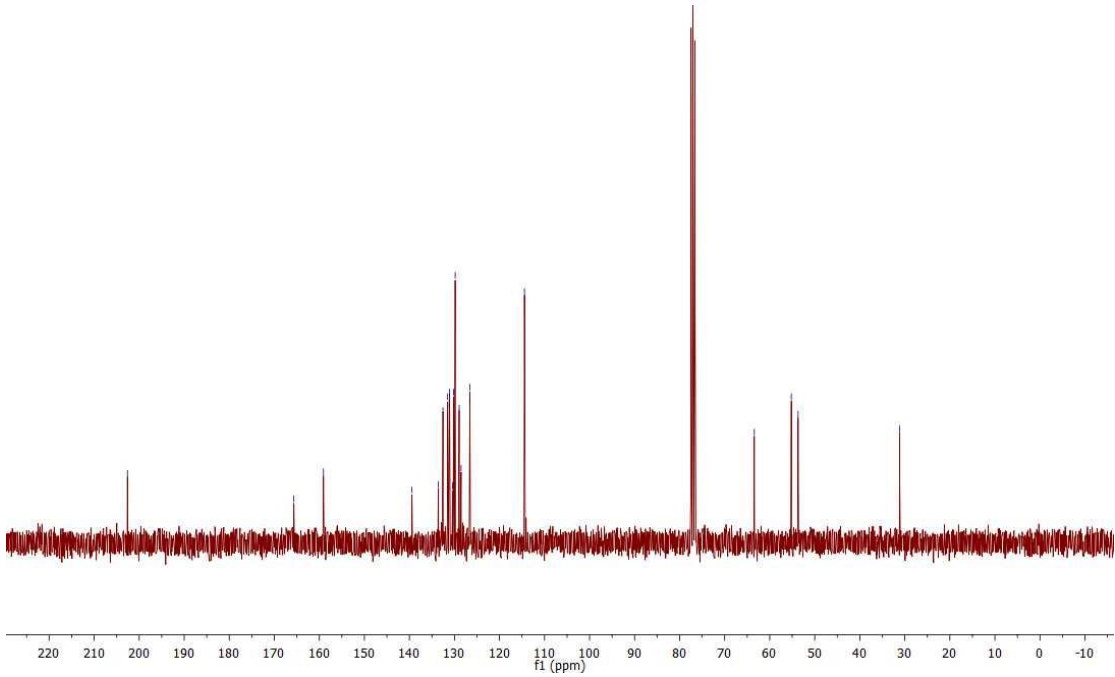

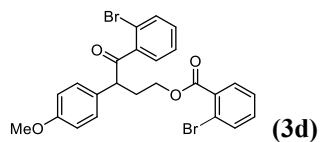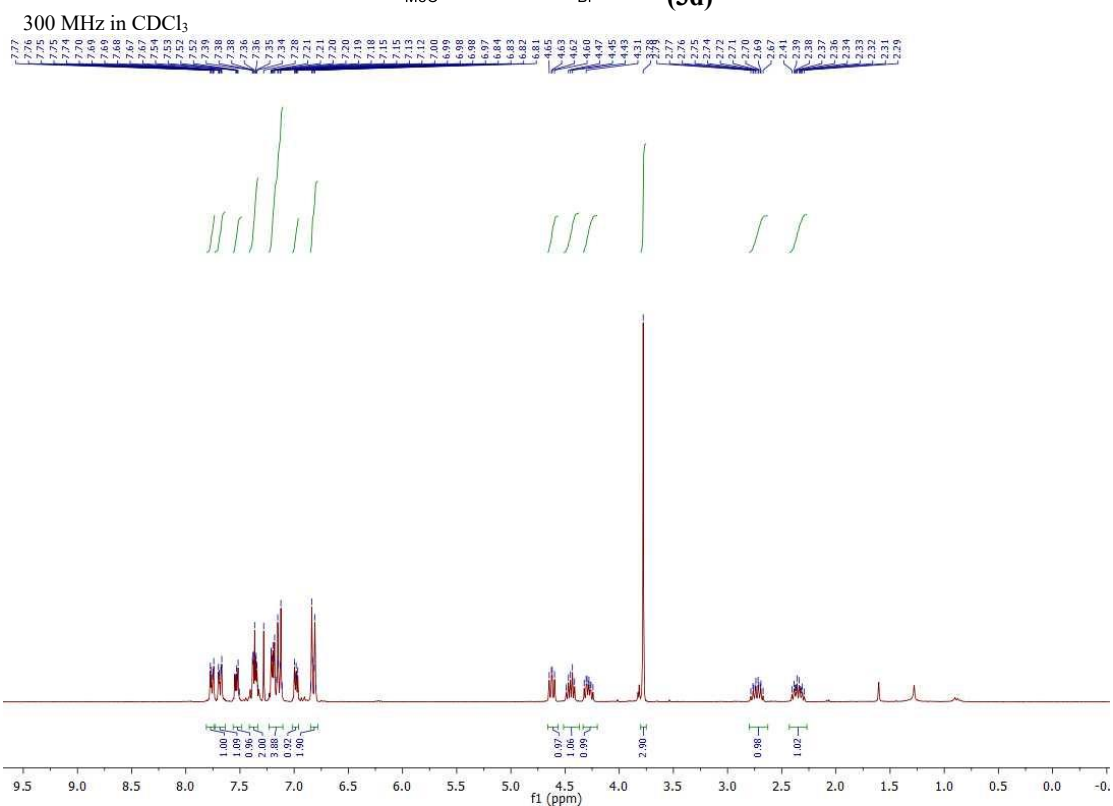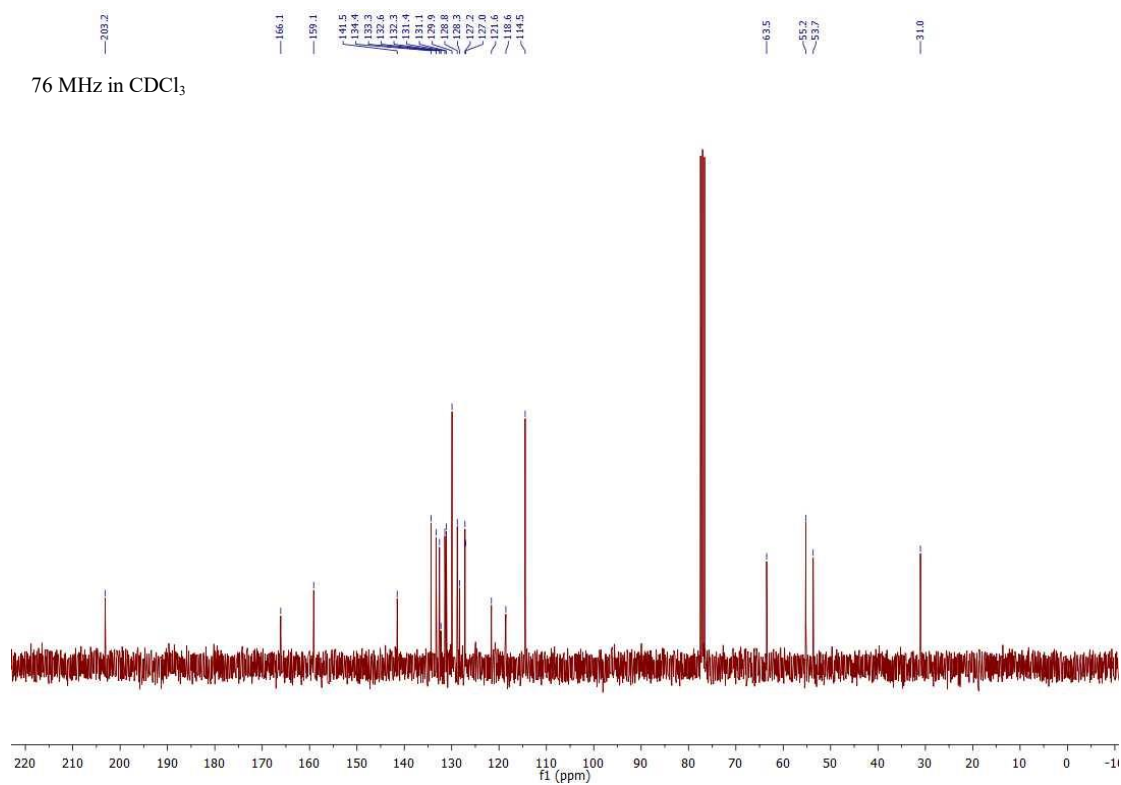

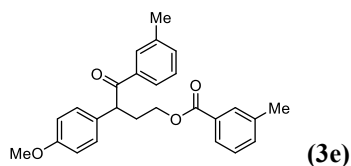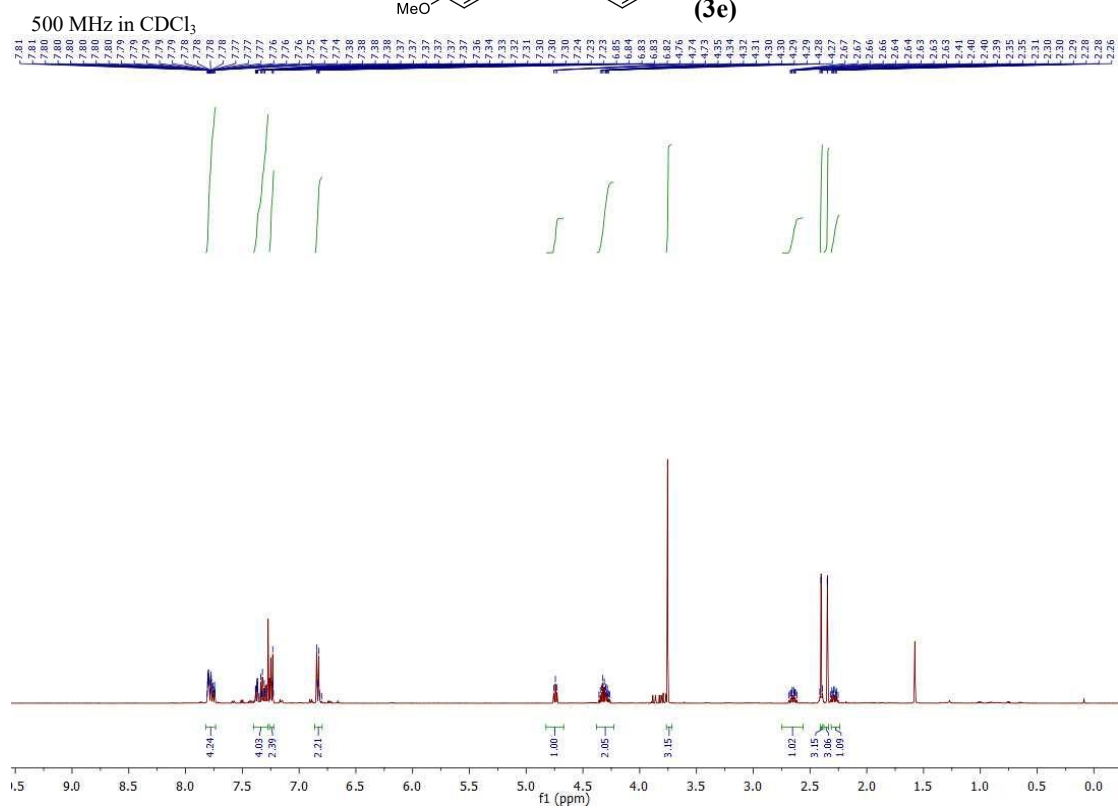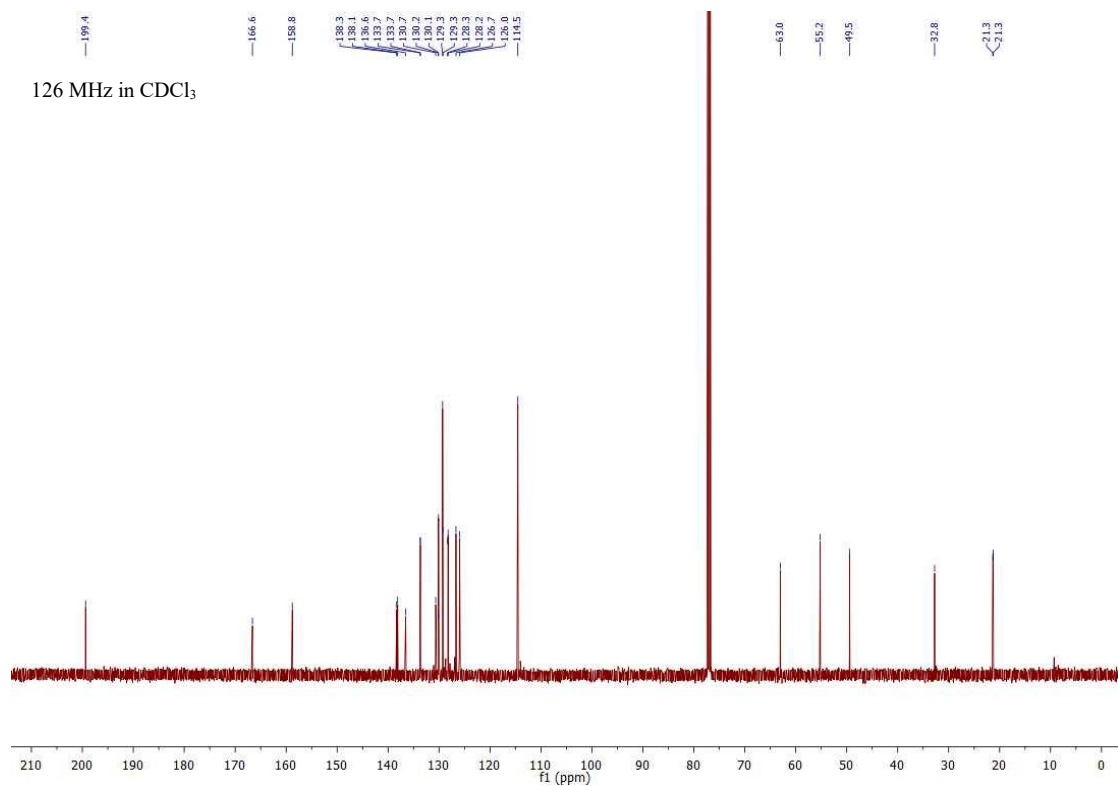

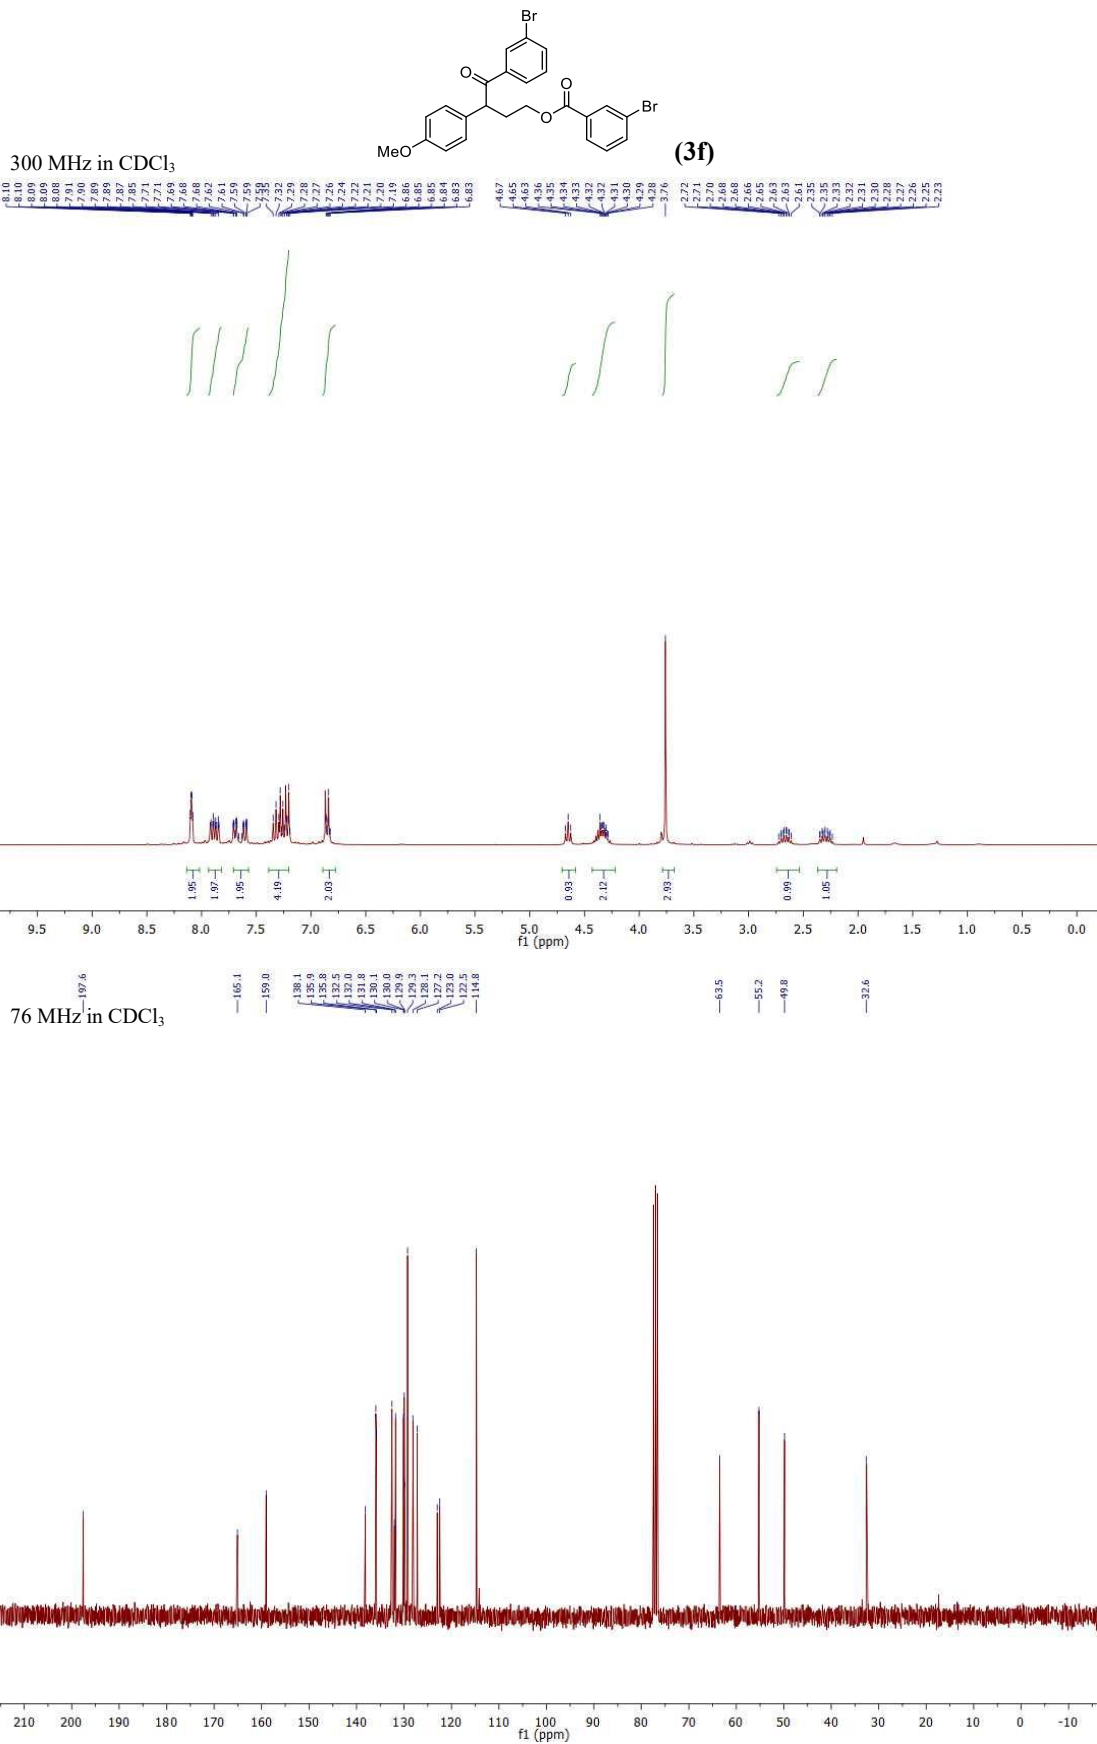

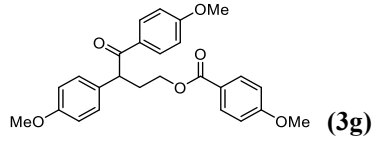

300 MHz in CDCl<sub>3</sub>

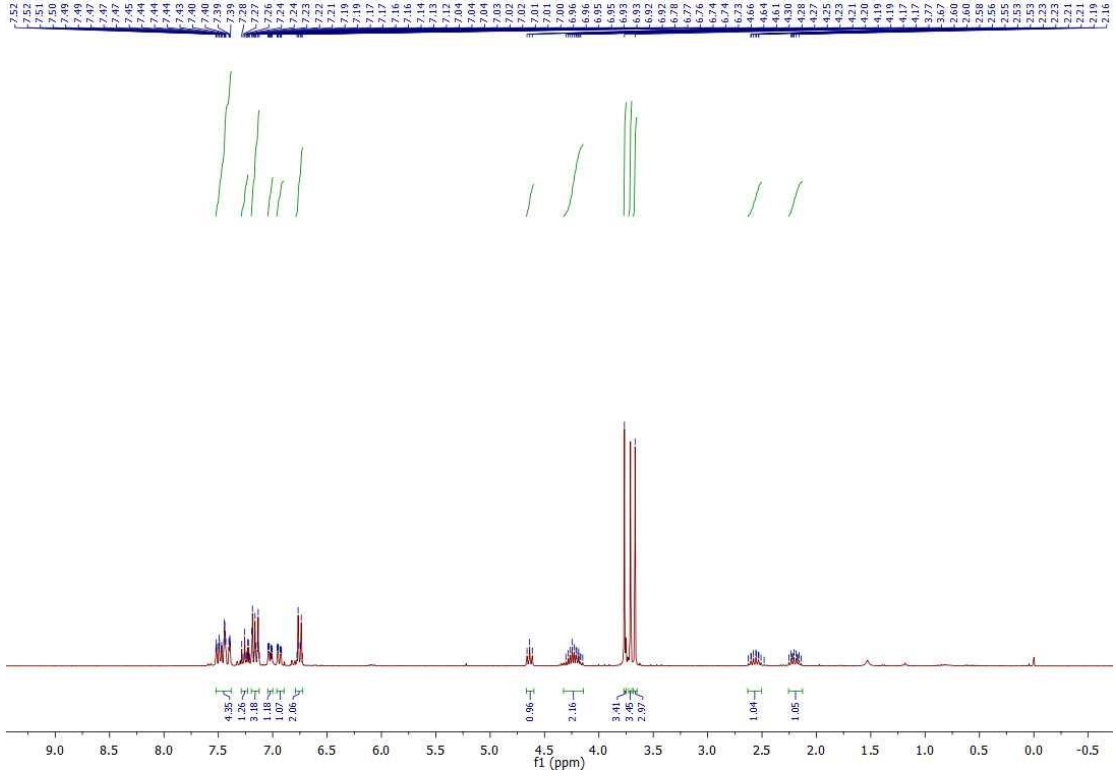

76 MHz in CDCl<sub>3</sub>

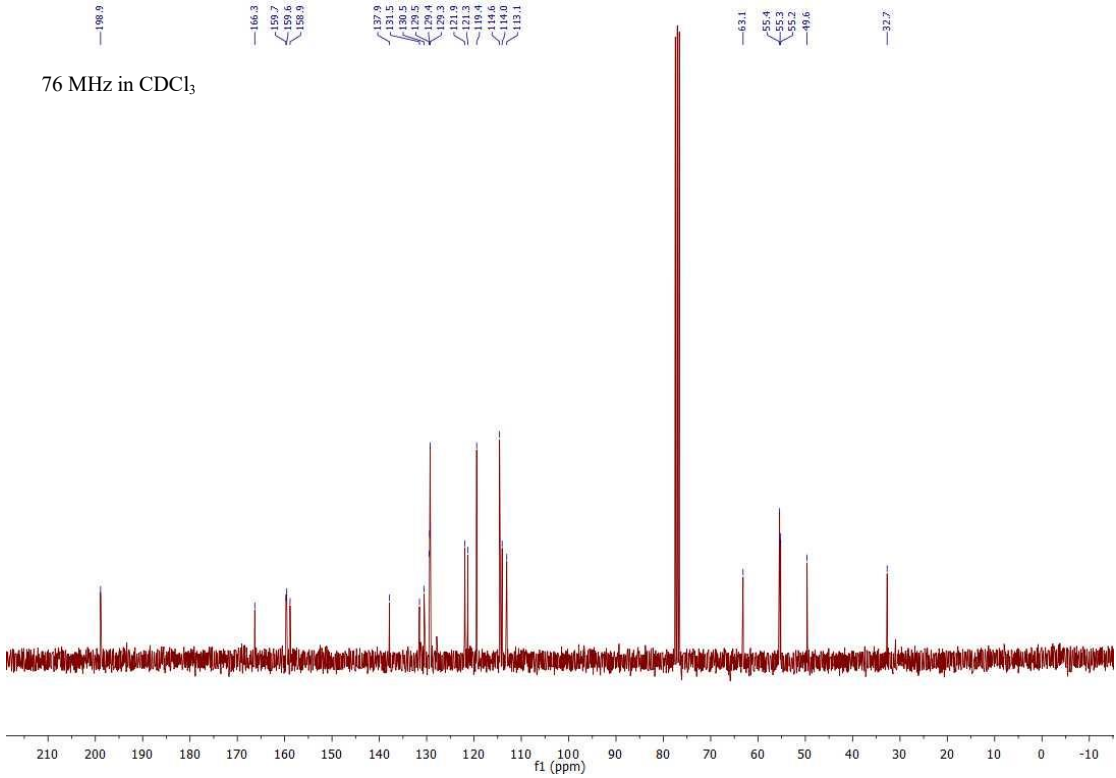

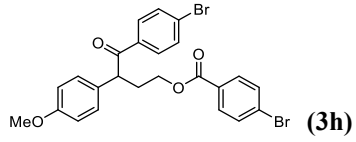

300 MHz in CDCl<sub>3</sub>

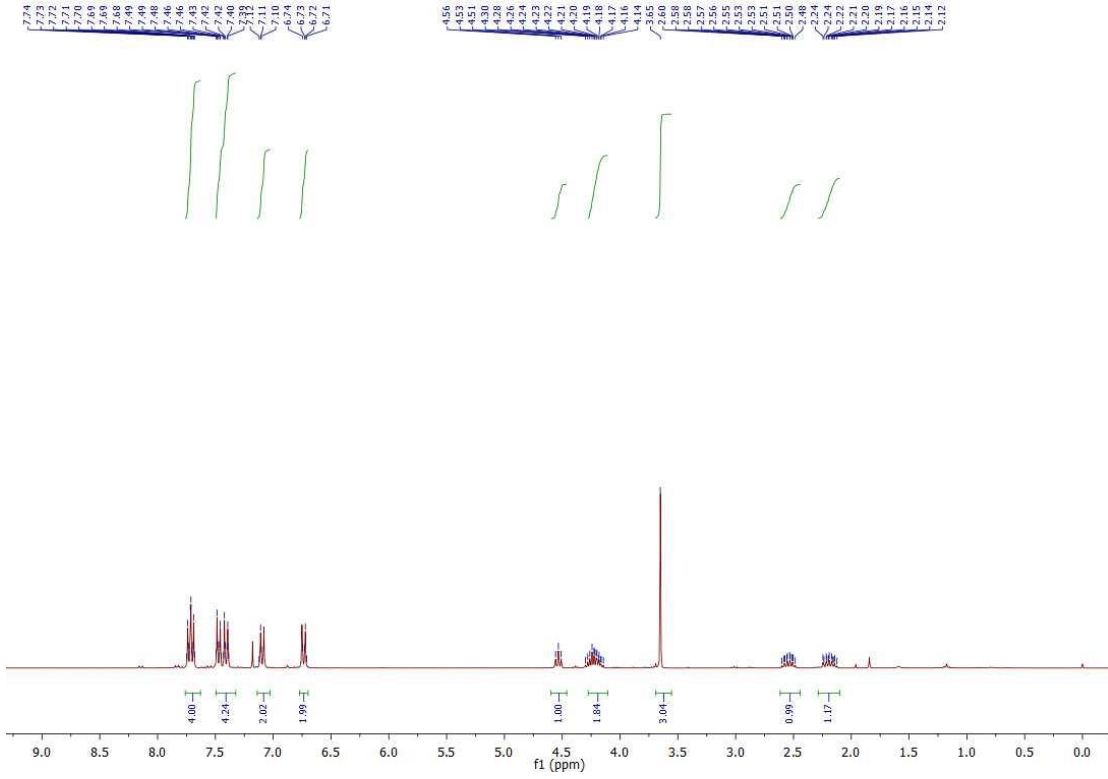

76 MHz in CDCl<sub>3</sub>

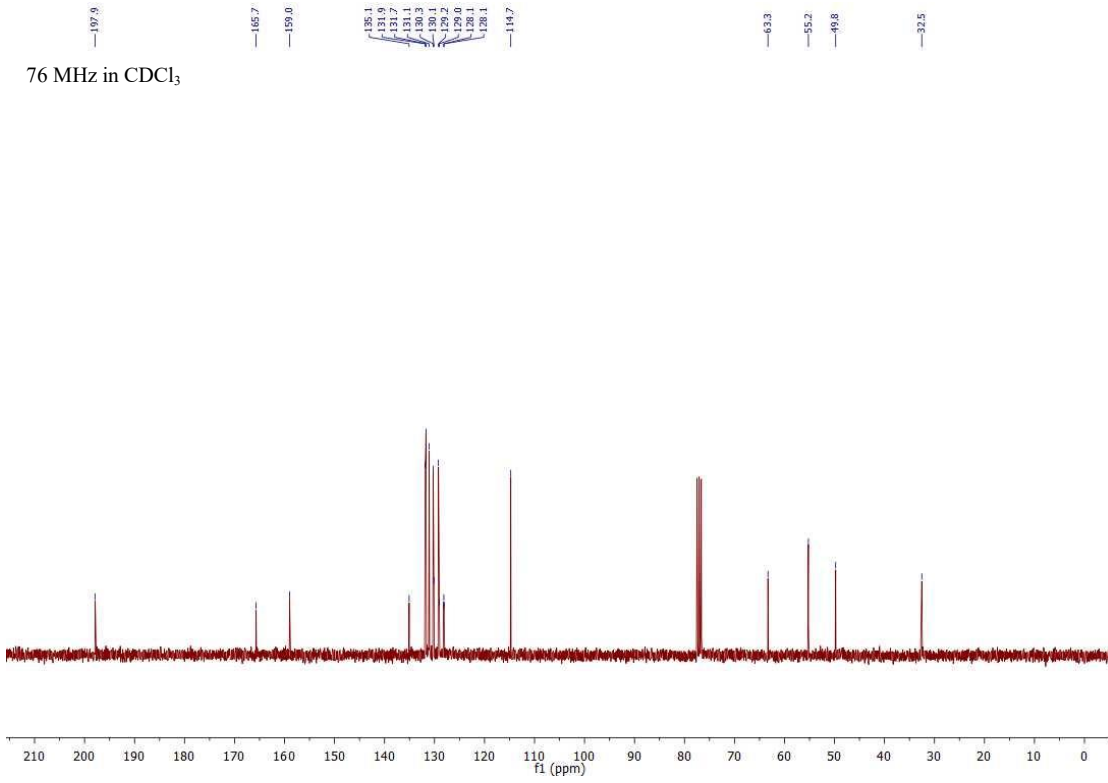

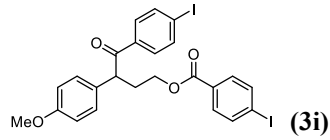

300 MHz in CDCl<sub>3</sub>

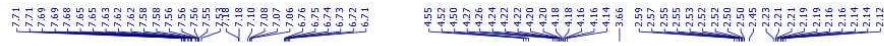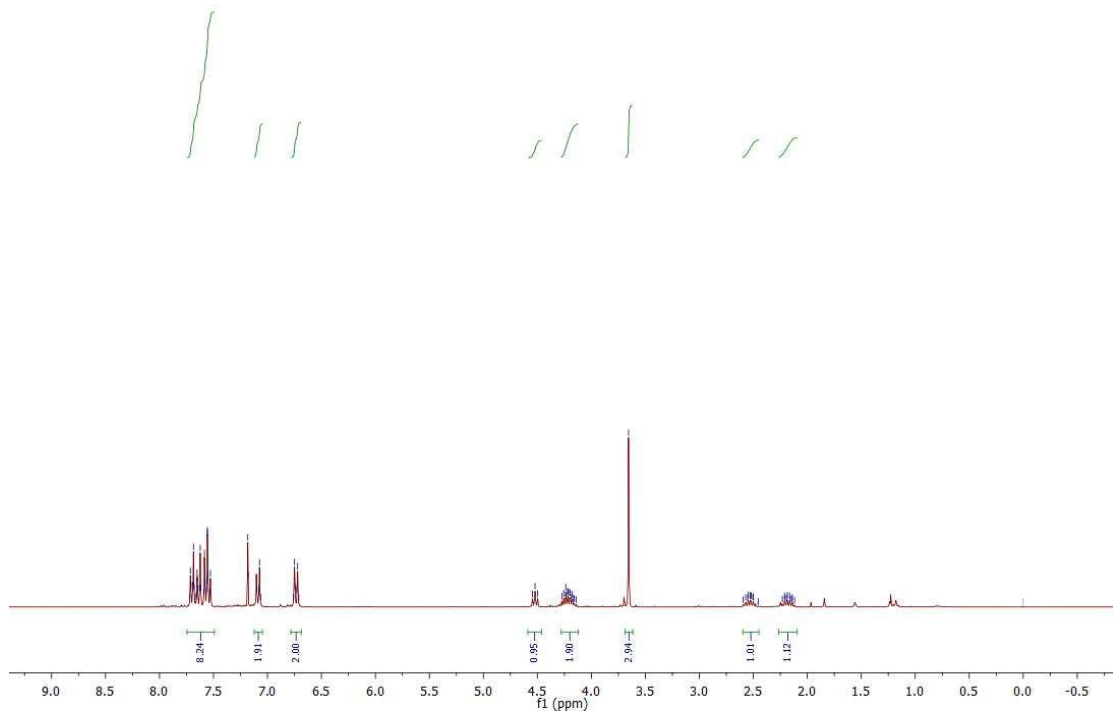

76 MHz in CDCl<sub>3</sub>

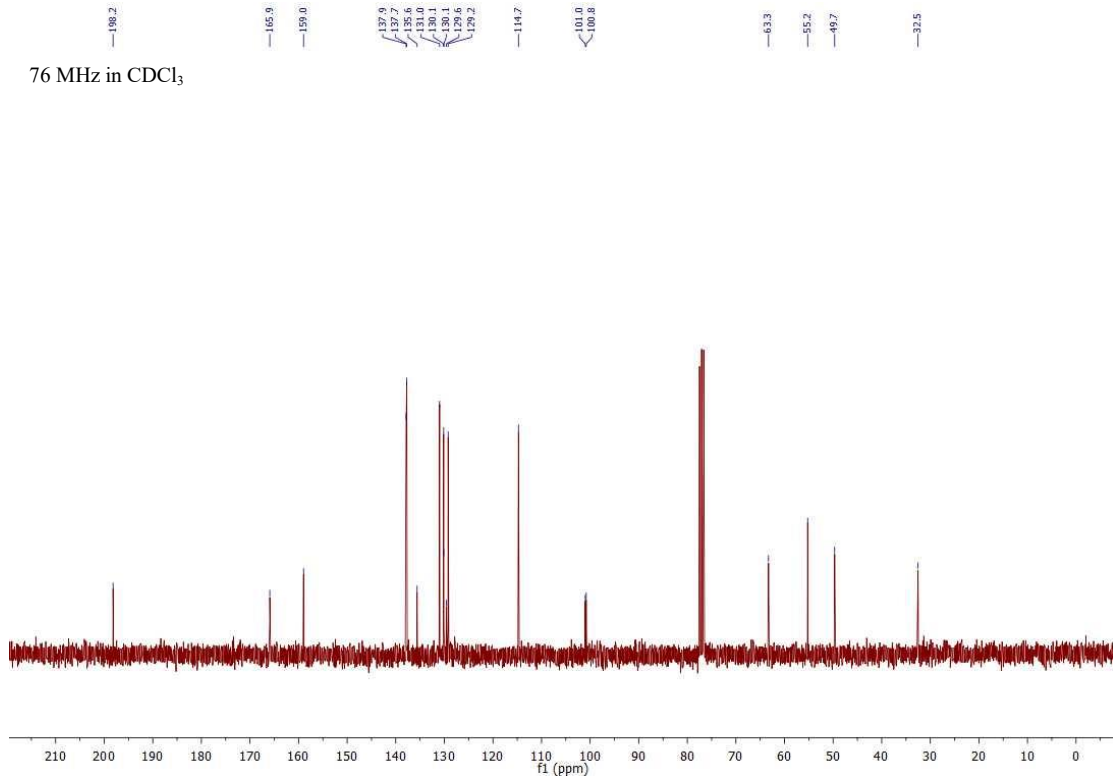

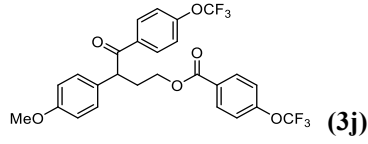

300 MHz in CDCl<sub>3</sub>

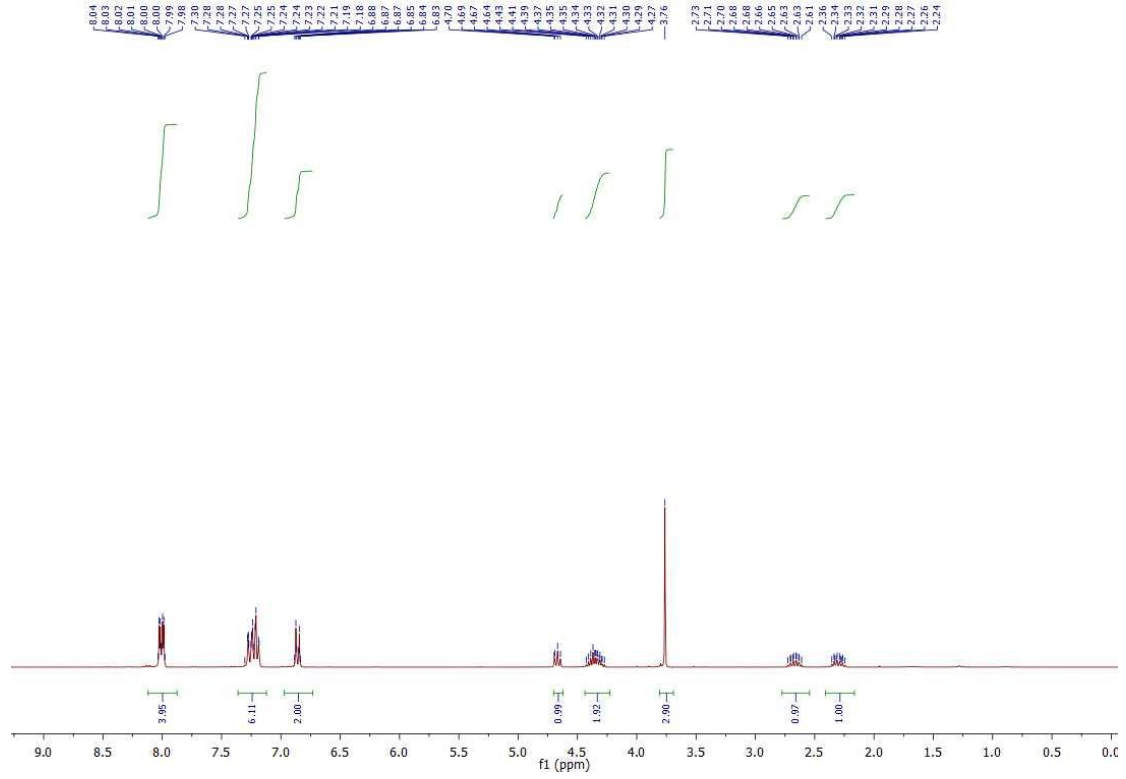

76 MHz in CDCl<sub>3</sub>

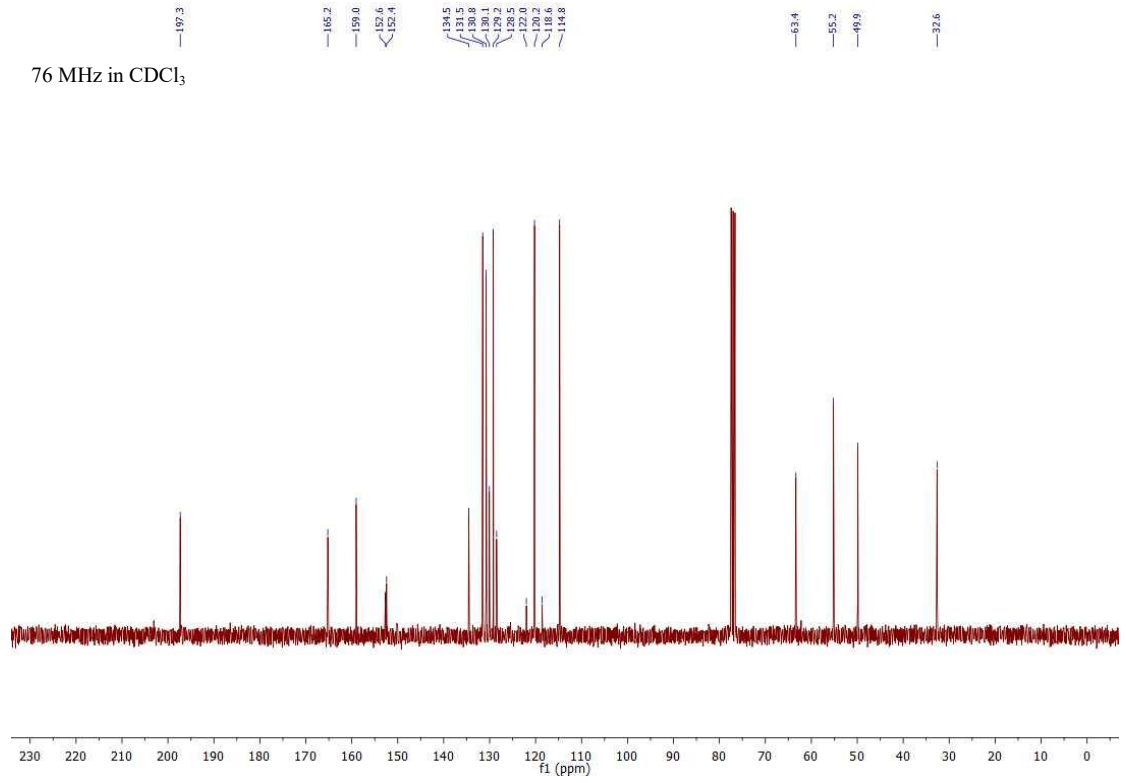



282 MHz in CDCl<sub>3</sub>

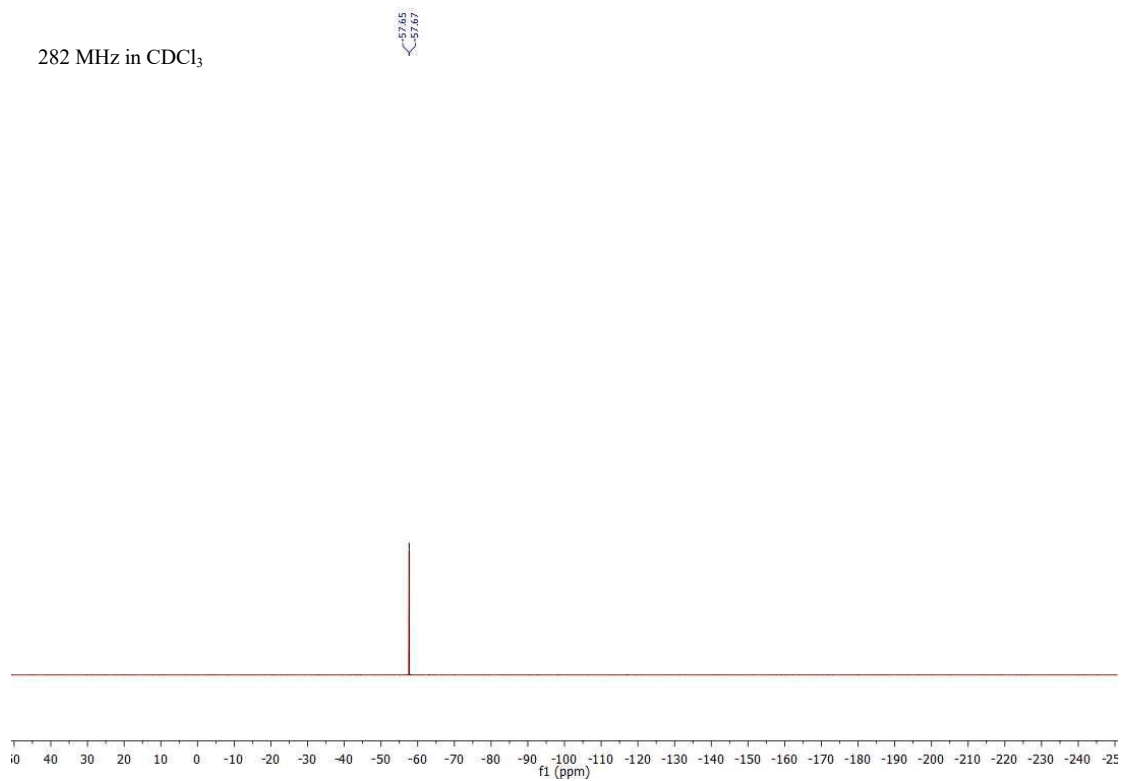

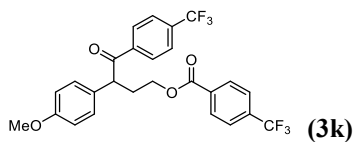

300 MHz in CDCl<sub>3</sub>

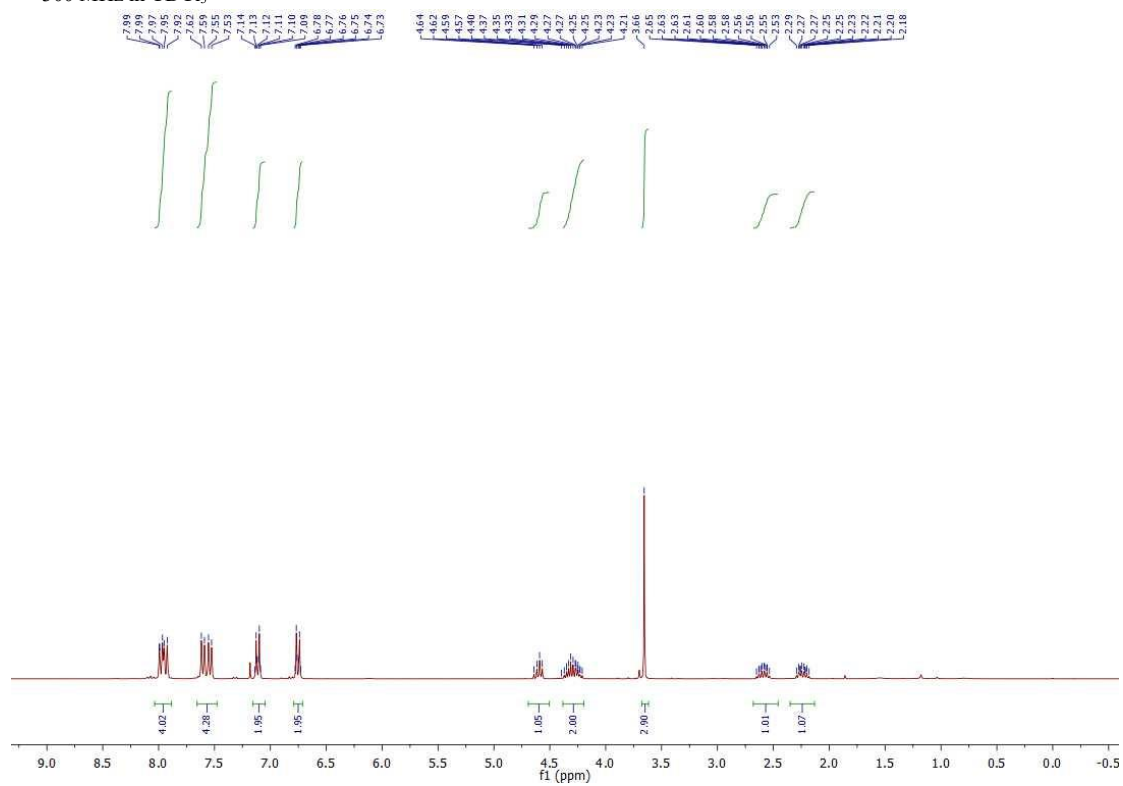

76 MHz in CDCl<sub>3</sub>

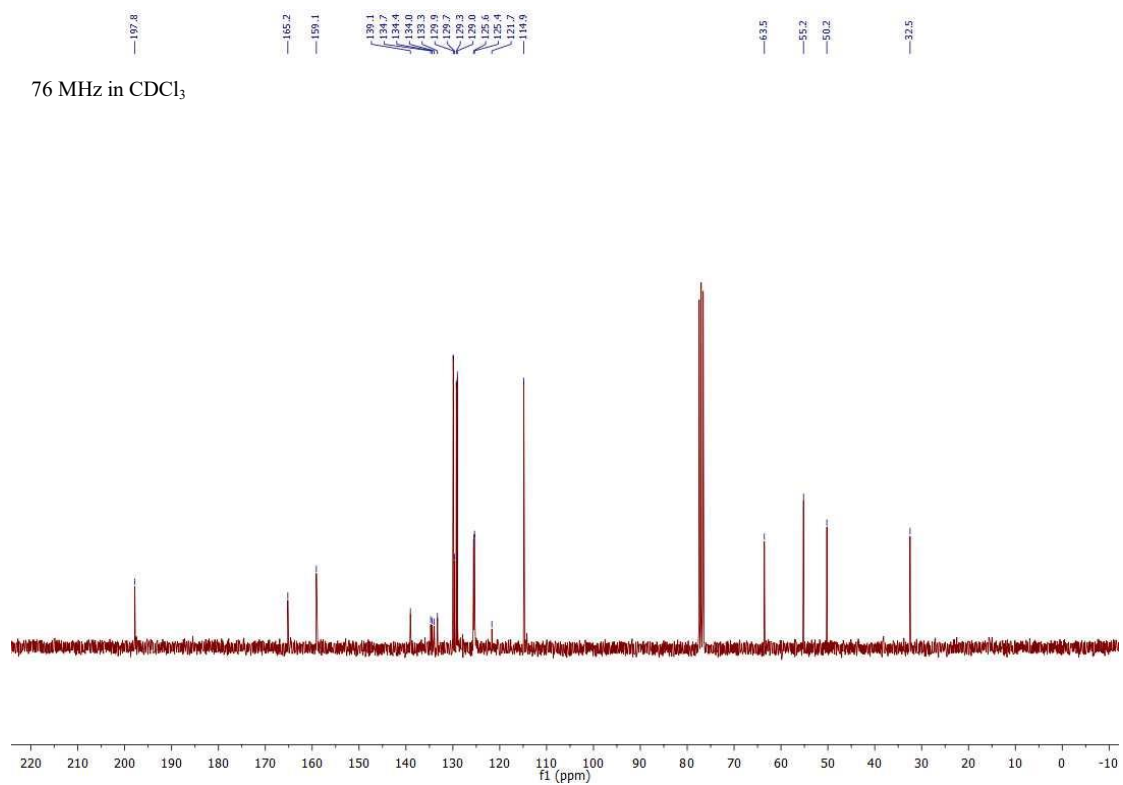

282 MHz in CDCl<sub>3</sub>

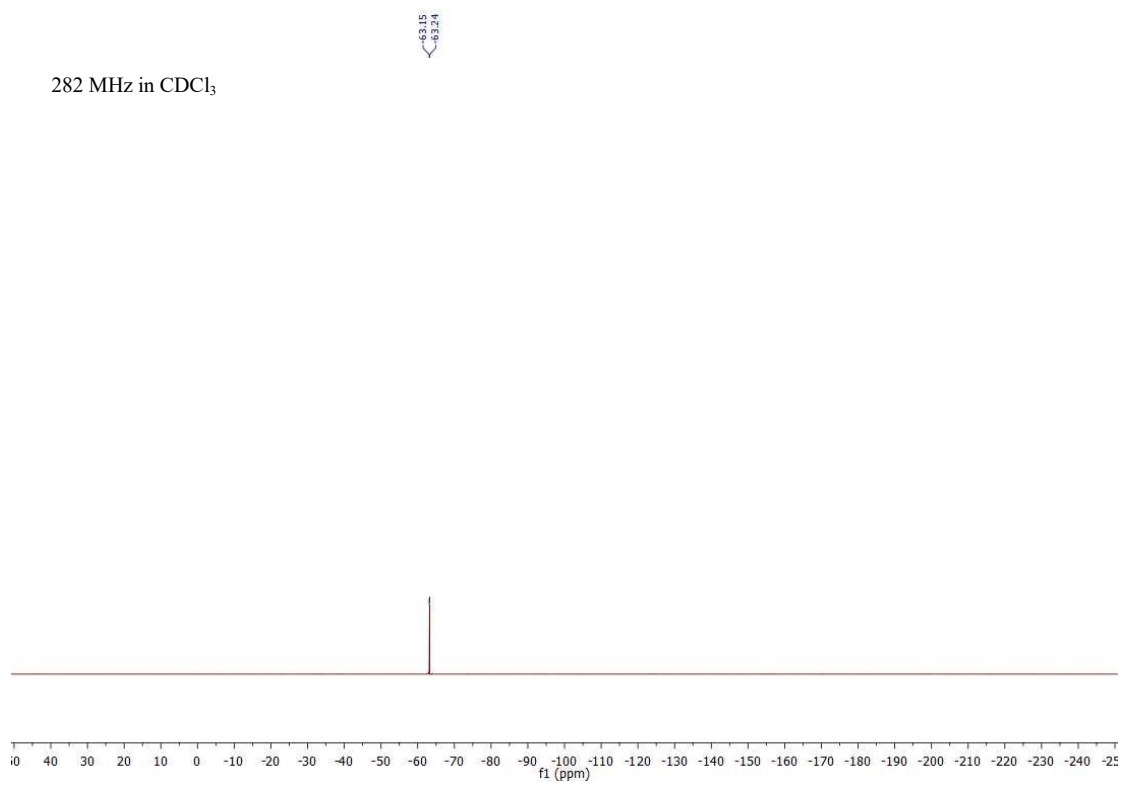

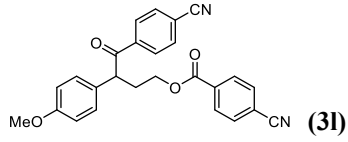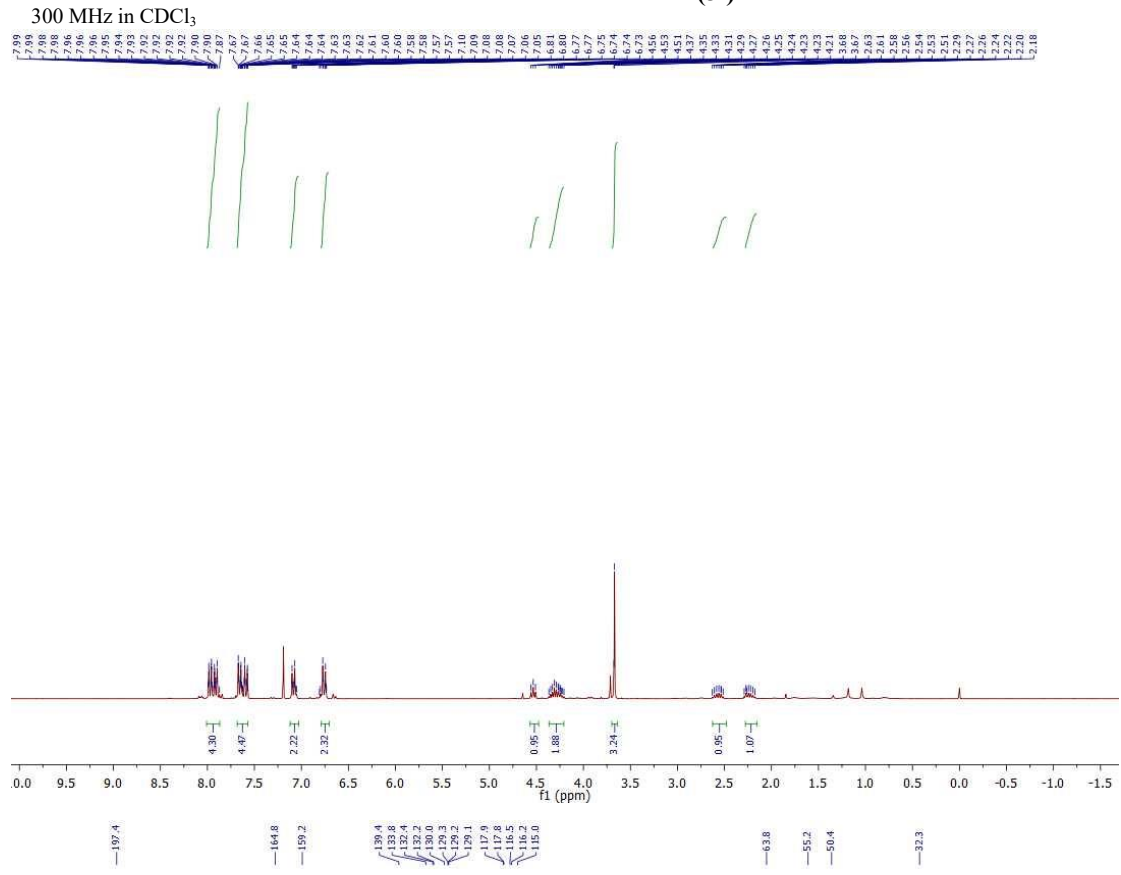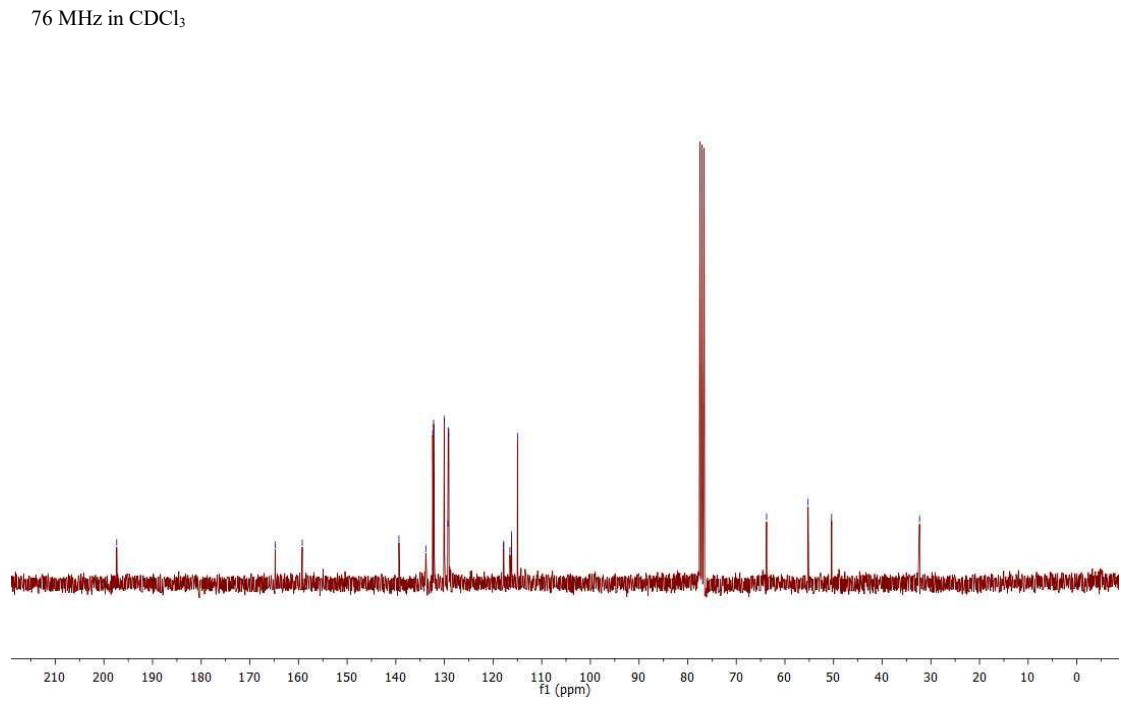

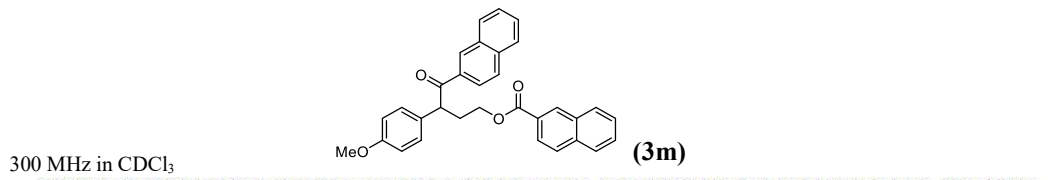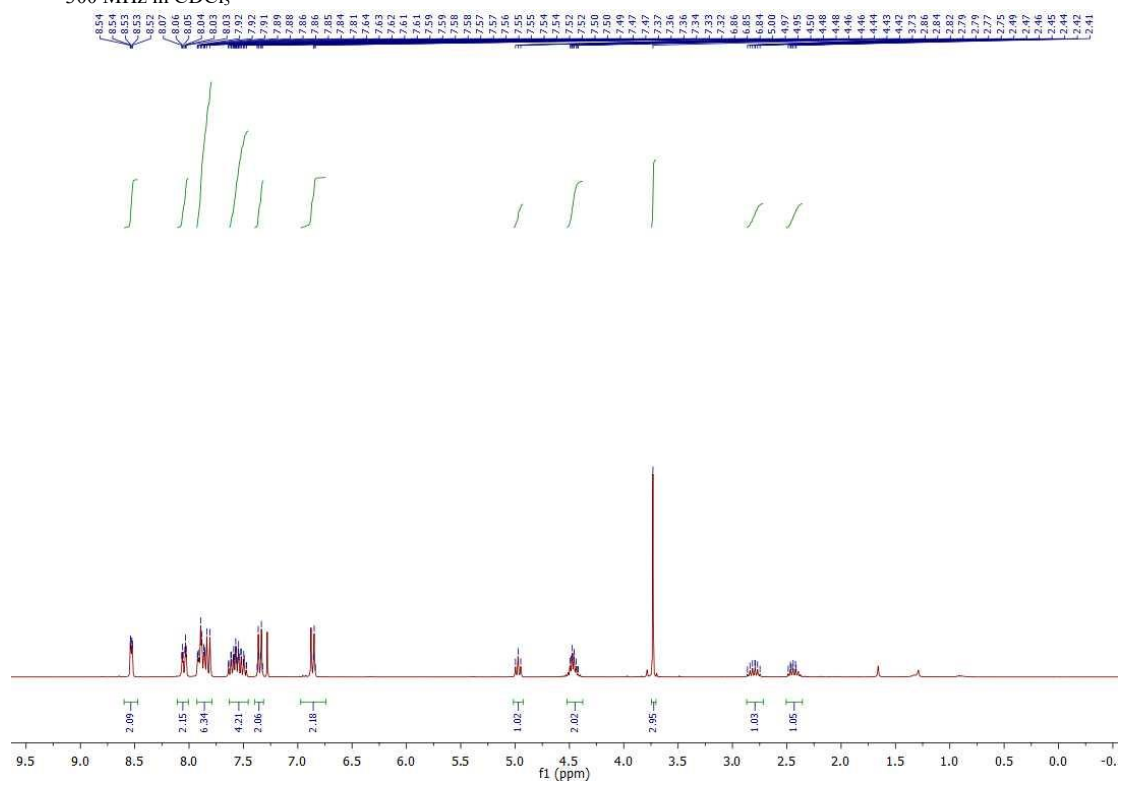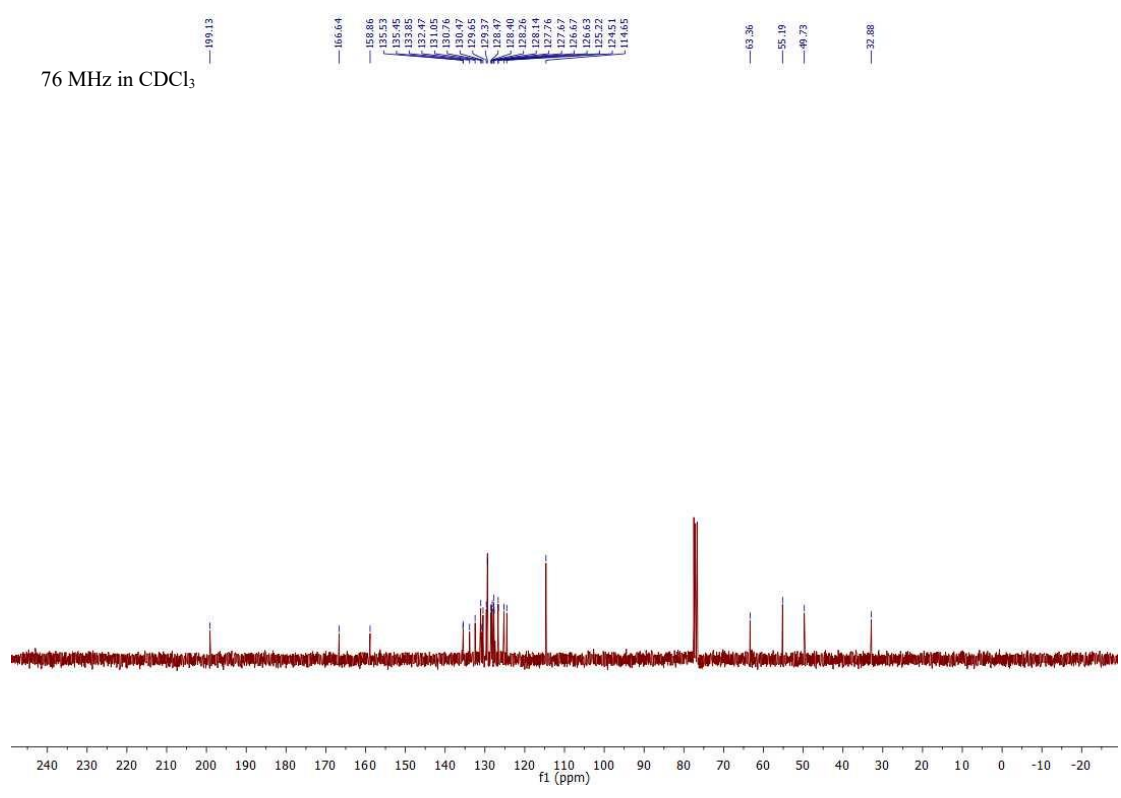

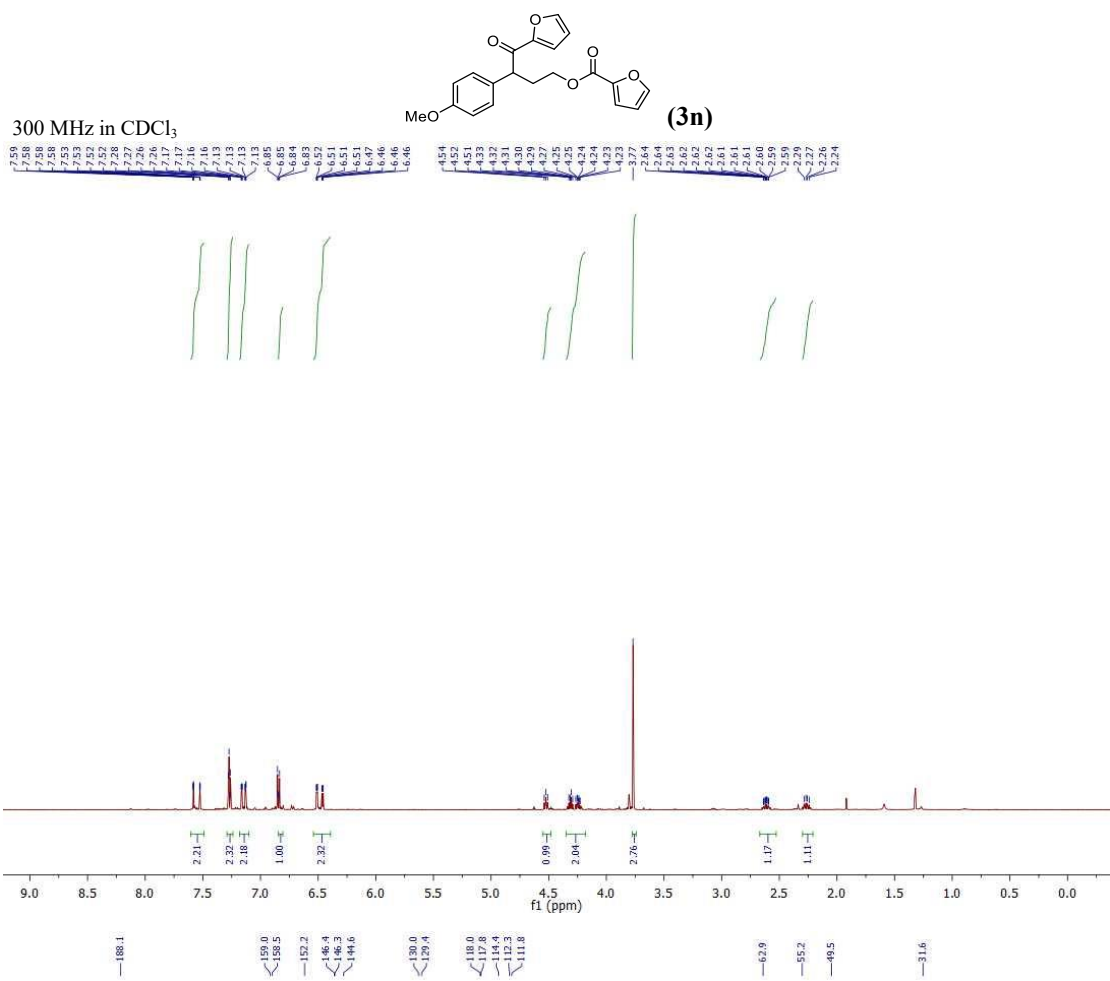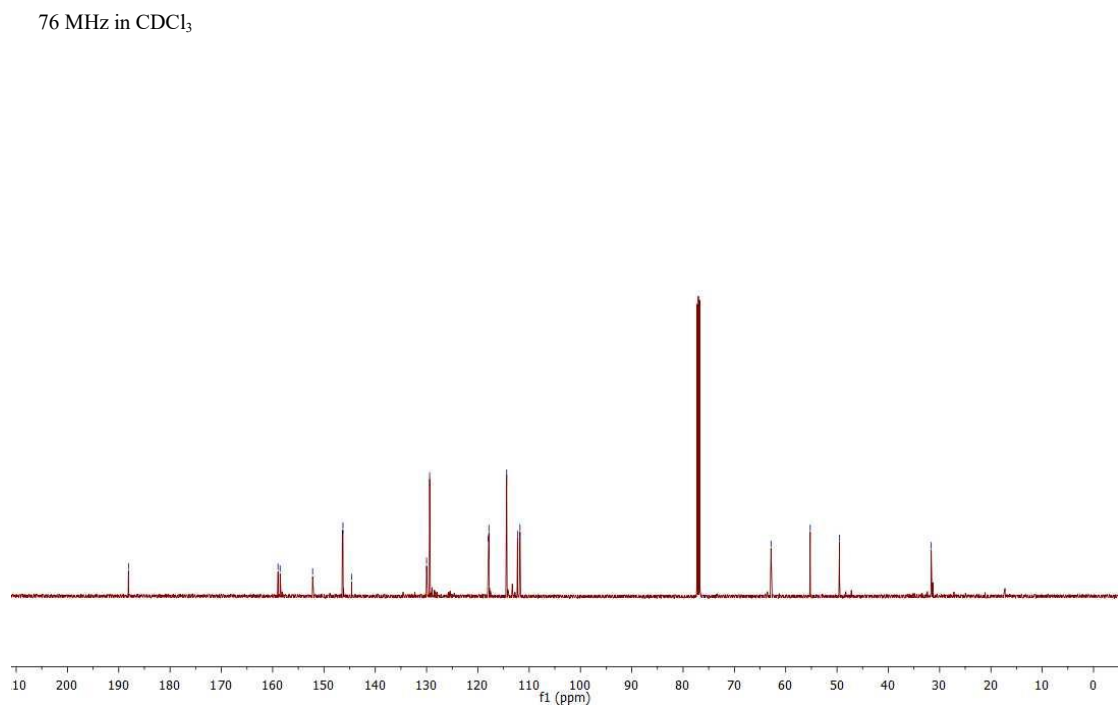

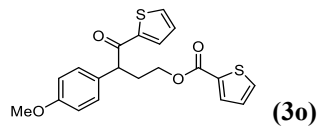

500 MHz in CDCl<sub>3</sub>

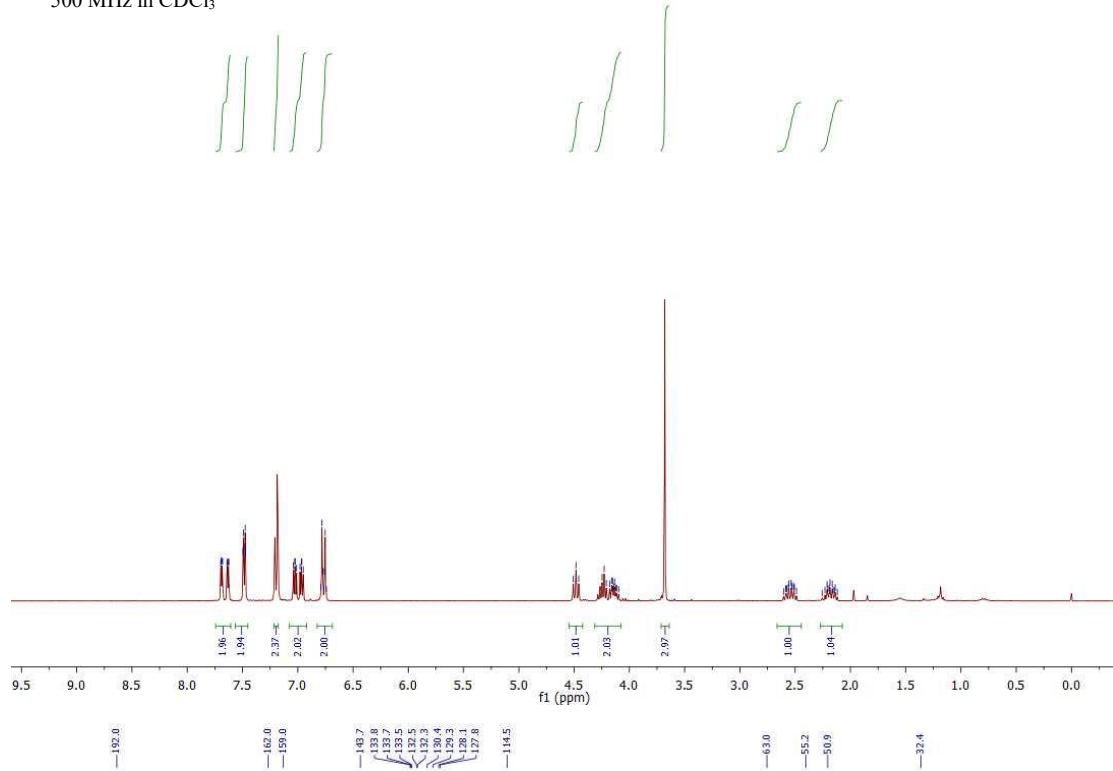

126 MHz in CDCl<sub>3</sub>

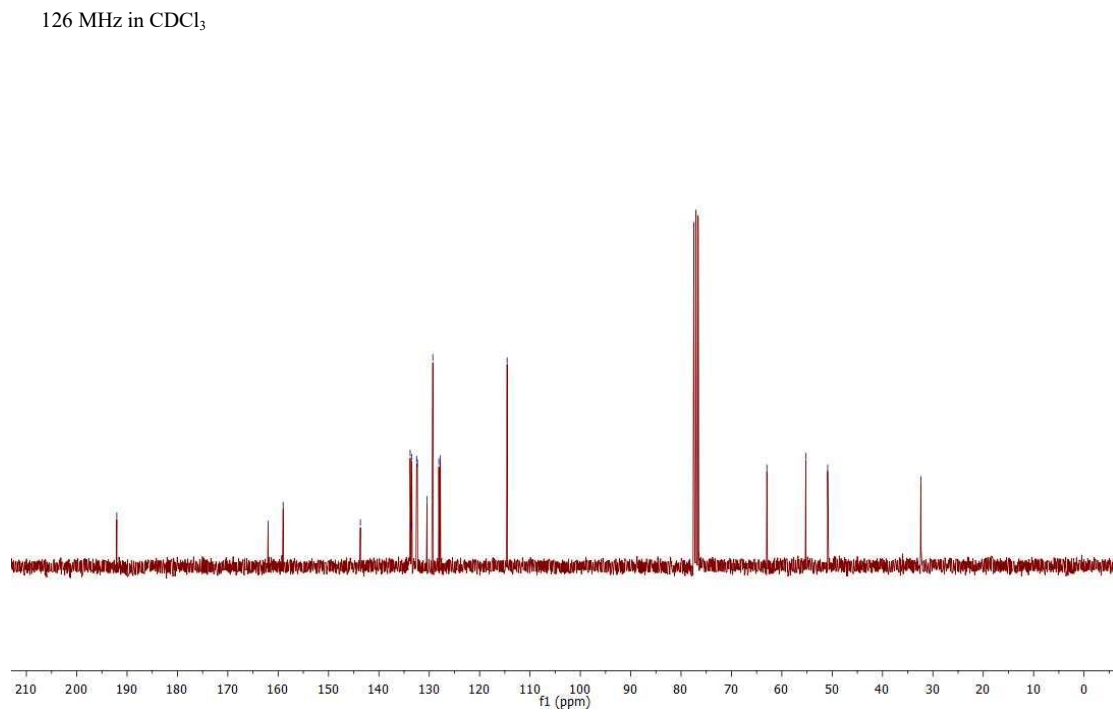

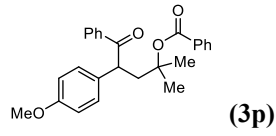

300 MHz in CDCl<sub>3</sub>

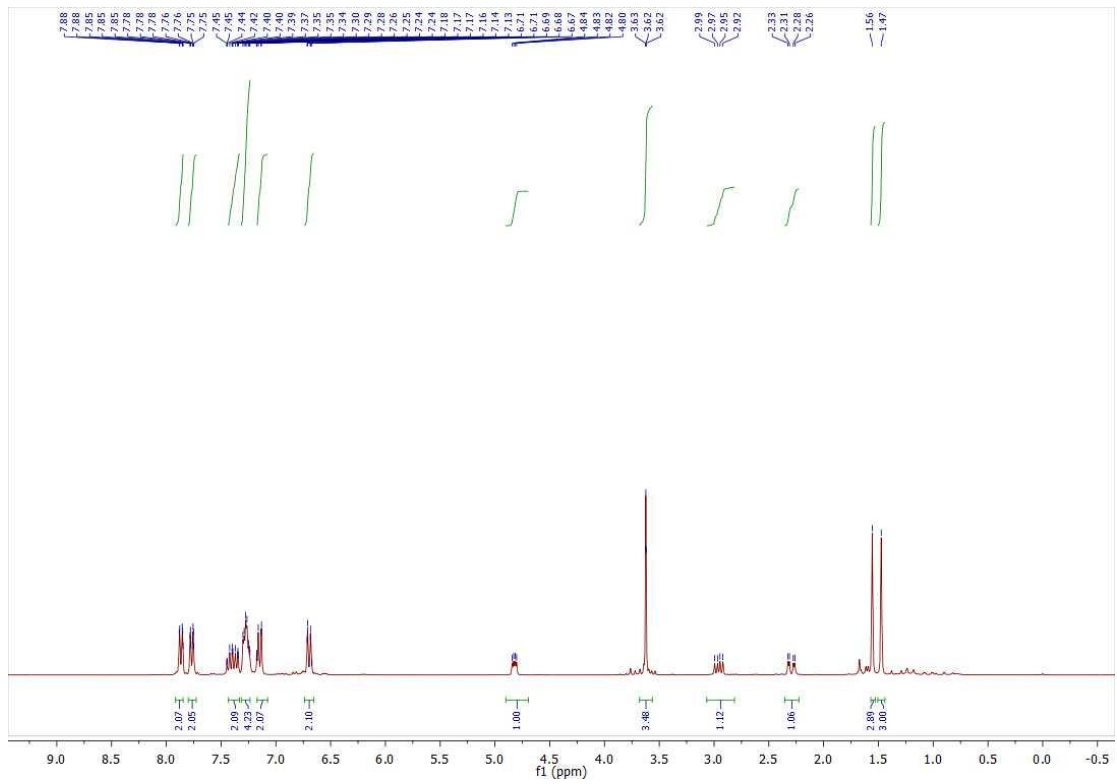

76 MHz in CDCl<sub>3</sub>

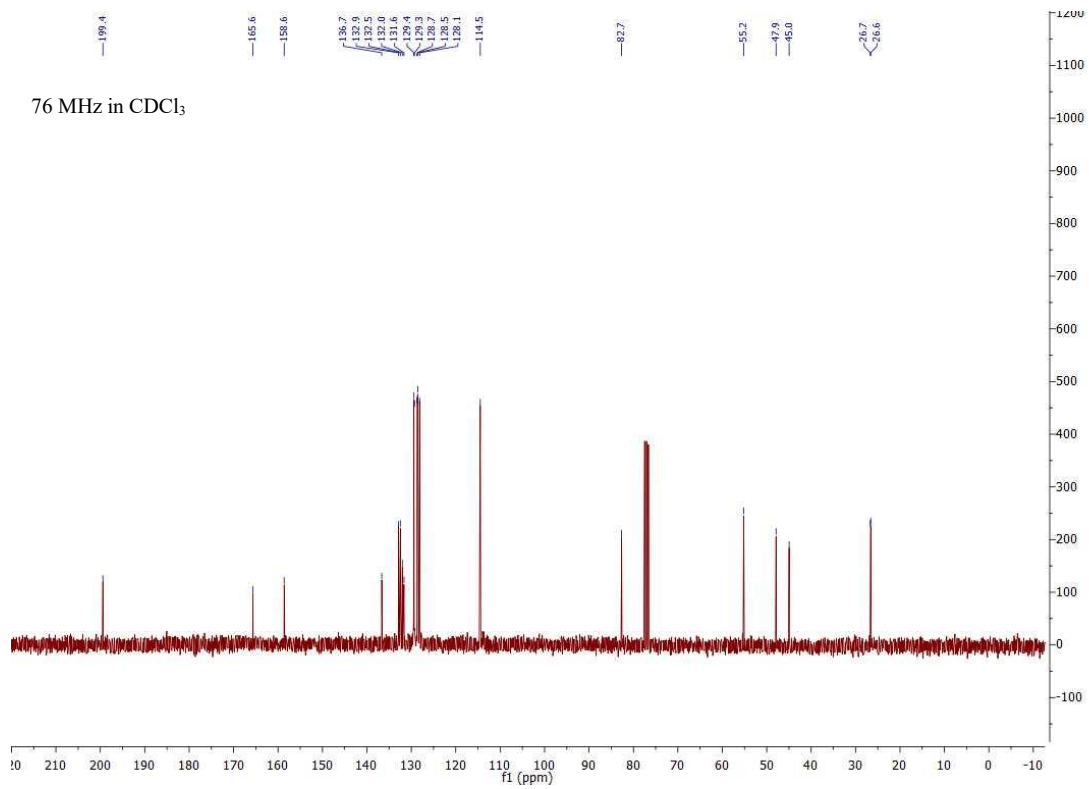



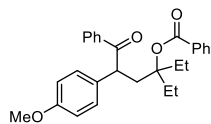

**(3q)**

300 MHz in CDCl<sub>3</sub>

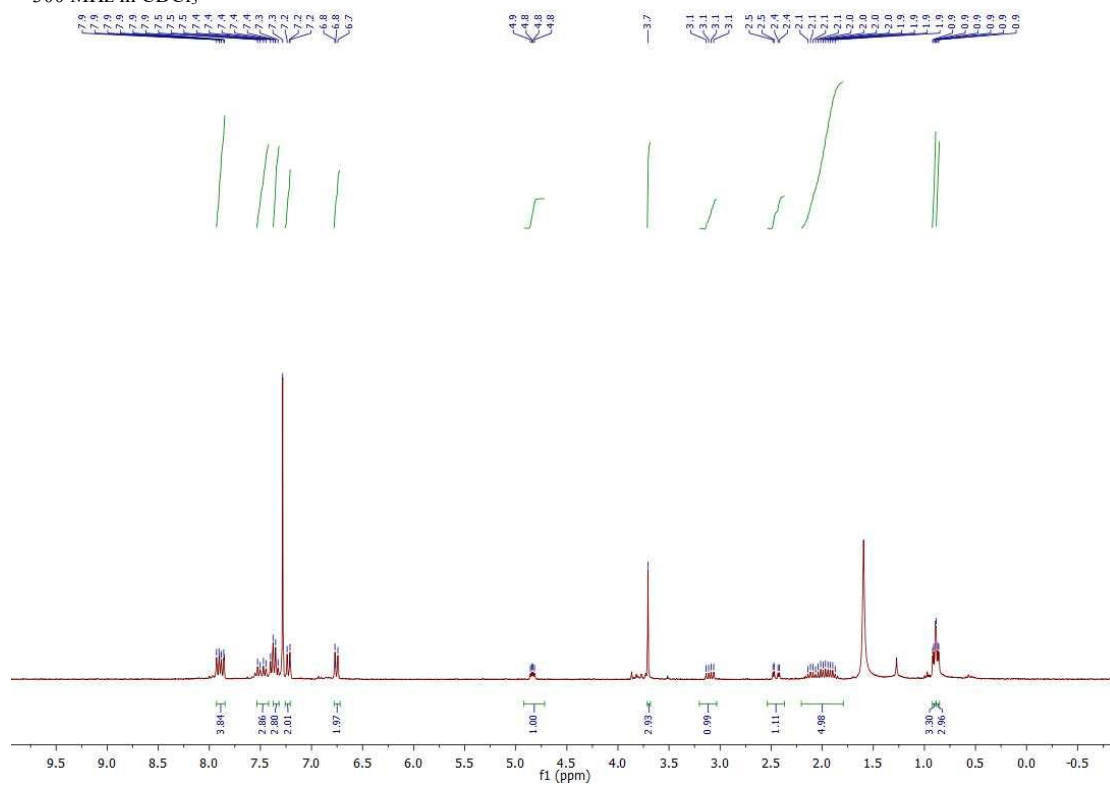

76 MHz in CDCl<sub>3</sub>

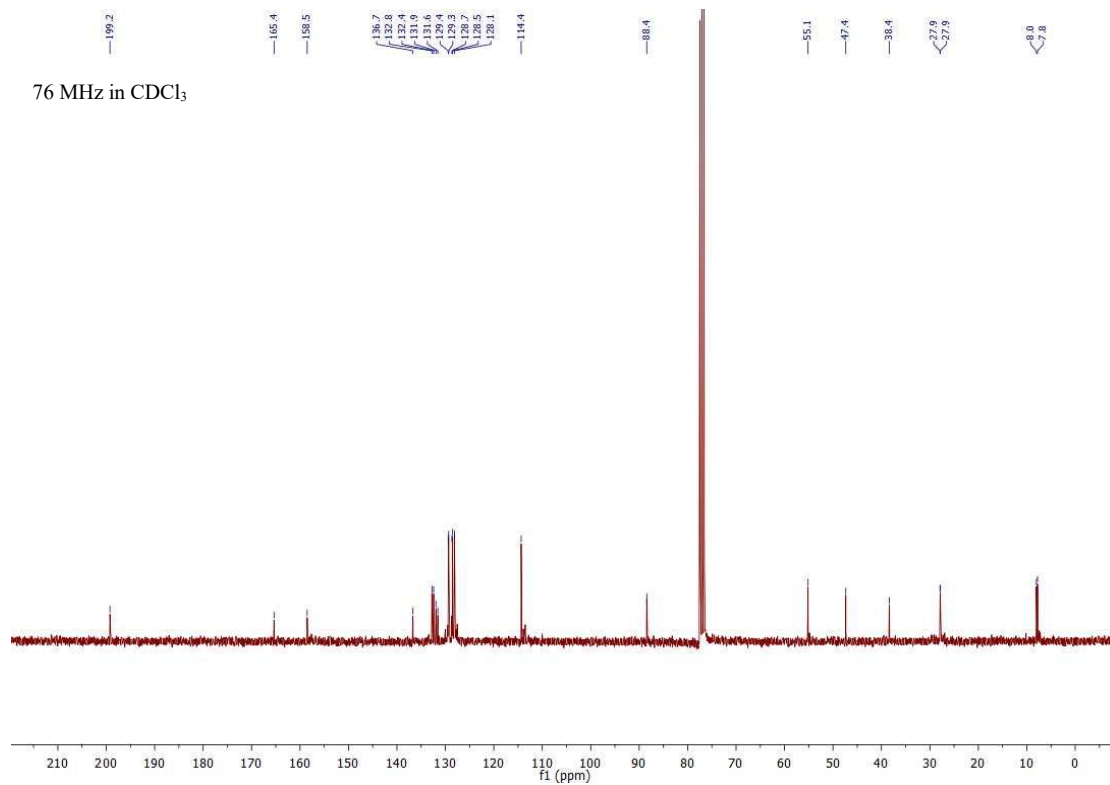

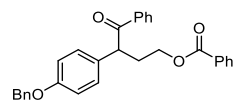

**(3r)**

300 MHz in CDCl<sub>3</sub>

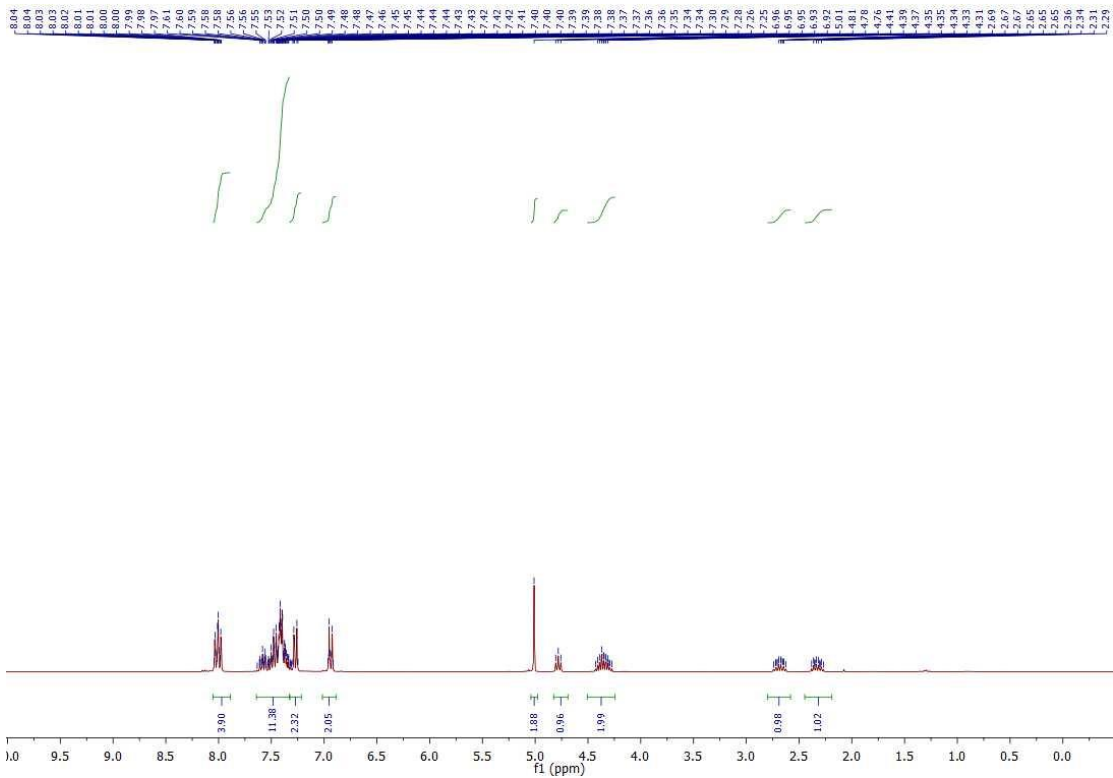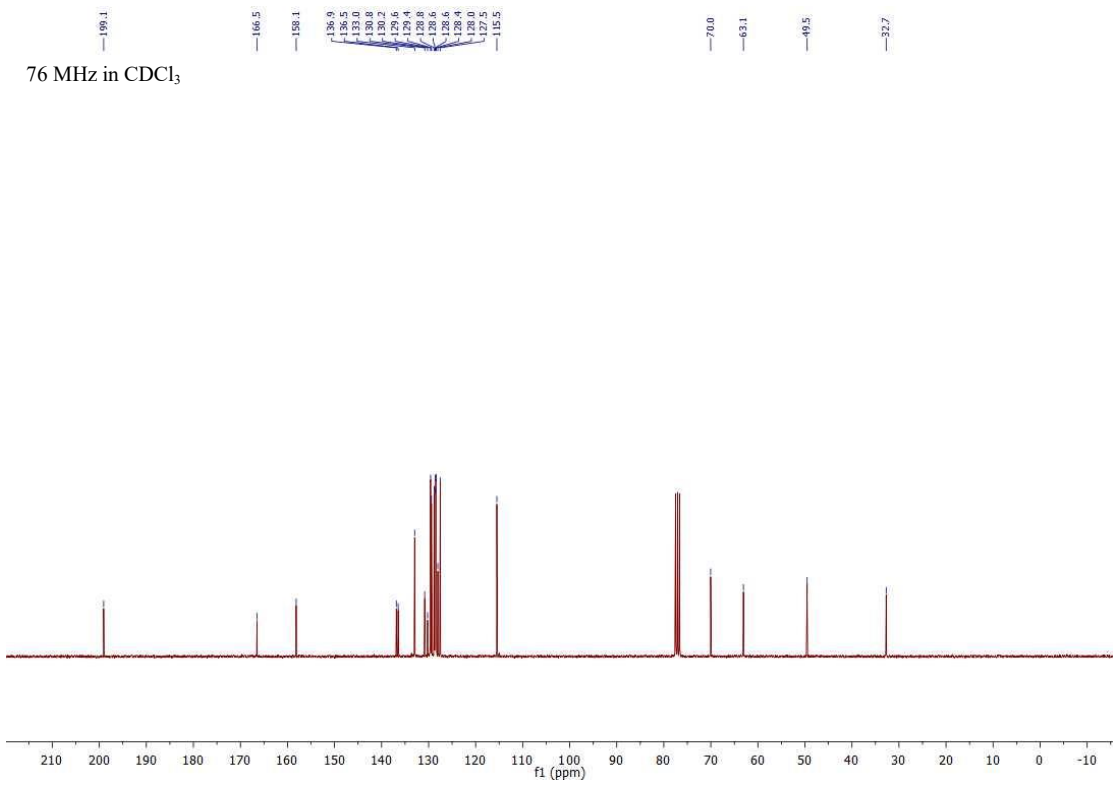

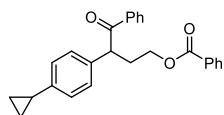

(3s)

300 MHz in CDCl<sub>3</sub>

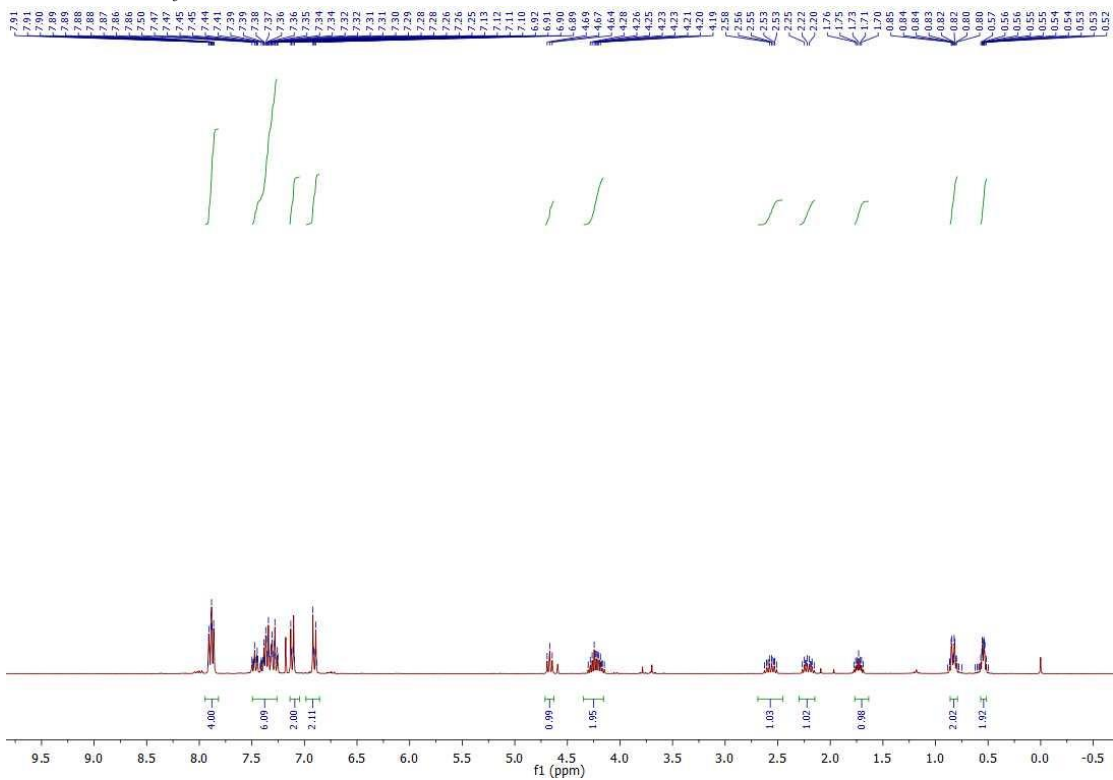

76 MHz in CDCl<sub>3</sub>

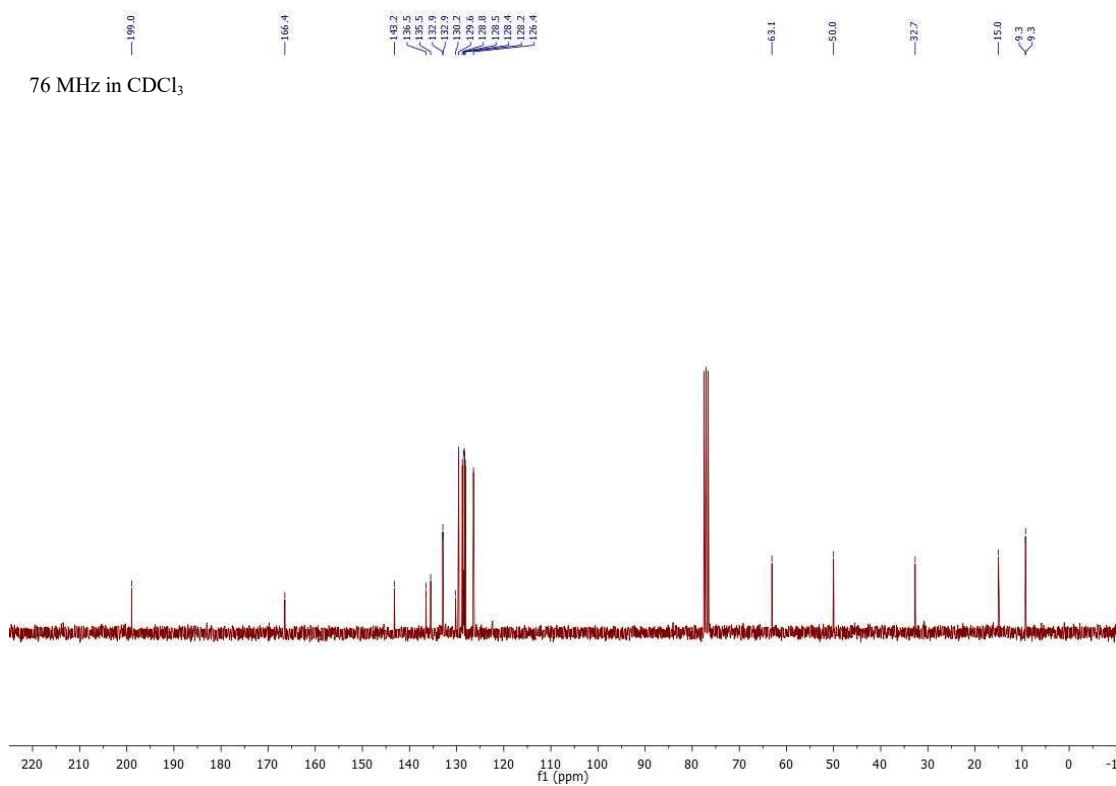

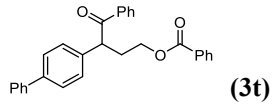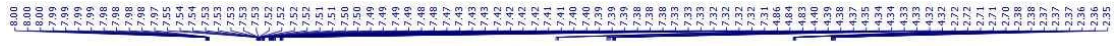

600 MHz in CDCl<sub>3</sub>

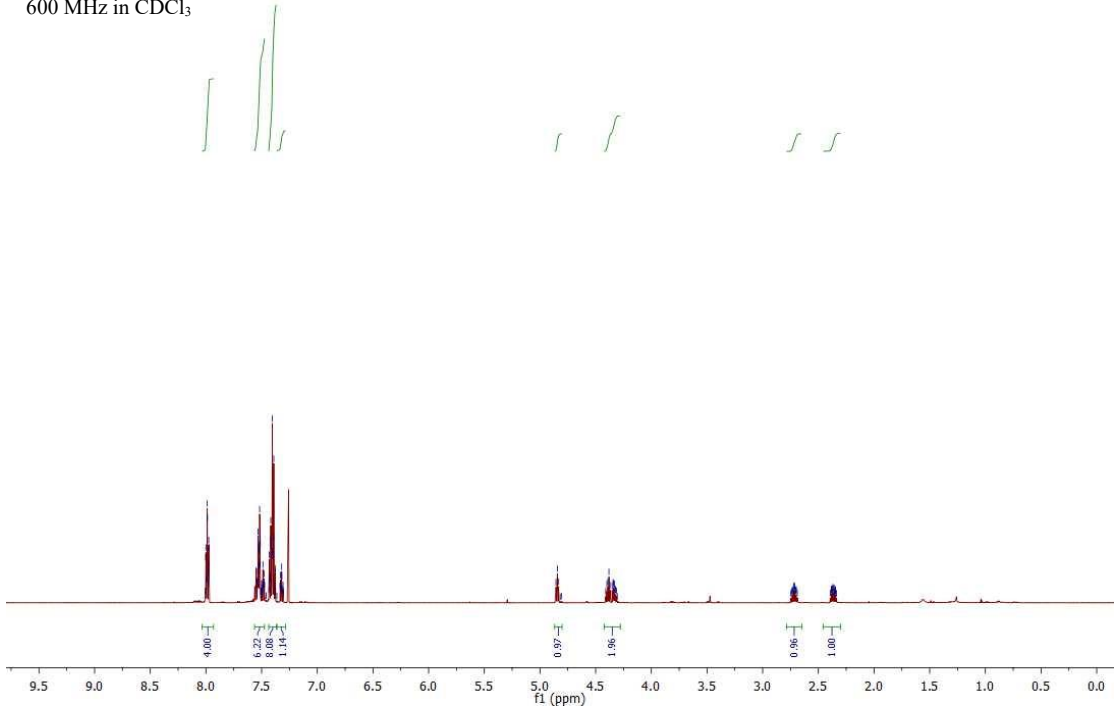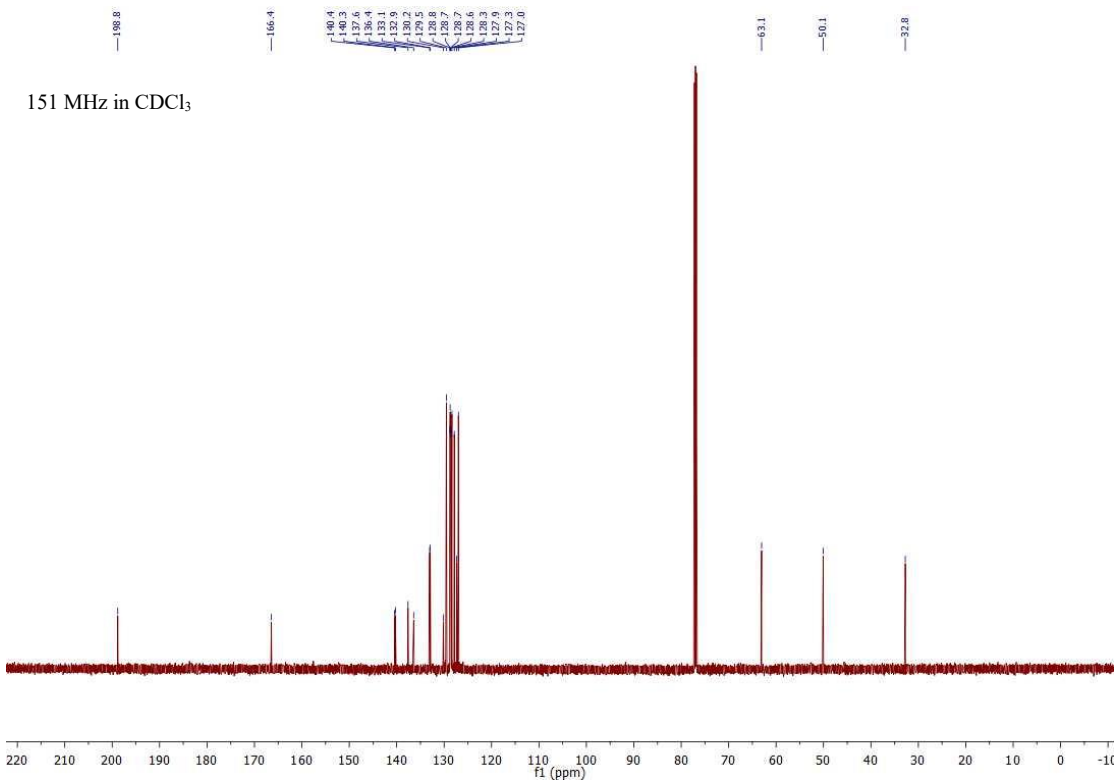

151 MHz in CDCl<sub>3</sub>

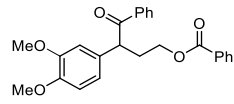

(3u)

300 MHz in CDCl<sub>3</sub>

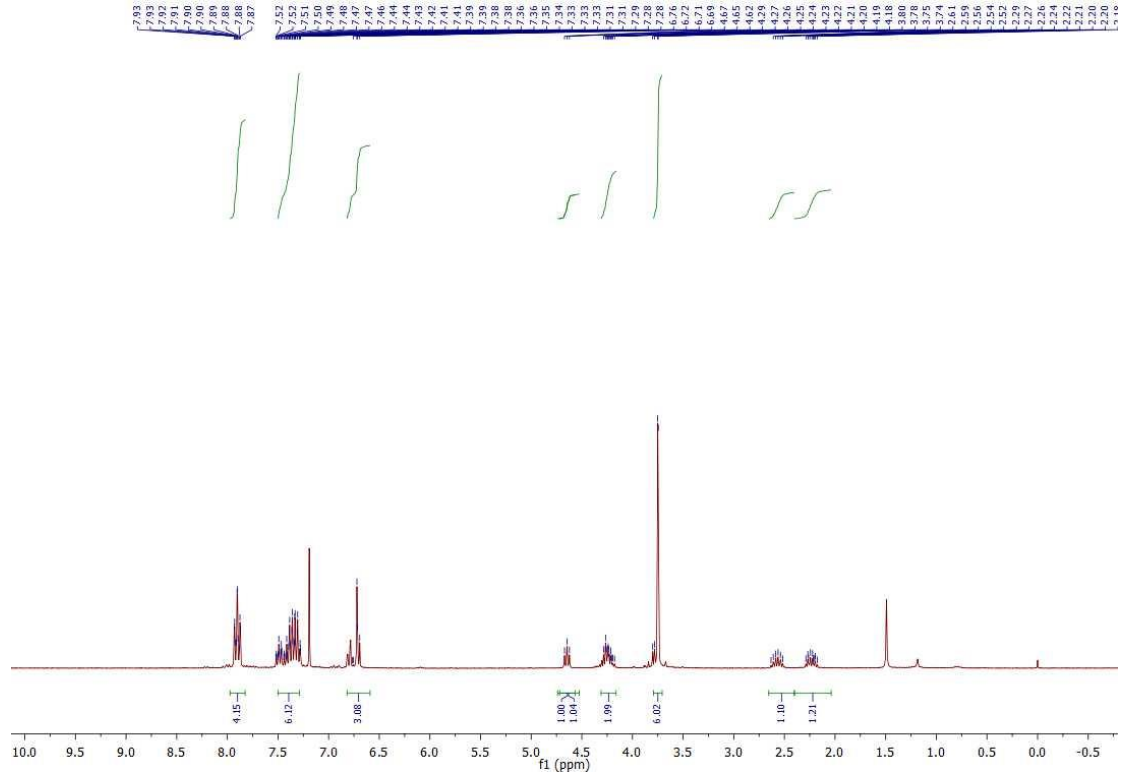

76 MHz in CDCl<sub>3</sub>

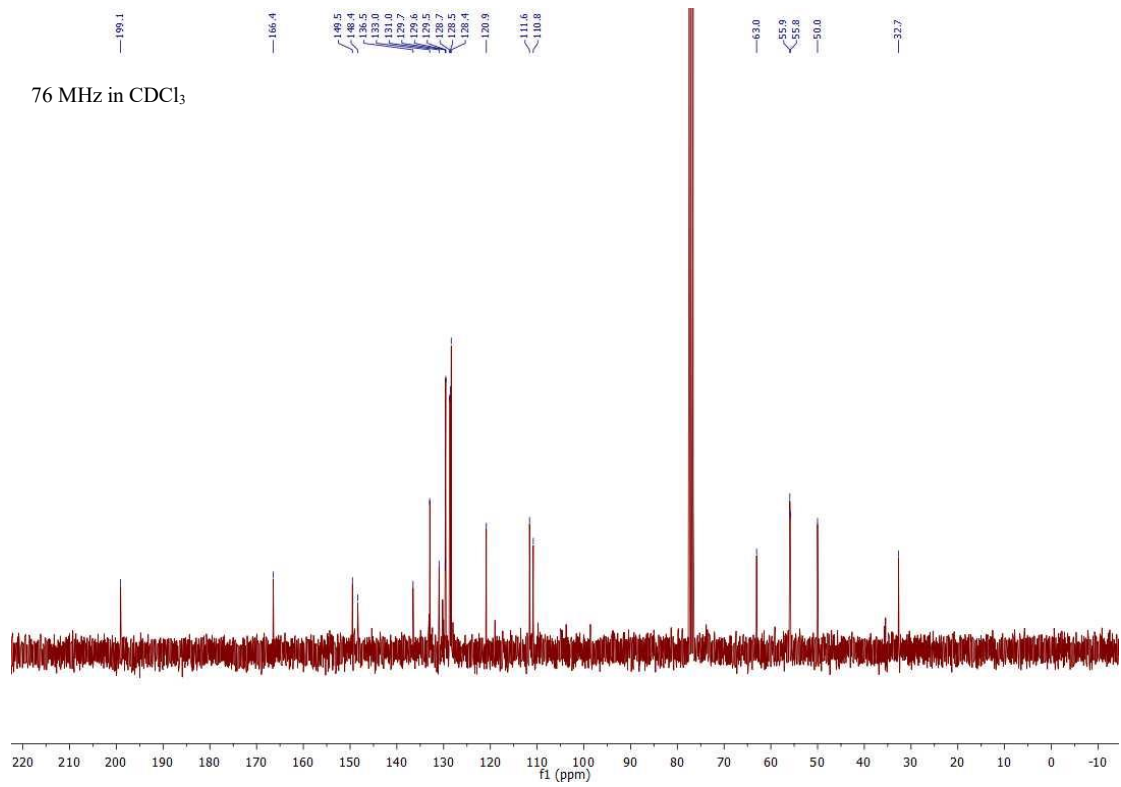

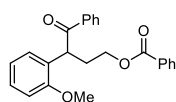

(3v)

500 MHz in CDCl<sub>3</sub>

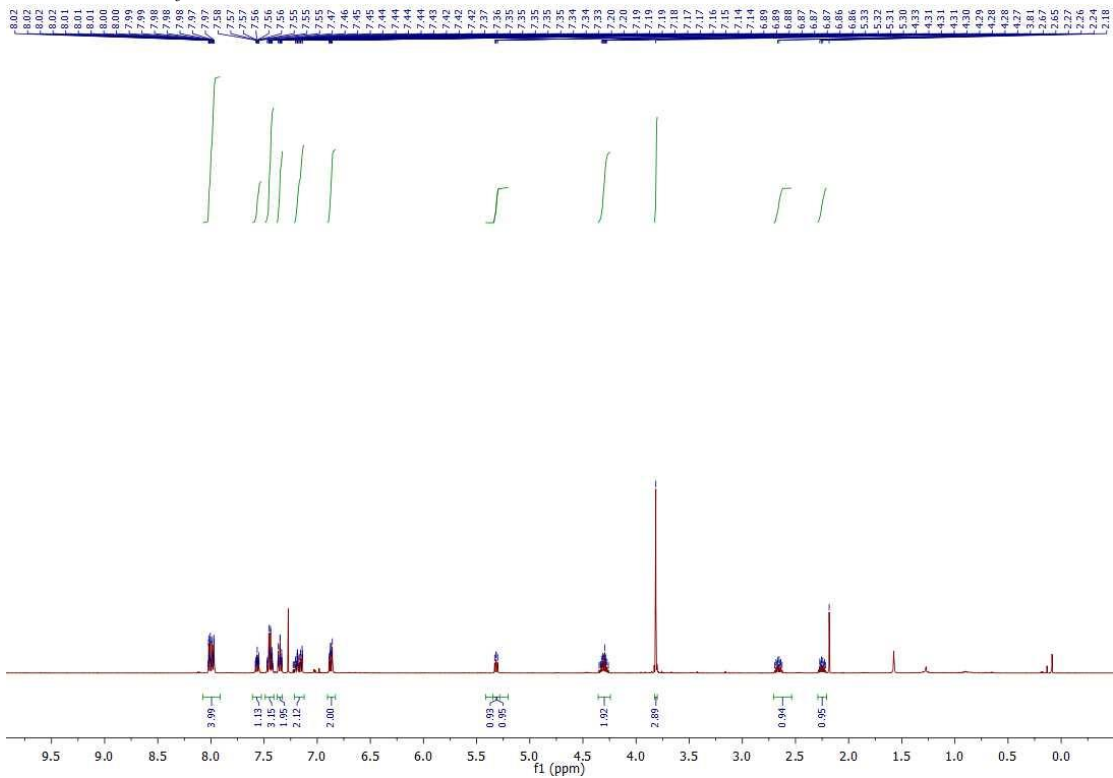

126 MHz in CDCl<sub>3</sub>

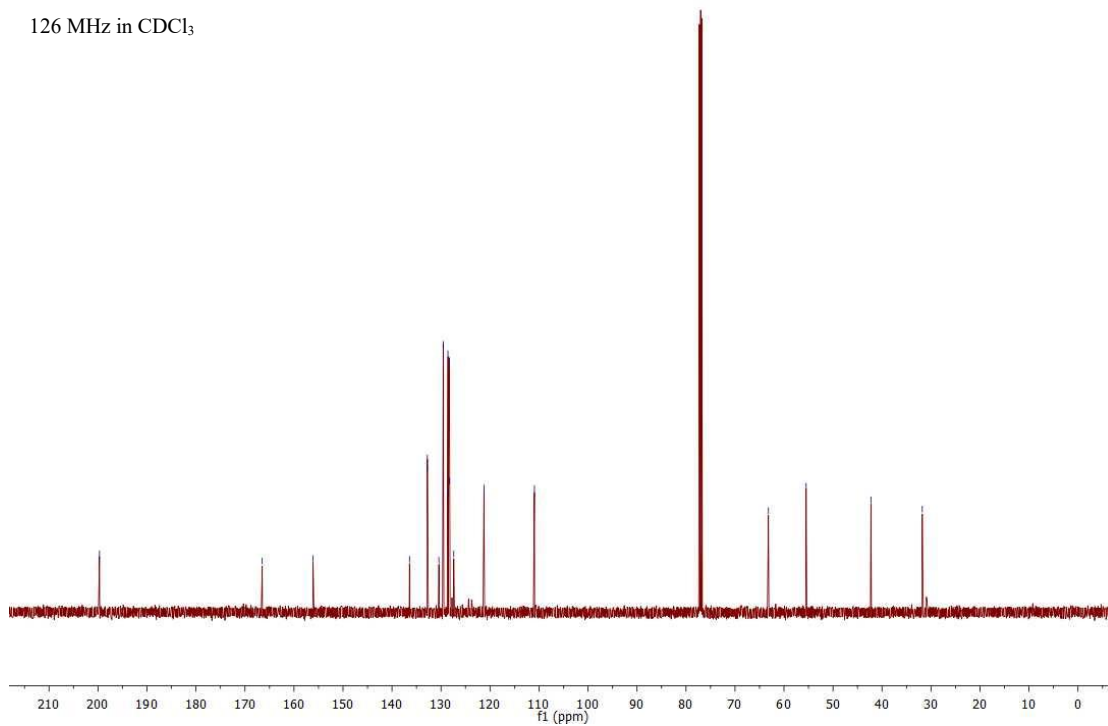

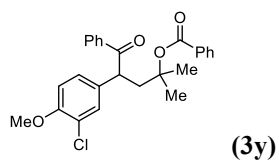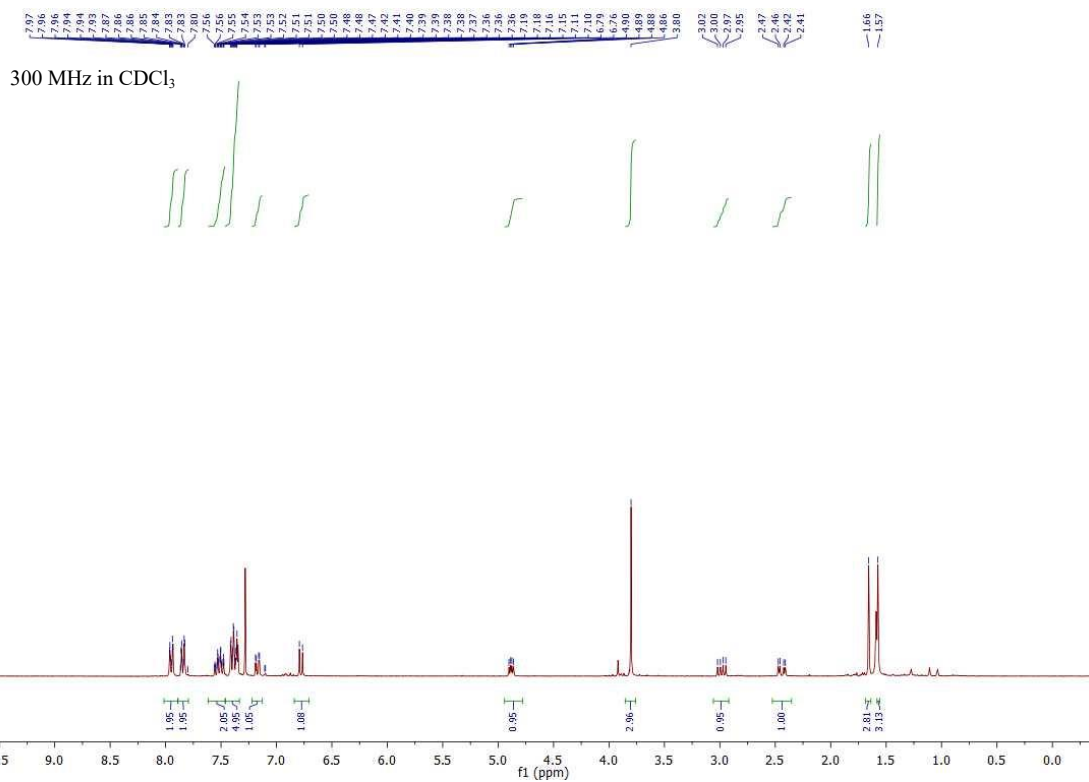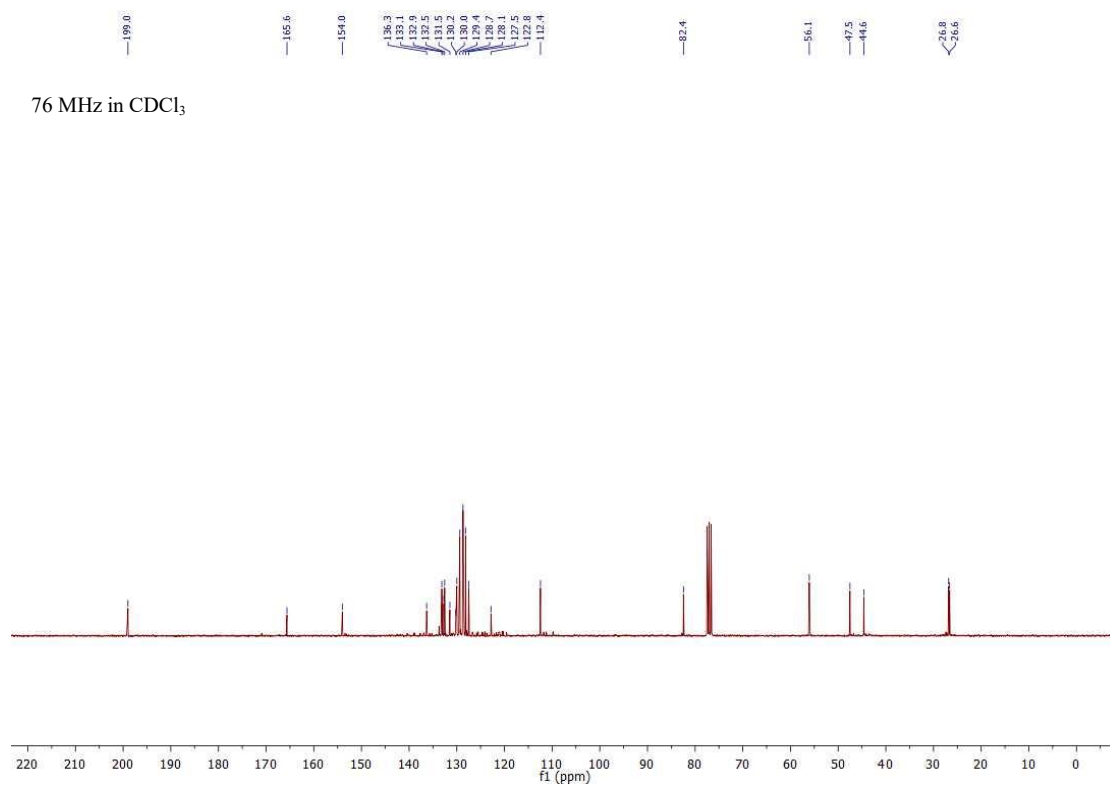





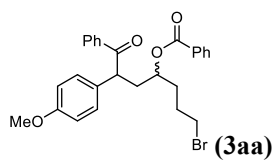

300 MHz in CDCl<sub>3</sub>

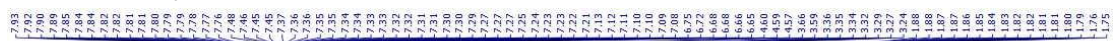

Mixture of diastereomer

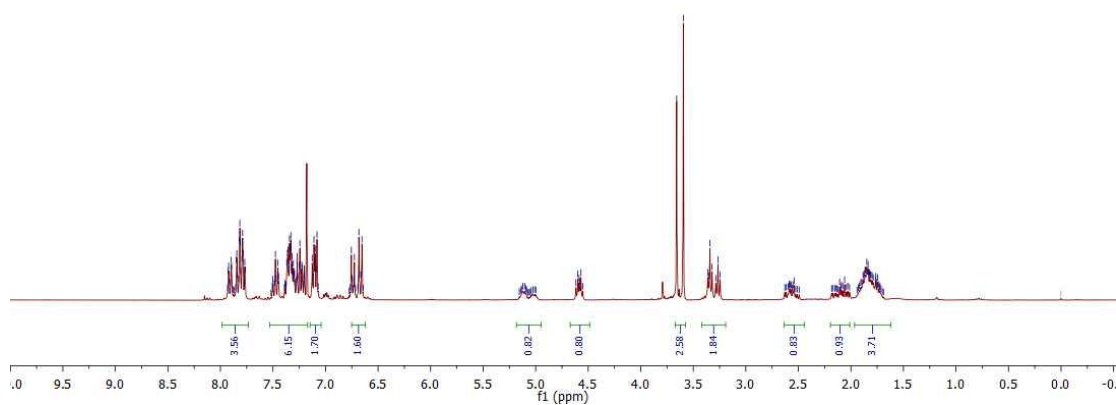

76 MHz in CDCl<sub>3</sub>

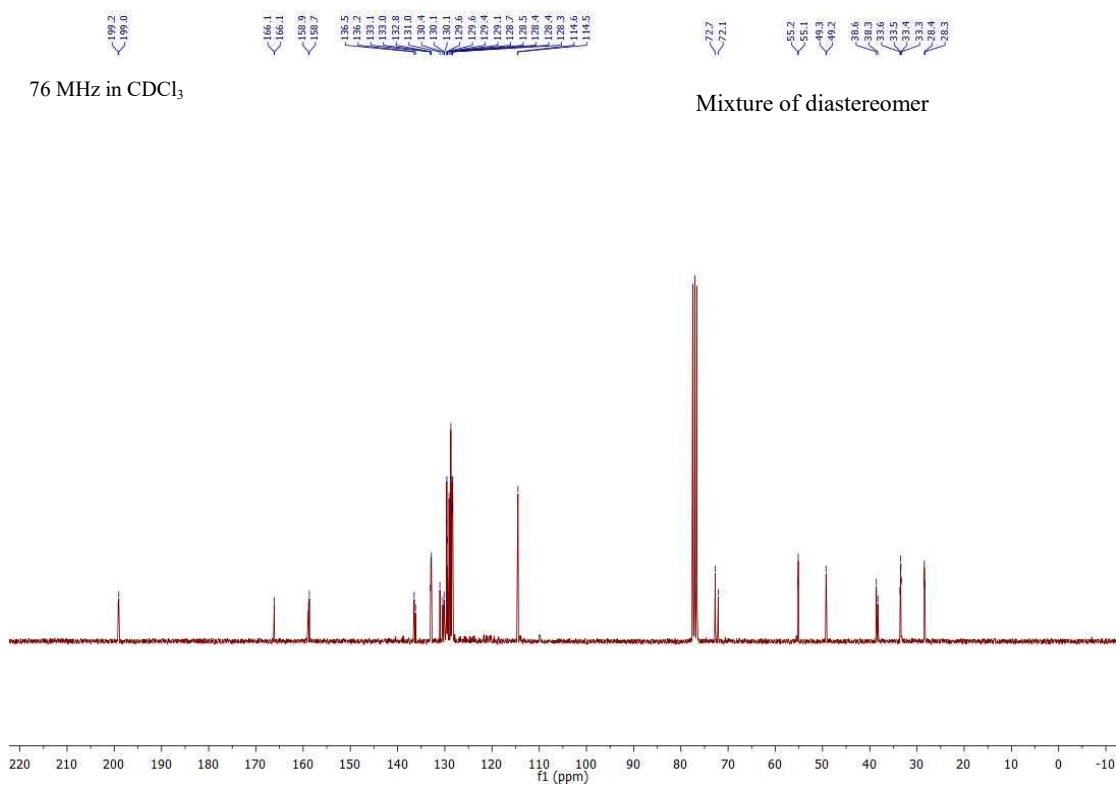

Mixture of diastereomer



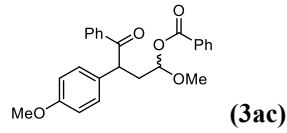

300 MHz in CDCl<sub>3</sub>

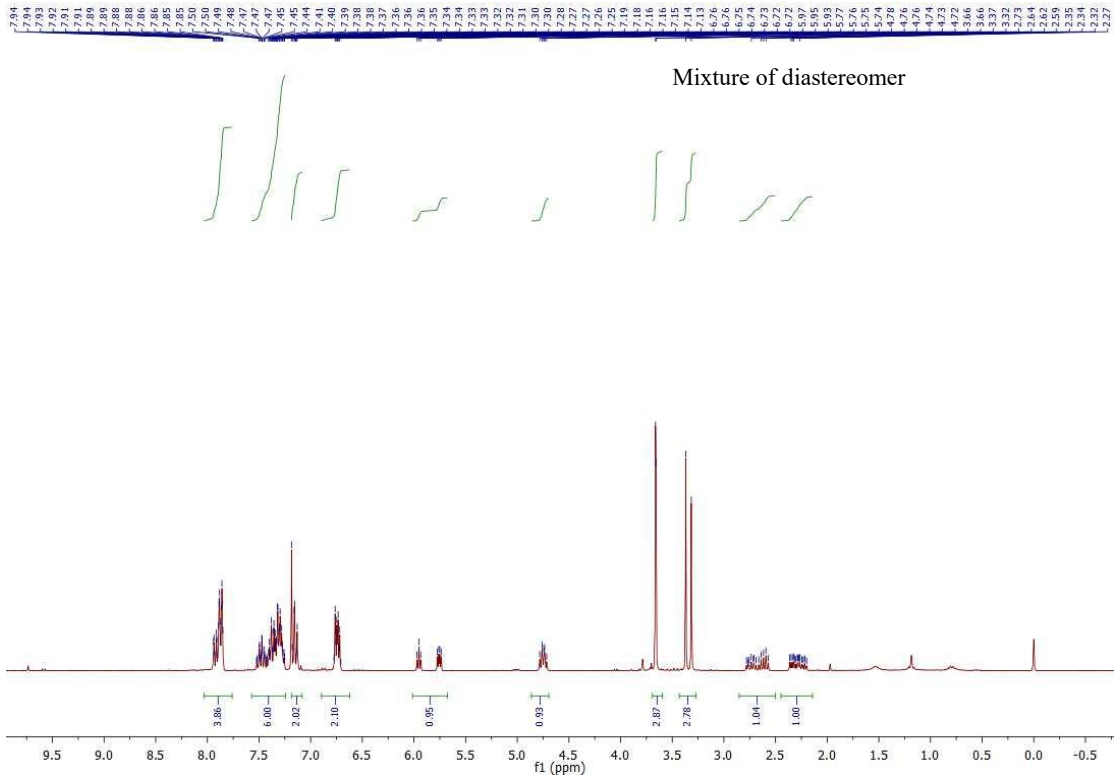

126 MHz in CD<sub>2</sub>Cl<sub>2</sub>+CDCl<sub>3</sub>

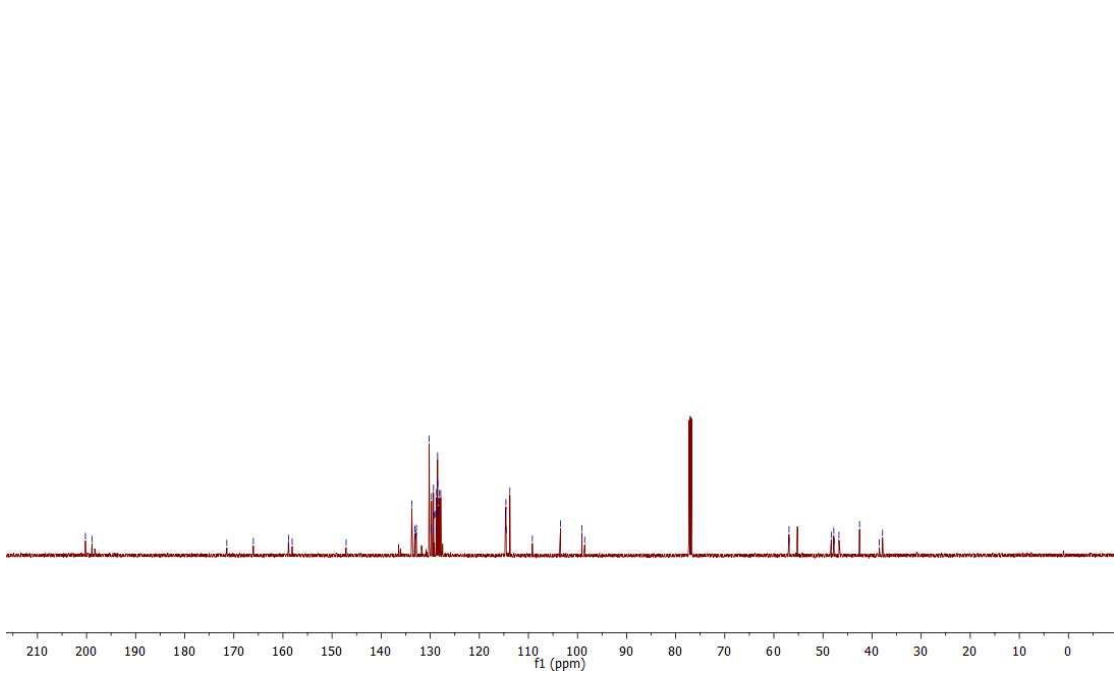



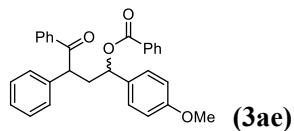

300 MHz in CDCl<sub>3</sub>

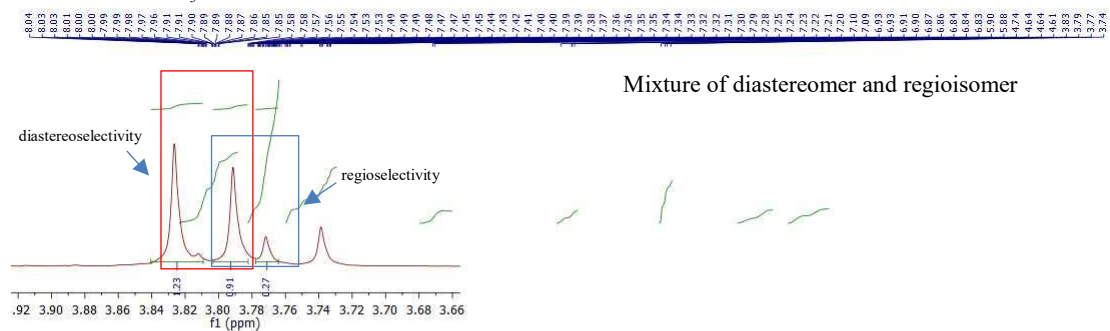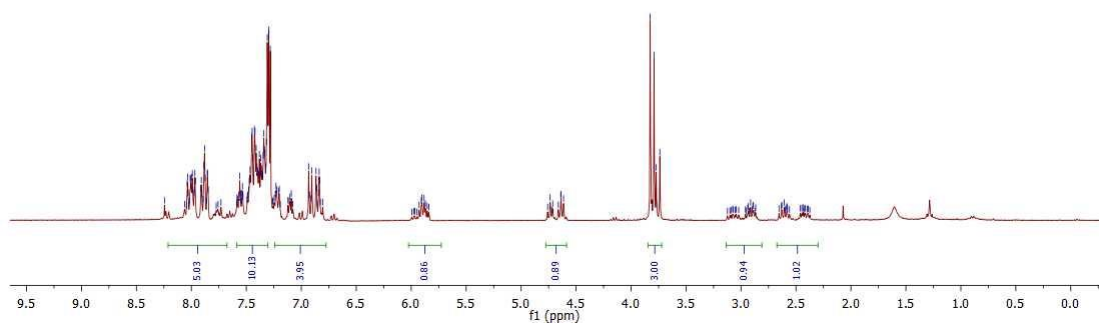

76 MHz in CDCl<sub>3</sub>

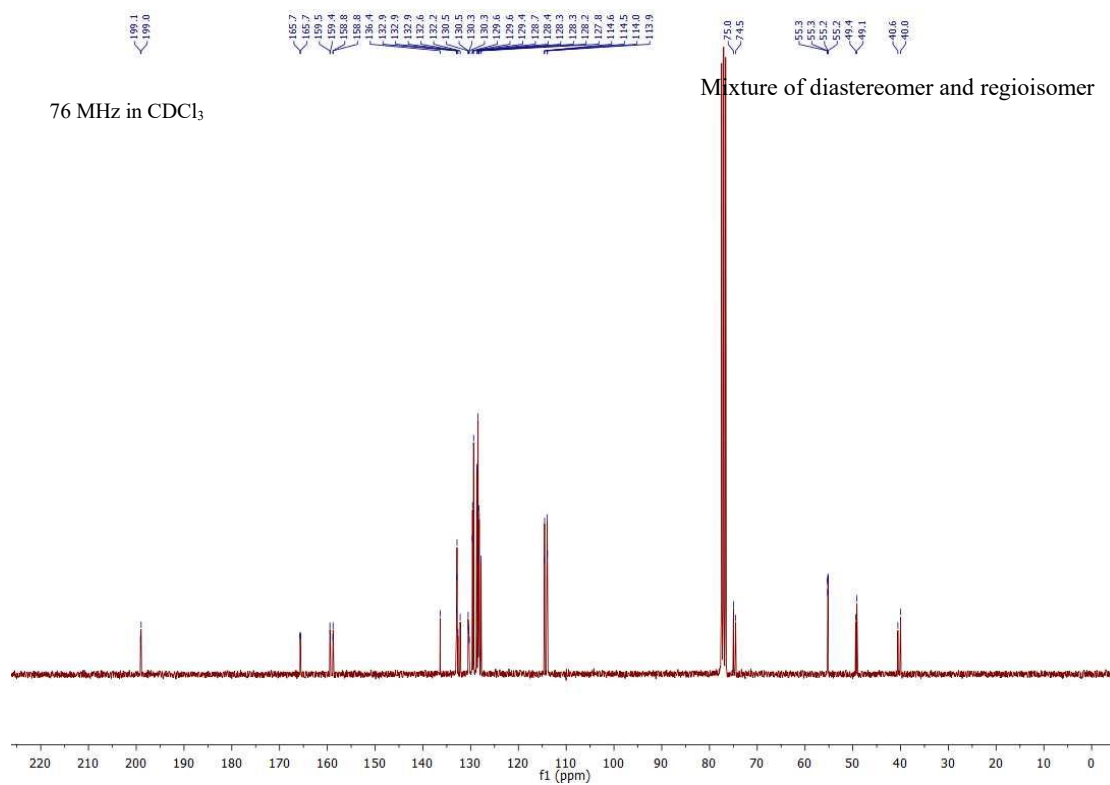

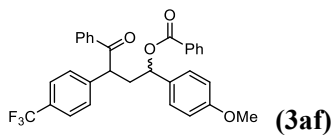

300 MHz in CDCl<sub>3</sub>

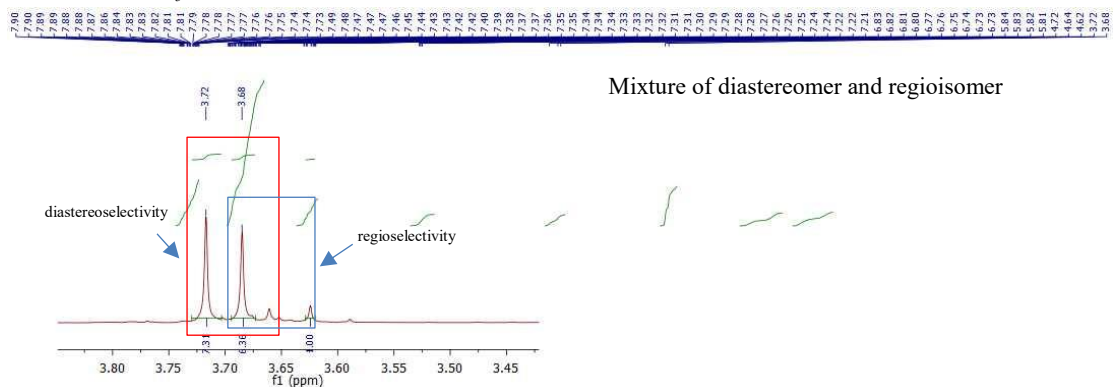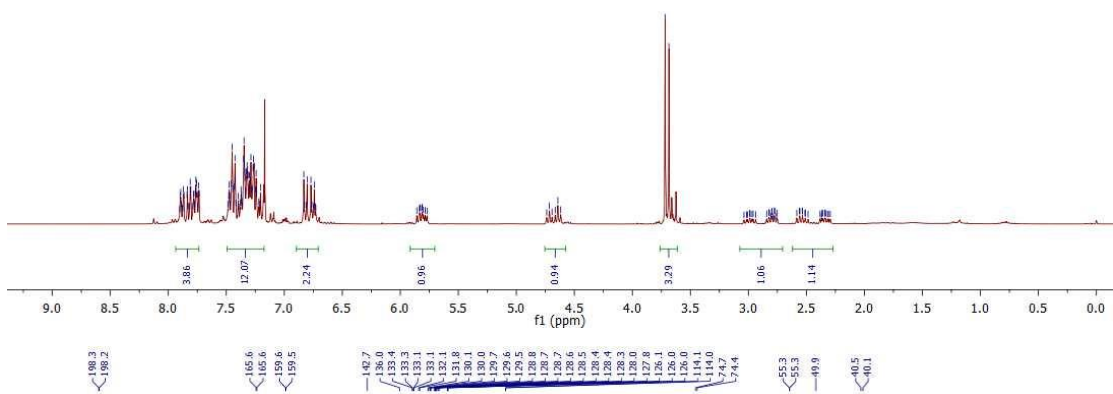

76 MHz in CDCl<sub>3</sub>

Mixture of diastereomer and regioisomer

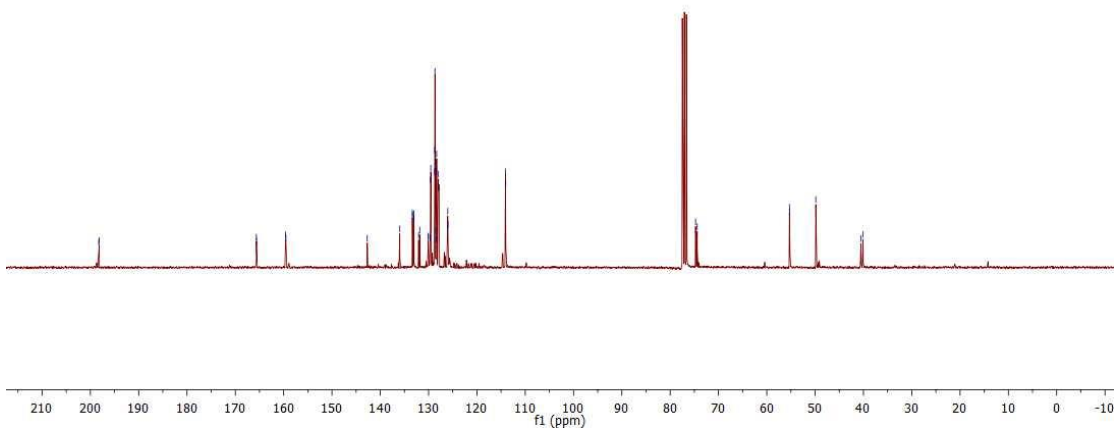

282 MHz in CDCl<sub>3</sub>

62.54  
62.56

Mixture of diastereomer and regioisomer

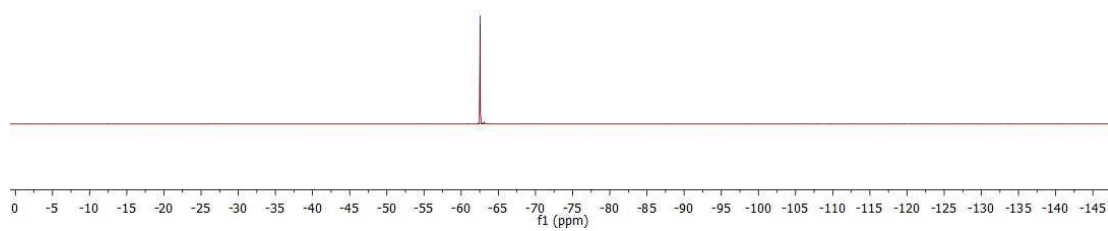





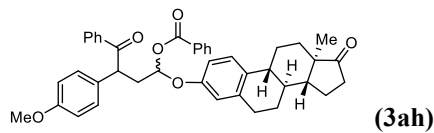

300 MHz in CDCl<sub>3</sub>

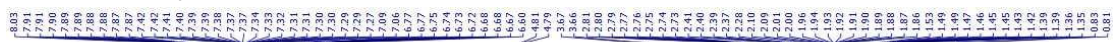

Mixture of diastereomer

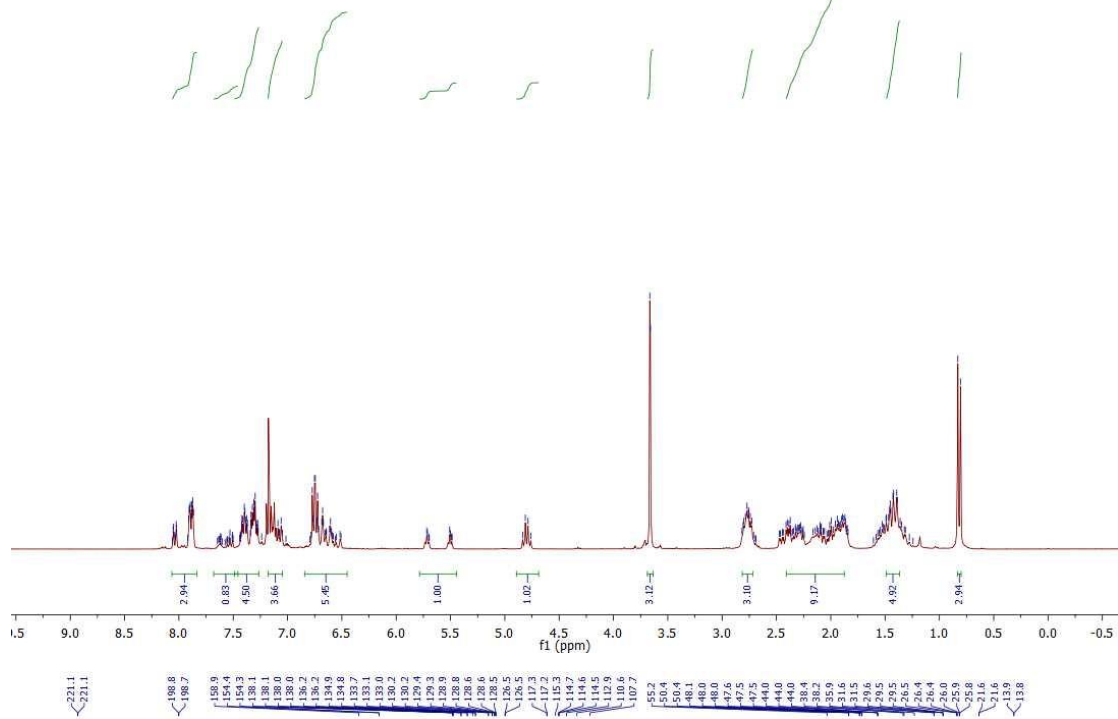

76 MHz in CDCl<sub>3</sub>

Mixture of diastereomer

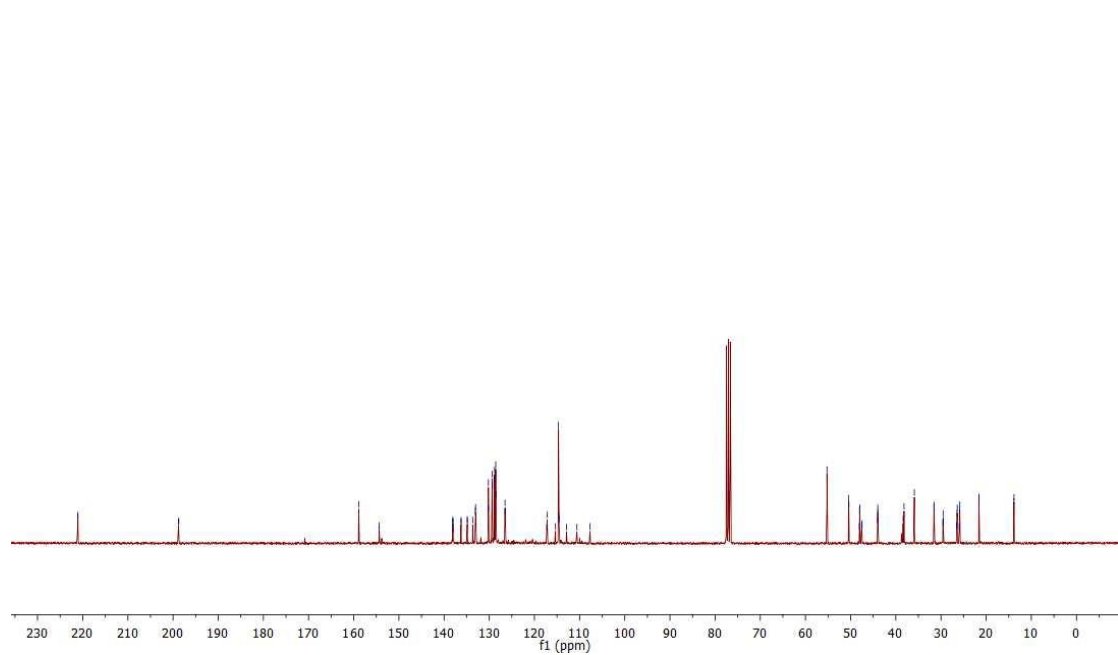

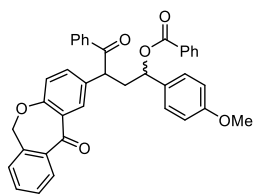

(3ai)

300 MHz in CDCl<sub>3</sub>

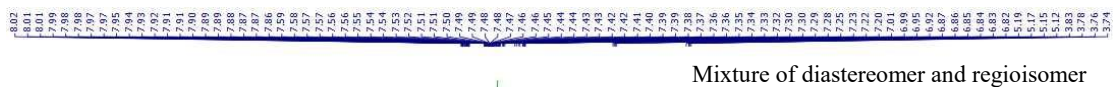

Mixture of diastereomer and regioisomer

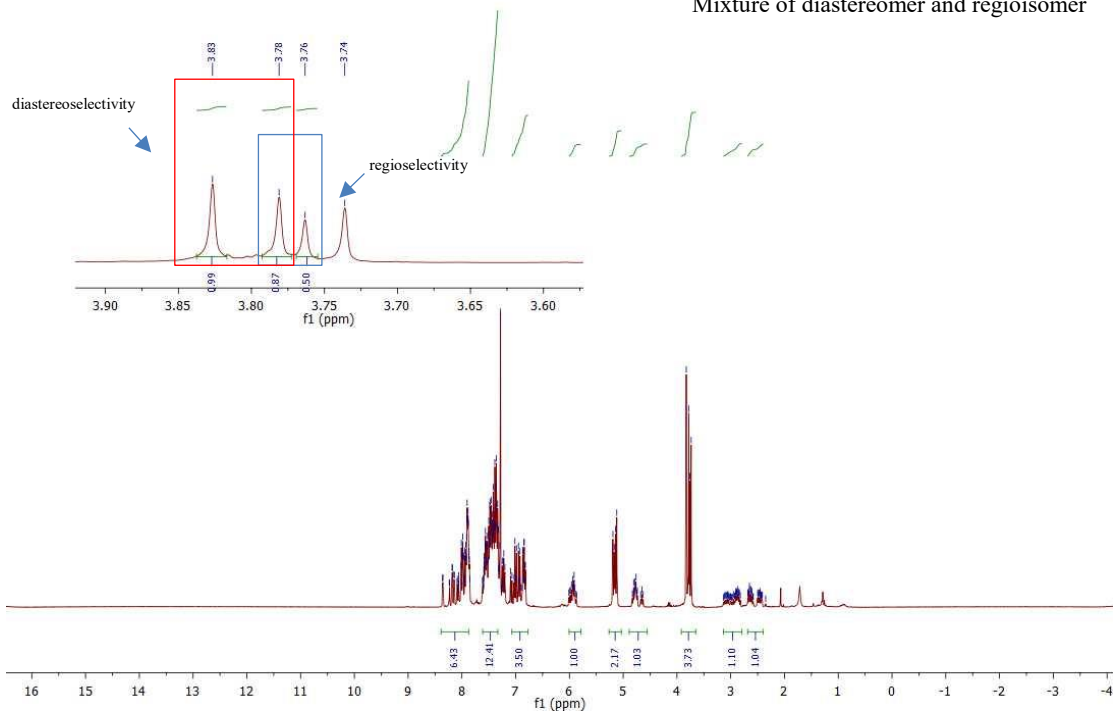

76 MHz in CDCl<sub>3</sub>

Mixture of diastereomer and regioisomer

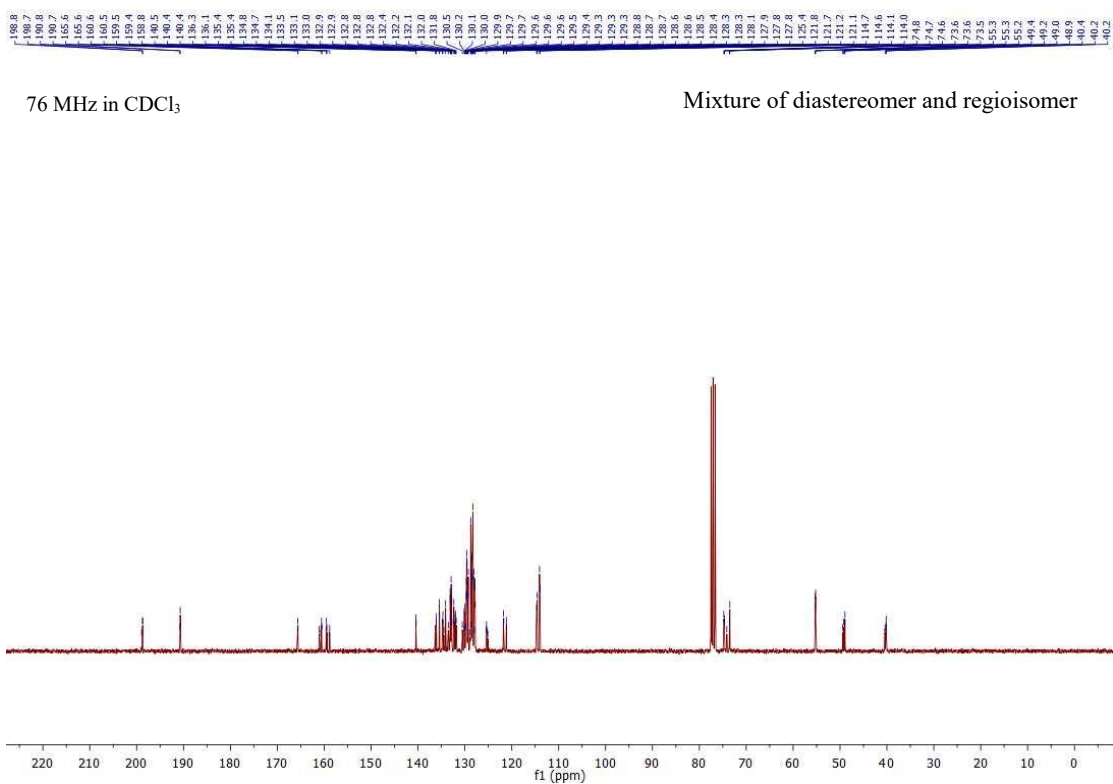

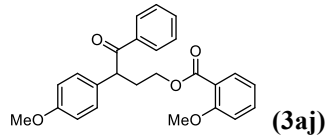

500 MHz in CDCl<sub>3</sub>

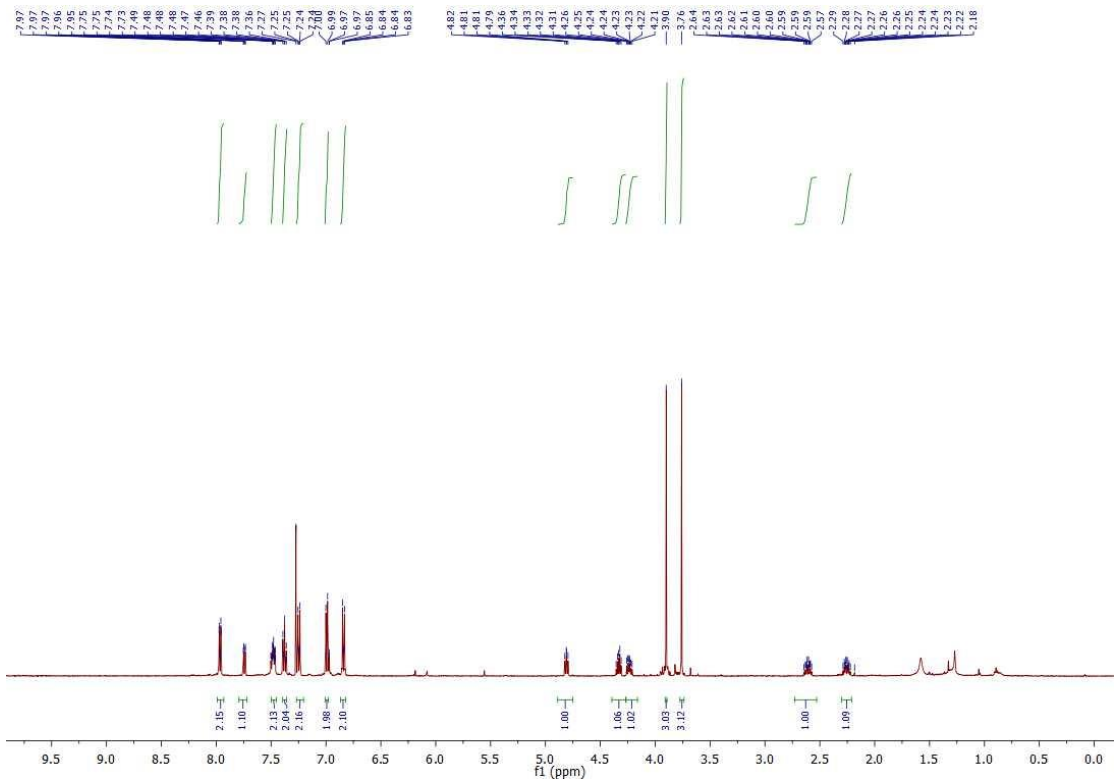

126 MHz in CDCl<sub>3</sub>

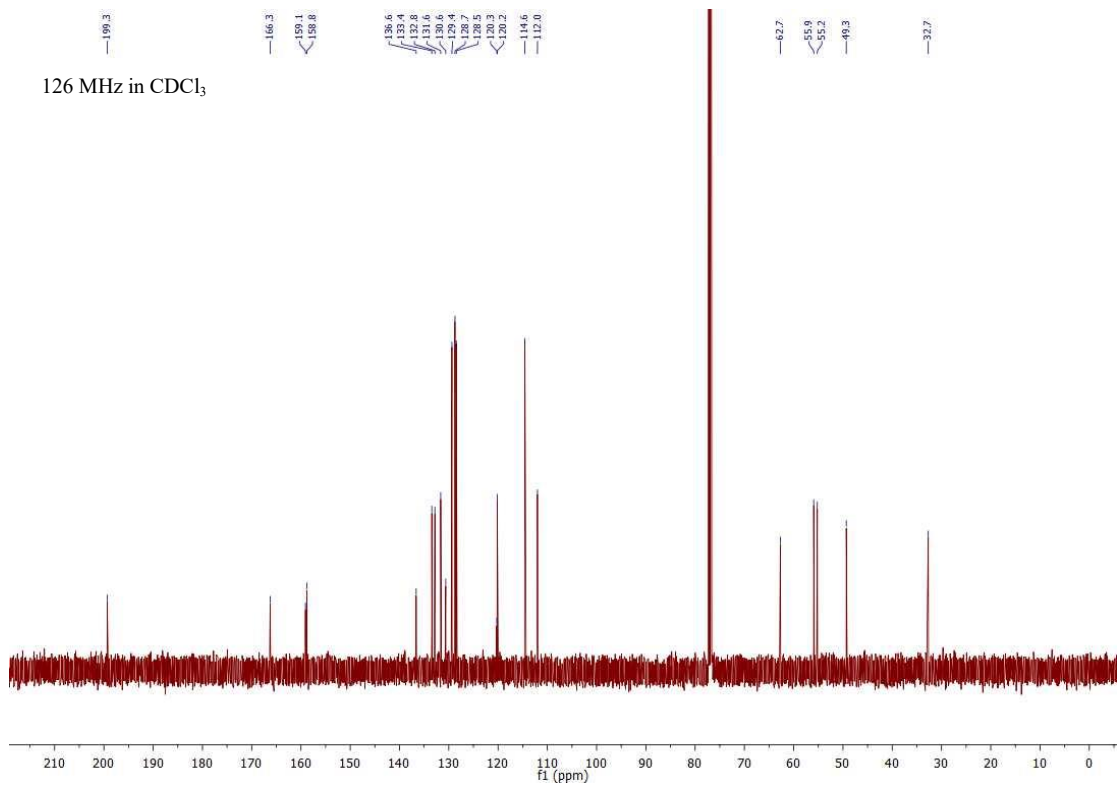

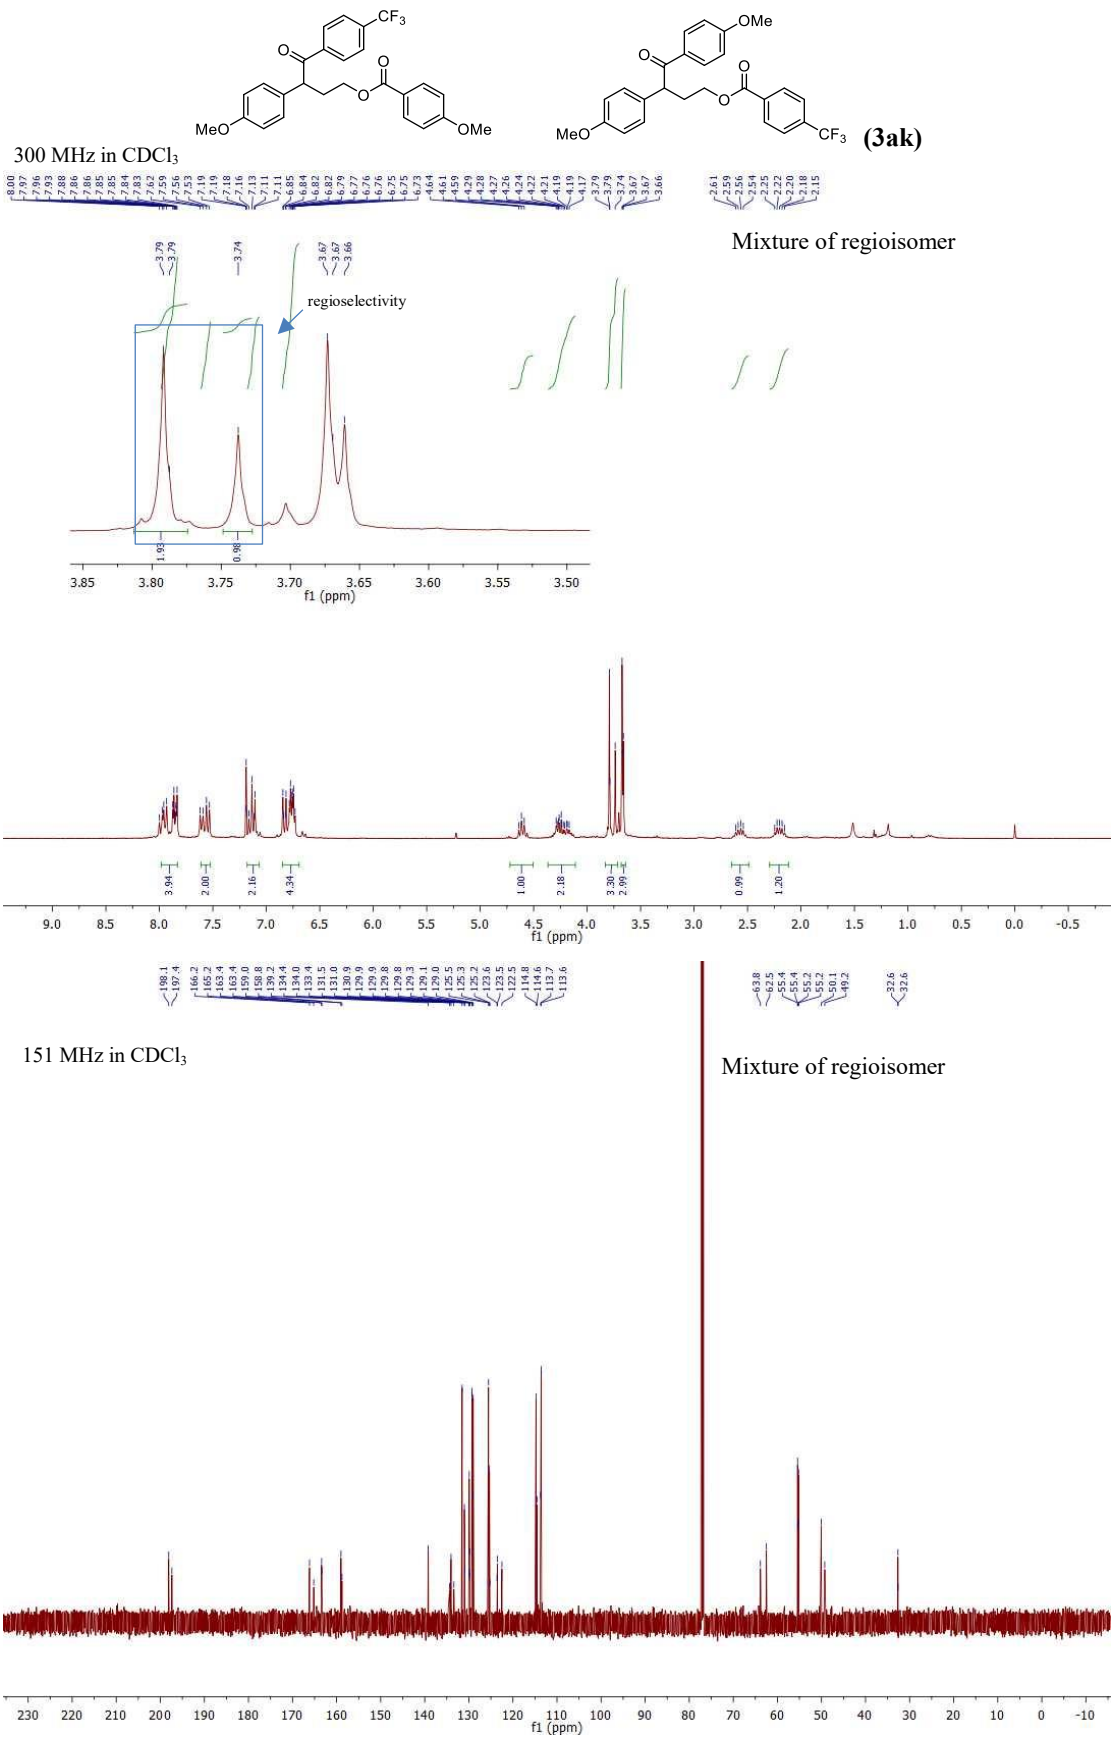

564 MHz in CDCl<sub>3</sub>

—63.13  
—63.23

Mixture of regioisomer

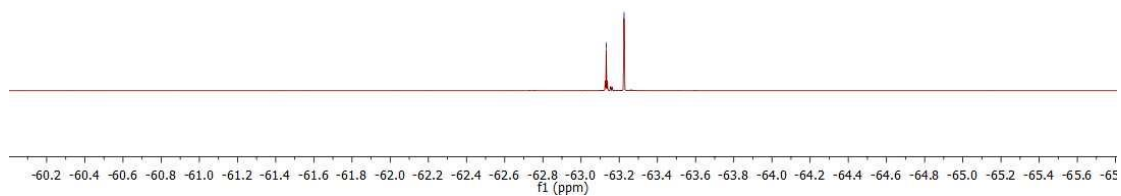

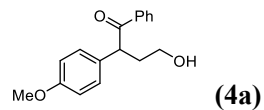

300 MHz in CDCl<sub>3</sub>

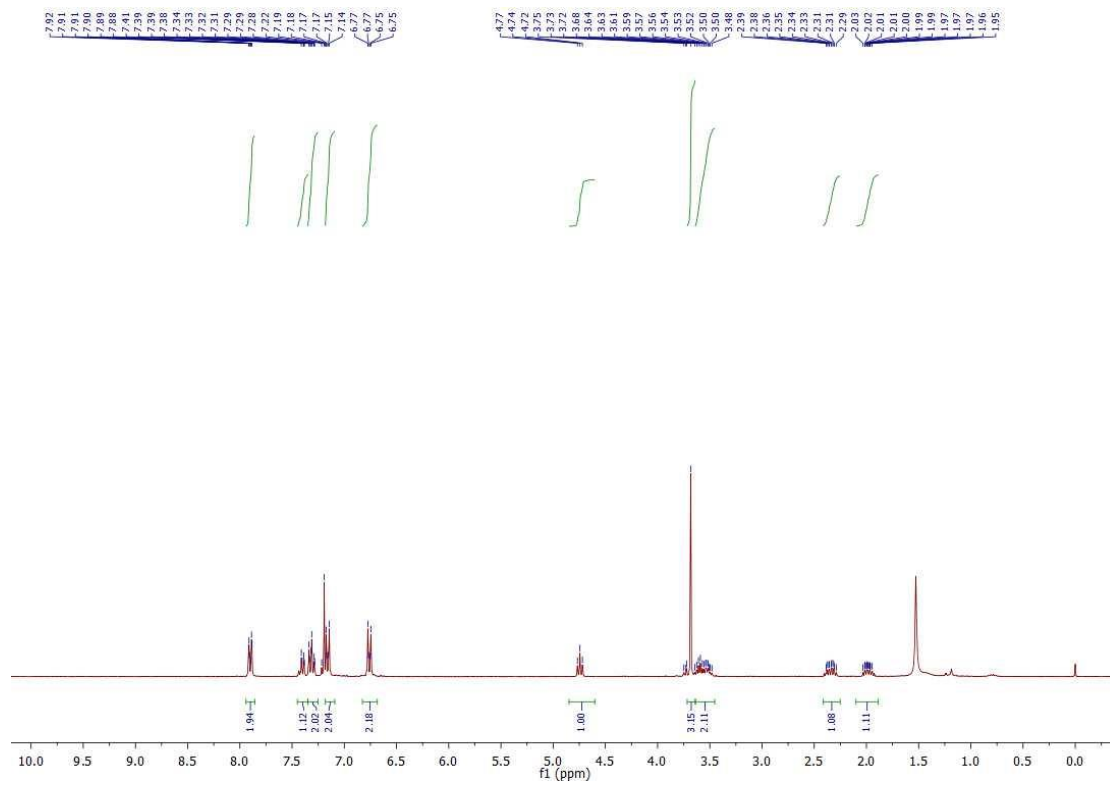

75 MHz in CDCl<sub>3</sub>

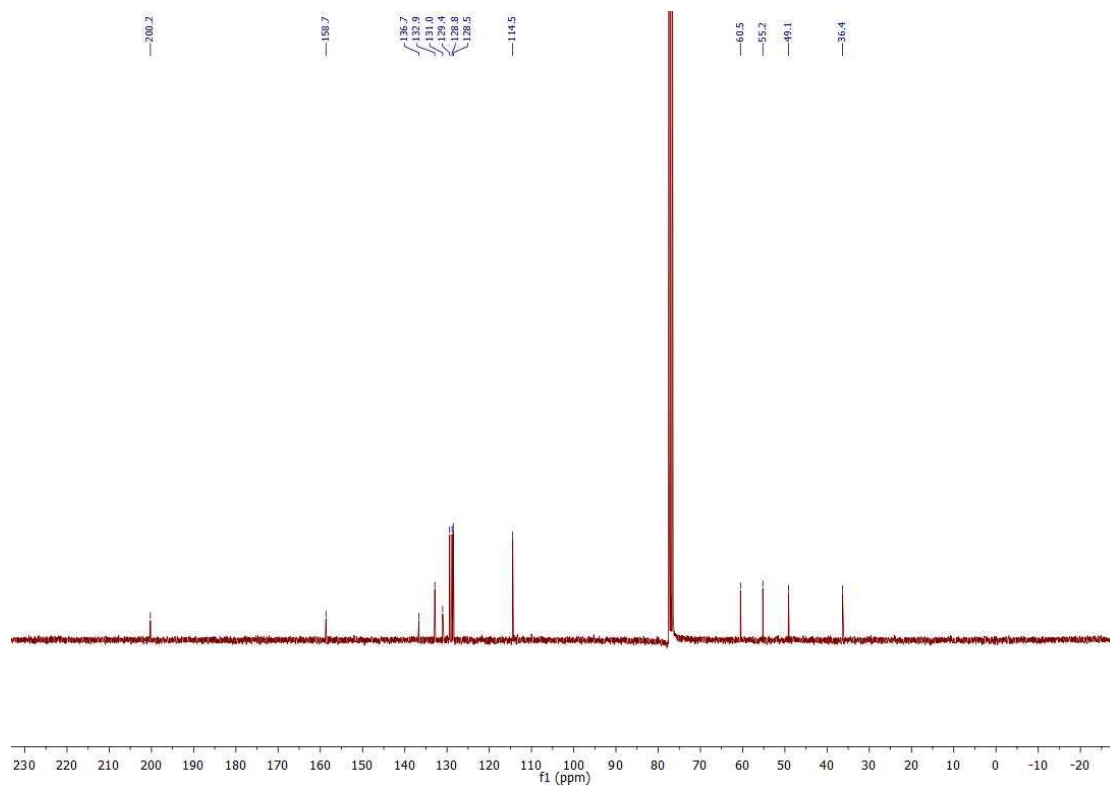



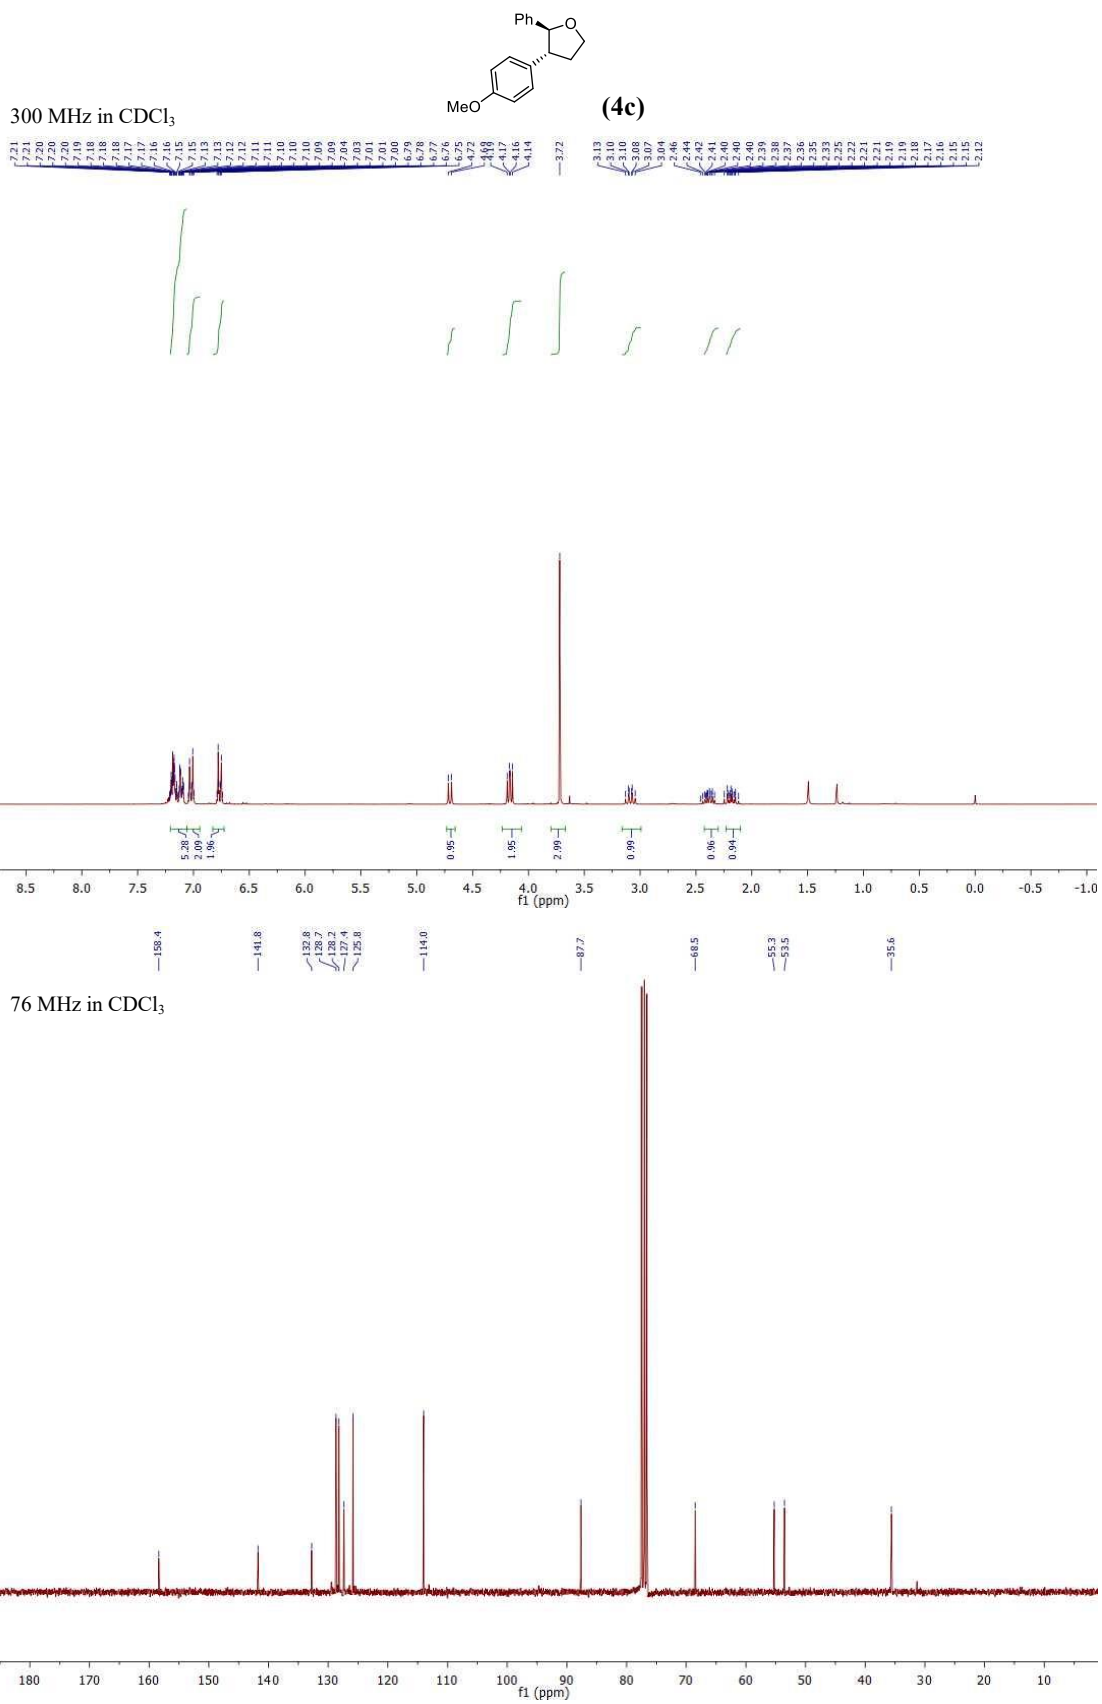

Supplement: ANIE-60-25252-s001.pdf [file ANIE-60-25252-s001.pdf]
